# Supplementary material
Source: PubMed Central journal article supplement (PMC3105772)
Supplement: ismej2010185x2.pdf [file ismej2010185x2.pdf]

**Table S1.** Proteins identified in the metaproteome of the Ace Lake 0.1 µm filters.

Gene ID: unique identifier assigned to each predicted open reading frame in the metagenome.

Protein group identification (\*): proteins that contain similar peptides that could not be differentiated by the mass spectral analysis were grouped. Only one gene number of that group is displayed.

Protein ambiguity groups (a-z , aa-pp) : proteins that have some shared peptides with one or more other proteins from the same sample depth are marked with the same subscript.

| <i>5 m - COG annotated proteins</i> |                               |                |               |                 |                                                                                                       |
|-------------------------------------|-------------------------------|----------------|---------------|-----------------|-------------------------------------------------------------------------------------------------------|
| Gene ID                             | Normalised spectral abundance | COG identifier | KO identifier | KEGG locus tag  | COG description : KEGG description                                                                    |
| 167852195 <sub>f</sub>              | 0.02530                       | COG1653        | K10232        | AAur_0459       | sugar-binding periplasmic proteins/domains : putative alpha-glucosides-binding ABC transporter (AglE) |
| 167782381*                          | 0.01724                       | COG1879        | K02058        | Ping_2790       | periplasmic sugar-binding proteins : bifunctional carbohydrate binding and transport protein          |
| 167813321                           | 0.01388                       | COG1629        |               | GFO_2756        | outer membrane receptor proteins, mostly Fe transport : TonB-dependent outer membrane receptor        |
| 167754347                           | 0.01044                       | COG1879        | K02058        | CMM_0792        | periplasmic sugar-binding proteins : putative sugar ABC transporter, solute-binding protein           |
| 167701754 <sub>a</sub>              | 0.00967                       | COG0834        | K09969        | SAR11_0953      | ABC-type amino acid transport system, periplasmic component : yhdW                                    |
| 167792775                           | 0.00630                       | COG1879        | K10552        | SMc02171        | periplasmic sugar-binding proteins : fructose transport system substrate-binding protein              |
| 167932252 <sub>d</sub>              | 0.00537                       | COG0715        | K02051        | SAR11_0807      | ABC-type nitrate/sulfonate/taurine/bicarbonate transport systems, periplasmic components              |
| 167759671                           | 0.00493                       | COG0605        |               | NEMVE_v1g231554 | superoxide dismutase                                                                                  |
| 167751919 <sub>h</sub>              | 0.00468                       | COG3740        |               | ROP_69760       | phage head maturation protease                                                                        |

|                        |         |         |        |             |                                                                                                                               |
|------------------------|---------|---------|--------|-------------|-------------------------------------------------------------------------------------------------------------------------------|
| 167907426              | 0.00438 | COG1638 |        | SAR11_0266  | dicarboxylate-binding periplasmic protein : TRAP dicarboxylate transporter - DctP subunit (mannitol/chloroaromatic compounds) |
| 167711086              | 0.00425 | COG0834 | K02030 | TM1040_0294 | ABC-type amino acid transport system, periplasmic component : lysine-arginine-ornithine-binding periplasmic protein           |
| 167819184              | 0.00389 | COG2113 | K02002 | SAR11_1302  | ABC-type proline/glycine betaine transport systems, periplasmic components : opuAC                                            |
| 167680030              | 0.00346 | COG0683 | K01999 | AAur_1271   | ABC-type branched-chain amino acid transport systems, periplasmic component : braC                                            |
| 167865828 <sub>b</sub> | 0.00338 | COG0834 | K09969 | HCH_05807   | ABC-type amino acid transport system, periplasmic component                                                                   |
| 167684228 <sub>c</sub> | 0.00331 | COG0459 | K04077 | SAR11_0162  | chaperonin GroEL (HSP60 family)                                                                                               |
| 167868594 <sub>d</sub> | 0.00311 | COG0715 | K02051 | SAR11_0807  | ABC-type nitrate/sulfonate/taurine/bicarbonate transport systems, periplasmic components                                      |
| 167785199 <sub>c</sub> | 0.00309 | COG0459 | K04077 | CHU_1828    | chaperonin GroEL (HSP60 family)                                                                                               |
| 167819050              | 0.00304 | COG2113 | K02001 | Plav_1066   | ABC-type proline/glycine betaine transport systems, periplasmic components                                                    |
| 167867034              | 0.00284 | COG0687 | K02055 | SAR11_1336  | spermidine/putrescine-binding periplasmic protein : potD;                                                                     |
| 167700934              | 0.00277 | COG0450 |        | SPO3383     | peroxiredoxin : thiol-specific antioxidant protein                                                                            |
| 167816084 <sub>a</sub> | 0.00253 | COG0834 | K09969 | SAR11_0953  | ABC-type amino acid transport system, periplasmic component : yhdW                                                            |
| 167714114              | 0.00179 | COG0687 | K02055 | SAR11_1336  | spermidine/putrescine-binding periplasmic protein : potD                                                                      |
| 167712994 <sub>b</sub> | 0.00175 | COG0834 | K09969 | HCH_05807   | ABC-type amino acid transport system, periplasmic component                                                                   |
| 167824568              | 0.00164 | COG3181 |        | Dshi_2450   | uncharacterized BCR : hypothetical protein                                                                                    |
| 167925495              | 0.00159 | COG1653 | K02027 | Krad_1380   | sugar-binding periplasmic proteins/domains                                                                                    |

|                        |         |         |        |               |                                                                                                                                          |
|------------------------|---------|---------|--------|---------------|------------------------------------------------------------------------------------------------------------------------------------------|
| 167695410 <sub>a</sub> | 0.00155 | COG0834 | K09969 | SAR11_0953    | ABC-type amino acid transport system, periplasmic component : yhdW                                                                       |
| 167695984*             | 0.00138 | COG1879 |        |               | periplasmic sugar-binding proteins                                                                                                       |
| 167703404              | 0.00134 | COG1012 | K00128 | AAur_pTC20196 | NAD-dependent aldehyde dehydrogenases                                                                                                    |
| 167718230              | 0.00125 | COG0683 | K01999 | AAur_1271     | ABC-type branched-chain amino acid transport systems, periplasmic component : braC                                                       |
| 167735996              | 0.00103 | COG0591 |        | SAR11_0316    | Na <sup>+</sup> /proline, Na <sup>+</sup> /panthothenate symporters and related permeases : yjcG                                         |
| 167739054              | 0.00101 | COG1028 | K00059 | SH0230        | dehydrogenases with different specificities (related to short-chain alcohol dehydrogenases) : 3-oxoacyl-[acyl-carrier protein] reductase |
| 167701096              | 0.00100 | COG0776 |        | KRH_03630     | bacterial nucleoid DNA-binding protein : HU_IHF family transcriptional regulator                                                         |
| 167817334              | 0.00098 | COG0715 |        | FRAAL1422     | ABC-type nitrate/sulfonate/taurine/bicarbonate transport systems, periplasmic components                                                 |
| 167703266 <sub>c</sub> | 0.00095 | COG0459 | K04077 | Noca_3982     | chaperonin GroEL (HSP60 family)                                                                                                          |
| 167768609              | 0.00095 | COG3181 |        | RD1_2202      | uncharacterized BCR                                                                                                                      |
| 167868532              | 0.00093 | COG3181 | K07795 | HCH_01639     | uncharacterized BCR : putative tricarboxylic transport membrane protein                                                                  |
| 167865516              | 0.00088 | COG0747 |        | CMM_2185      | ABC-type dipeptide/oligopeptide/nickel transport systems, periplasmic components                                                         |
| 167911715              | 0.00083 | COG0776 | K03530 | Sala_0799     | bacterial nucleoid DNA-binding protein : DNA-binding protein HU-beta                                                                     |
| 167736316              | 0.00082 | COG0174 | K01915 | SAR11_0747    | glutamine synthase : glnA                                                                                                                |
| 167916441              | 0.00079 | COG1629 |        | BF2044        | outer membrane receptor proteins, mostly Fe transport : putative TonB-dependent outer membrane receptor protein                          |
| 167920571              | 0.00078 | COG0776 | K03530 | SAR11_0817    | bacterial nucleoid DNA-binding protein : hupA                                                                                            |

|                          |         |         |        |            |                                                                                                                            |
|--------------------------|---------|---------|--------|------------|----------------------------------------------------------------------------------------------------------------------------|
| 167703332                | 0.00066 | COG1732 | K05845 | Strop_1633 | periplasmic glycine betaine/choline-binding (lipo)protein of an ABC-type transport system (osmoprotectant binding protein) |
| 167662373                | 0.00063 | COG0834 |        | Pden_1025  | ABC-type amino acid transport system, periplasmic component : extracellular solute-binding protein, family 3               |
| 167890974                | 0.00062 | COG1878 |        | nfa12380   | uncharacterized ACR, predicted metal-dependent hydrolases                                                                  |
| 167824660                | 0.00061 | COG0683 | K01999 | SAR11_1361 | ABC-type branched-chain amino acid transport systems, periplasmic component : livJ2; Leu/Ile/Val-binding protein precursor |
| 167886240                | 0.00061 | COG0335 | K02884 | CHU_0120   | rplS; 50S ribosomal protein L19                                                                                            |
| 167921445                | 0.00058 | COG0811 |        | GFO_0088   | biopolymer transport proteins : exbB; ExbB-like MotA/TolQ/ExbB family                                                      |
| 167776275 <sub>ee</sub>  | 0.00055 | COG3740 | K06904 | BL0376     | phage head maturation protease                                                                                             |
| 167659892* <sub>ee</sub> | 0.00055 | COG3740 |        | ROP_69760  | phage head maturation protease                                                                                             |
| 167786475                | 0.00054 | COG0098 | K02988 | Fjoh_0380  | rpsE; 30S ribosomal protein S5                                                                                             |
| 167693676*               | 0.00054 | COG0776 |        | Arth_3916  | bacterial nucleoid DNA-binding protein                                                                                     |
| 167818330                | 0.00048 | COG0683 |        | Rxyl_0363  | ABC-type branched-chain amino acid transport systems, periplasmic component : extracellular ligand-binding receptor        |
| 167739596                | 0.00044 | COG0545 | K03772 | BDI_2705   | FKBP-type peptidyl-prolyl cis-trans isomerases 1                                                                           |
| 167808311 <sub>c</sub>   | 0.00044 | COG0459 | K04077 | SAR11_0162 | chaperonin GroEL (HSP60 family)                                                                                            |
| 167706214                | 0.00044 | COG0683 |        | Tfu_1779   | ABC-type branched-chain amino acid transport systems, periplasmic component                                                |
| 167866918                | 0.00044 | COG2885 | K03640 | SAR11_0598 | outer membrane protein and related peptidoglycan-associated (lipo)proteins : ompA; OmpA family                             |

|                        |         |         |        |             |                                                                                                                                   |
|------------------------|---------|---------|--------|-------------|-----------------------------------------------------------------------------------------------------------------------------------|
| 167807477              | 0.00042 | COG0834 |        | MSMEG_5368  | ABC-type amino acid transport system, periplasmic component : ehuB; ectoine/hydroxyectoine ABC transporter solute-binding protein |
| 167881416 <sub>e</sub> | 0.00040 | COG0050 | K02358 | CHU_3175    | GTPases - translation elongation factors : tufB, tuf                                                                              |
| 167765645 <sub>f</sub> | 0.00034 | COG1653 | K10232 | Sare_3967   | sugar-binding periplasmic proteins/domains                                                                                        |
| 167730910              | 0.00033 | COG3181 |        | Dshi_2450   | uncharacterized BCR                                                                                                               |
| 167725574              | 0.00032 | COG0450 | K03386 | CHU_2724    | peroxiredoxin : ahpC; alkyl hydroperoxide reductase, subunit C                                                                    |
| 167768817              | 0.00032 | COG0740 | K00288 | CHU_1706    | protease subunit of ATP-dependent Clp proteases : methylenetetrahydrofolate dehydrogenase (NADP+)                                 |
| 167886236              | 0.00031 | COG0228 | K02959 | CHU_0117    | rpsP; 30S ribosomal protein S16                                                                                                   |
| 167907528              | 0.00031 | COG0591 |        | SAR11_0316  | Na <sup>+</sup> /proline, Na <sup>+</sup> /panthothenate symporters and related permeases : yjcG                                  |
| 167868396              | 0.00029 | COG2358 |        | PBPRA0389   | predicted periplasmic binding protein : putative immunogenic protein                                                              |
| 167718328              | 0.00027 | COG1744 | K07335 | AAur_1253   | surface lipoprotein : basic membrane protein A and related proteins                                                               |
| 167769503 <sub>c</sub> | 0.00027 | COG0459 |        | CMS_2756    | chaperonin GroEL (HSP60 family)                                                                                                   |
| 167818958              | 0.00026 | COG1638 |        | TM1040_0356 | dicarboxylate-binding periplasmic protein : TRAP dicarboxylate transporter - DctP subunit                                         |
| 167702878              | 0.00025 | COG1879 |        | Krad_1186   | periplasmic sugar-binding proteins : periplasmic binding protein/LacI transcriptional regulator                                   |
| 167665756              | 0.00025 | COG0091 | K02890 | GFO_2834    | rplV; 50S ribosomal protein L22                                                                                                   |
| 167730894              | 0.00023 | COG1638 |        | RD1_2185    | dicarboxylate-binding periplasmic protein : dctP; C4-dicarboxylate-binding periplasmic protein, putative                          |
| 167680092              | 0.00022 | COG0094 | K02931 | Lxx20210    | rplE; 50S ribosomal protein L5                                                                                                    |
| 167868548              | 0.00020 | COG0834 | K10018 | SAR11_1210  | ABC-type amino acid transport system, periplasmic component : octopine/nopaline transport system substrate-binding protein        |

|                        |         |         |        |            |                                                                                                                            |
|------------------------|---------|---------|--------|------------|----------------------------------------------------------------------------------------------------------------------------|
| 167892279              | 0.00019 | COG0834 | K02030 | Veis_2153  | ABC-type amino acid transport system, periplasmic component                                                                |
| 167817276              | 0.00018 | COG0347 | K04751 | Acel_1565  | nitrogen regulatory protein PII                                                                                            |
| 167862242              | 0.00018 | COG0087 | K02906 | BT_2727    | rplC; 50S ribosomal protein L3                                                                                             |
| 167933288              | 0.00018 | COG1638 |        | Dshi_3326  | dicarboxylate-binding periplasmic protein : TRAP dicarboxylate transporter-DctP subunit                                    |
| 167713980*             | 0.00016 | COG0330 | K04088 | SAR11_0008 | membrane protease subunits, stomatin/prohibitin homologs : hflK                                                            |
| 167867886              | 0.00016 | COG3181 |        | Csal_1767  | uncharacterized BCR : uncharacterized protein UPF0065                                                                      |
| 167809873              | 0.00016 | COG0539 | K02945 | CHU_1951   | rpsA; 30S ribosomal protein S1                                                                                             |
| 167713982              | 0.00015 | COG0330 | K04087 | SAR11_0007 | membrane protease subunits, stomatin/prohibitin homologs : hflC                                                            |
| 167822210              | 0.00015 | COG0776 |        | SCO2950    | bacterial nucleoid DNA-binding protein : hup, SCE59.09c; DNA-binding protein Hu (hs1)                                      |
| 167820450*             | 0.00015 | COG1192 |        | tlr0963    | ATPases involved in chromosome partitioning : probable cell division inhibitor minD                                        |
| 167820614 <sub>g</sub> | 0.00015 | COG0174 | K01915 | Krad_3291  | glutamine synthase                                                                                                         |
| 167714092              | 0.00014 | COG0683 | K01999 | SAR11_1346 | ABC-type branched-chain amino acid transport systems, periplasmic component : livJ                                         |
| 167817130              | 0.00014 | COG0711 | K02109 | SCO5369    | FOF1-type ATP synthase b subunit                                                                                           |
| 167818902              | 0.00014 | COG1638 |        | SAR11_0864 | dicarboxylate-binding periplasmic protein                                                                                  |
| 167866078              | 0.00013 | COG0605 | K00518 | Arth_2086  | superoxide dismutase                                                                                                       |
| 167865698              | 0.00013 | COG0740 | K01358 | AAur_2381  | protease subunit of ATP-dependent Clp proteases                                                                            |
| 167817852              | 0.00013 | COG0683 |        | Noca_3017  | ABC-type branched-chain amino acid transport systems, periplasmic component : extracellular ligand-binding receptor        |
| 167714042              | 0.00012 | COG0683 | K01999 | SAR11_1361 | ABC-type branched-chain amino acid transport systems, periplasmic component : livJ2; Leu/Ile/Val-binding protein precursor |

|                         |         |         |        |            |                                                                                                                                                                 |
|-------------------------|---------|---------|--------|------------|-----------------------------------------------------------------------------------------------------------------------------------------------------------------|
| 167821000               | 0.00012 | COG1732 |        | MSMEG_2924 | periplasmic glycine betaine/choline-binding (lipo)protein of an ABC-type transport system (osmoprotectant binding protein) : permease binding-protein component |
| 167668848 <sub>g</sub>  | 0.00011 | COG0174 | K01915 | CMM_1636   | glutamine synthase : glnA1                                                                                                                                      |
| 167748683*              | 0.00010 | COG0834 |        | PFL_3548   | ABC-type amino acid transport system, periplasmic component                                                                                                     |
| 167718146               | 0.00010 | COG0088 | K02926 | Lxx20320   | rplD; 50S ribosomal protein L4                                                                                                                                  |
| 167862420               | 0.00010 | COG1629 |        | FP0112     | outer membrane receptor proteins, mostly Fe transport : probable TonB-dependent outer membrane receptor precursor                                               |
| 167696080*              | 0.00010 | COG1344 | K02406 | Csac_1680  | flagellin and related hook-associated proteins                                                                                                                  |
| 167735512               | 0.00010 | COG0803 | K09815 | Smed_1697  | ABC-type Mn/Zn transport system, periplasmic Mn/Zn-binding (lipo)protein (surface adhesin A)                                                                    |
| 167719882               | 0.00009 | COG0096 | K02994 | SAR11_1103 | rpsH; 30S ribosomal protein S8                                                                                                                                  |
| 167660431 <sub>h</sub>  | 0.00009 | COG3740 | K06904 | BL0376     | phage head maturation protease                                                                                                                                  |
| 167718250               | 0.00009 | COG2213 | K02799 | GK1948     | phosphotransferase system, mannitol-specific IIBC component                                                                                                     |
| 167719862*              | 0.00008 | COG0185 | K02965 | SAR11_1113 | rpsS; 30S ribosomal protein S19                                                                                                                                 |
| 167702806               | 0.00008 | COG0081 | K02863 | KRH_05860  | rplA; 50S ribosomal protein L1                                                                                                                                  |
| 167719824* <sub>e</sub> | 0.00008 | COG0050 | K02358 | SAR11_1130 | GTPases - translation elongation factors : tufB, tuf                                                                                                            |
| 167817466               | 0.00008 | COG0404 |        | mll1258    | glycine cleavage system T protein (aminomethyltransferase) : sarcosine dehydrogenase                                                                            |
| 167868614               | 0.00008 | COG2113 | K02002 | SAR11_0797 | ABC-type proline/glycine betaine transport systems, periplasmic components : proX                                                                               |
| 167933120               | 0.00007 | COG0803 | K09815 | Atu1521    | ABC-type Mn/Zn transport system, periplasmic Mn/Zn-binding (lipo)protein (surface adhesin A) : znuA                                                             |
| 167718168               | 0.00007 | COG0094 |        | CMS_0295   | 50S ribosomal protein L5                                                                                                                                        |
| 167868724               | 0.00007 | COG0396 | K09013 | SAR11_0740 | iron-regulated ABC transporter ATPase subunit SufC                                                                                                              |

|                        |         |         |        |            |                                                                                                 |
|------------------------|---------|---------|--------|------------|-------------------------------------------------------------------------------------------------|
| 167718156              | 0.00007 | COG0092 | K02982 | Krad_0694  | ribosomal protein S3                                                                            |
| 167719956              | 0.00006 | COG0834 | K02030 | SAR11_1068 | ABC-type amino acid transport system, periplasmic component : pheC; cyclohexadienyl dehydratase |
| 167730882              | 0.00006 | COG0004 |        | SAR11_0818 | ammonia permeases : amtB; ammonium transporter                                                  |
| 167718138 <sub>e</sub> | 0.00006 | COG0050 | K02358 | Tfu_2648   | GTPases - translation elongation factors: tuf                                                   |
| 167718052              | 0.00006 | COG1653 | K02027 | Krad_3469  | sugar-binding periplasmic proteins/domains                                                      |
| 167700960*             | 0.00006 | COG3794 |        | SMa1243    | plastocyanin : Azu1 pseudoazurin (blue copper protein)                                          |
| 167868482              | 0.00005 | COG0715 |        |            | ABC-type nitrate/sulfonate/taurine/bicarbonate transport systems, periplasmic components        |
| 167868656              | 0.00005 | COG0715 | K02051 | AZC_2351   | ABC-type nitrate/sulfonate/taurine/bicarbonate transport systems, periplasmic components        |
| 167868494              | 0.00004 | COG1638 |        | SMa0157    | dicarboxylate-binding periplasmic protein                                                       |
| 167866460              | 0.00004 | COG0687 | K02055 | SCO5667    | spermidine/putrescine-binding periplasmic protein                                               |
| 167719840              | 0.00004 | COG0085 | K03043 | SAR11_1123 | DNA-directed RNA polymerase beta subunit/140 kD subunit (split gene in Mjan, Mthe, Aful) : rpoB |
| 167816636              | 0.00004 | COG0459 | K04077 | Krad_0736  | chaperonin GroEL (HSP60 family)                                                                 |
| 167701680*             | 0.00004 | COG3740 | K06904 | BL0376     | phage head maturation protease                                                                  |
| 167717794*             | 0.00003 | COG0195 | K02600 | SAR11_0388 | phage head maturation protease                                                                  |
| 167717838              | 0.00003 | COG0443 | K04043 | SAR11_0368 | molecular chaperone : dnaK                                                                      |
| 167834314              | 0.00003 | COG0443 |        | CMS_2806   | molecular chaperone : dnaK                                                                      |
| 167717784              | 0.00003 | COG1185 | K00962 | SAR11_0392 | polyribonucleotide nucleotidyltransferase (polynucleotide phosphorylase)                        |
| 167818278              | 0.00003 | COG1022 |        | Noca_3113  | long-chain acyl-CoA synthetases (AMP-forming) : AMP-dependent synthetase and ligase             |
| 167719850              | 0.00002 | COG0480 | K02355 | SAR11_1119 | translation elongation and release factors (GTPases) : fusA                                     |
| 167816480              | 0.00002 | COG0086 | K03046 | Krad_0681  | DNA-directed RNA polymerase beta' subunit/160 kD subunit (split gene in archaea and Syn)        |



| 167866408                                   | 0.00001                                      | COG1185              | K00962                   | Lxx09030                       | polyribonucleotide nucleotidyltransferase<br>(polynucleotide phosphorylase)    |
|---------------------------------------------|----------------------------------------------|----------------------|--------------------------|--------------------------------|--------------------------------------------------------------------------------|
| <b>5 m - KEGG and NR annotated proteins</b> |                                              |                      |                          |                                |                                                                                |
| <b>Gene ID</b>                              | <b>normalised<br/>spectral<br/>abundance</b> | <b>NR identifier</b> | <b>KO<br/>identifier</b> | <b>KEGG / NR Locus<br/>tag</b> | <b>KEGG / NR description</b>                                                   |
| 167873078                                   | 0.03710                                      | BAF91544             |                          |                                | major capsid protein [uncultured Myoviridae]                                   |
| 167771989 <sub>i</sub>                      | 0.02658                                      |                      |                          | BTH_I0914                      | hypothetical protein                                                           |
| 167723550 <sub>j</sub>                      | 0.01559                                      | YP_001648266         |                          | OsV5_190f                      | hypothetical protein [Ostreococcus virus OsV5]                                 |
| 167927818 <sub>j</sub>                      | 0.01345                                      | YP_001648266         |                          | OsV5_190f                      | hypothetical protein [Ostreococcus virus OsV5]                                 |
| 167933090                                   | 0.01298                                      | YP_002590925         |                          |                                | putative porin [Candidatus Pelagibacter sp.<br>HTCC7211]                       |
| 167711088                                   | 0.01230                                      |                      | K09969                   | PBPRA2185                      | putative amino acid ABC transporter, periplasmic<br>amino acid-binding protein |
| 167691398                                   | 0.01175                                      |                      |                          | HM1_2880                       | phage major capsid protein, hk97 family                                        |
| 167922719 <sub>k</sub>                      | 0.01174                                      |                      |                          | Neut_1469                      | phage major capsid protein, HK97 family protein                                |
| 167775105 <sub>i</sub>                      | 0.01103                                      | ABC95191             |                          |                                | GP23-major capsid protein [Stenotrophomonas<br>phage SMB14]                    |
| 167687982 <sub>i</sub>                      | 0.00968                                      | NP_944113            |                          |                                | gp23 major head protein [Aeromonas phage Aeh1]                                 |
| 167748599 <sub>m</sub>                      | 0.00960                                      |                      |                          | M6_Spy1138                     | phage prohead protease                                                         |
| 167733772                                   | 0.00952                                      |                      |                          | BBta_5785                      | putative phage major head protein                                              |
| 167925660                                   | 0.00923                                      |                      |                          | SRU_2178                       | putative outer membrane protein, probably involved<br>in nutrient binding      |
| 167796059 <sub>n</sub>                      | 0.00853                                      |                      |                          | APECO1_525                     | hypothetical protein                                                           |
| 167883590                                   | 0.00820                                      |                      |                          | PP_1567                        | phage major capsid protein, HK97 family                                        |
| 167666520 <sub>o</sub>                      | 0.00818                                      | BAF91544             |                          |                                | major capsid protein [uncultured Myoviridae]                                   |
| 167664173* <sub>p</sub>                     | 0.00713                                      |                      |                          | GDI3673                        | hypothetical protein                                                           |
| 167667150 <sub>m</sub>                      | 0.00687                                      |                      |                          | LGAS_1485                      | predicted phage phi-C31 GP36 major capsid-like<br>protein                      |
| 167771337                                   | 0.00605                                      | ABW90951             |                          |                                | gp23 major capsid protein [uncultured Myoviridae]                              |

|                         |         |              |  |              |                                                                        |
|-------------------------|---------|--------------|--|--------------|------------------------------------------------------------------------|
| 167884290 <sub>l</sub>  | 0.00573 | BAF91544     |  |              | major capsid protein [uncultured Myoviridae]                           |
| 167760139               | 0.00561 |              |  | CHU_2679     | probable outer membrane lipoprotein P61                                |
| 167816468 <sub>q</sub>  | 0.00522 |              |  | DR_A0099     | hypothetical protein                                                   |
| 167700634 <sub>j</sub>  | 0.00499 | YP_001648266 |  | OsV5_190f    | hypothetical protein [Ostreococcus virus OsV5]                         |
| 167687792 <sub>r</sub>  | 0.00498 |              |  | Asuc_1240    | phage major capsid protein, HK97 family                                |
| 167842580 <sub>r</sub>  | 0.00453 |              |  | BAV1464      | major capsid protein                                                   |
| 167700776               | 0.00447 |              |  | Bpro_3745    | hypothetical protein                                                   |
| 167729766               | 0.00433 | ZP_01224596  |  | GB2207_03424 | hypothetical protein [marine gamma proteobacterium HTCC2207]           |
| 167934698               | 0.00431 |              |  | Swit_4452    | hypothetical protein                                                   |
| 167884738               | 0.00409 |              |  | BBta_5785    | putative phage major head protein                                      |
| 167669610 <sub>p</sub>  | 0.00397 |              |  | GDI3673      | hypothetical protein                                                   |
| 167861688               | 0.00359 |              |  | BDI_2874     | putative outer membrane protein, probably involved in nutrient binding |
| 167910063               | 0.00347 |              |  | GDI3673      | hypothetical protein                                                   |
| 167893743* <sub>s</sub> | 0.00338 | YP_001648158 |  | OsV5_081f    | hypothetical protein [Ostreococcus virus OsV5]                         |
| 167888926 <sub>p</sub>  | 0.00326 |              |  | GDI3673      | hypothetical protein                                                   |
| 167753643*              | 0.00324 |              |  | Daci_1946    | putative phage major head protein                                      |
| 167742624 <sub>p</sub>  | 0.00317 |              |  | GDI3673      | hypothetical protein                                                   |
| 167908539 <sub>r</sub>  | 0.00304 |              |  | BAV1464      | major capsid protein                                                   |
| 167675286*              | 0.00284 |              |  | CKO_01864    | hypothetical protein                                                   |
| 167900893 <sub>n</sub>  | 0.00278 |              |  | APECO1_525   | hypothetical protein                                                   |
| 167778265 <sub>p</sub>  | 0.00275 |              |  | GDI3673      | hypothetical protein                                                   |
| 167786471               | 0.00267 |              |  | mIrr8524     | phage major capsid protein, GP36                                       |
| 167735768               | 0.00265 |              |  | FRAAL2681    | hypothetical protein                                                   |
| 167773951 <sub>t</sub>  | 0.00253 |              |  | LGAS_1485    | predicted phage phi-C31 GP36 major capsid-like protein                 |
| 167841586 <sub>j</sub>  | 0.00250 | A7U6E7       |  |              | putative major capsid protein [Chrysochromulina ericina virus]         |

|                         |         |              |  |             |                                                                               |
|-------------------------|---------|--------------|--|-------------|-------------------------------------------------------------------------------|
| 167919545               | 0.00245 |              |  | Pmen_3970   | phage major capsid protein, HK97 family                                       |
| 167781901 <sub>u</sub>  | 0.00236 | YP_214367    |  |             | T4-like major capsid protein [Prochlorococcus phage P-SSM2]                   |
| 167923659 <sub>p</sub>  | 0.00235 |              |  | GDI3673     | hypothetical protein                                                          |
| 167852301 <sub>v</sub>  | 0.00230 |              |  | MAB_1788    | bacteriophage protein                                                         |
| 167659301               | 0.00224 |              |  | LGAS_1485   | predicted phage phi-C31 GP36 major capsid-like protein                        |
| 167861686               | 0.00223 | YP_002789013 |  |             | TonB dependent/ligand-gated channel [Polaribacter sp. MED152]                 |
| 167712528 <sub>v</sub>  | 0.00215 |              |  | MAB_1788    | bacterial nucleoid DNA-binding protein                                        |
| 167678920* <sub>w</sub> | 0.00209 | YP_001498525 |  | AR158_C444L | hypothetical protein [Paramecium bursaria Chlorella virus AR158]              |
| 167849540 <sub>j</sub>  | 0.00201 | YP_001648266 |  | OsV5_190f   | hypothetical protein [Ostreococcus virus OsV5]                                |
| 167781903 <sub>u</sub>  | 0.00201 | YP_214367    |  |             | T4-like major capsid protein [Prochlorococcus phage P-SSM2]                   |
| 167863158 <sub>j</sub>  | 0.00200 | YP_001648266 |  | OsV5_190f   | hypothetical protein [Ostreococcus virus OsV5]                                |
| 167663967*              | 0.00190 |              |  | Swit_4461   | hypothetical protein                                                          |
| 167687108 <sub>u</sub>  | 0.00182 | YP_214367    |  |             | T4-like major capsid protein [Prochlorococcus phage P-SSM2]                   |
| 167692622 <sub>i</sub>  | 0.00176 |              |  | SG1188      | hypothetical protein                                                          |
| 167733858               | 0.00170 | ZP_01017474  |  |             | major capsid protein, HK97 family protein [Parvularcula bermudensis HTCC2503] |
| 167852851 <sub>p</sub>  | 0.00167 |              |  | GDI3673     | hypothetical protein                                                          |
| 167864542 <sub>k</sub>  | 0.00166 |              |  | Neut_1469   | phage major capsid protein, HK97 family protein                               |
| 167803157               | 0.00165 | ZP_01688540  |  |             | lipoprotein, putative [Microscilla marina ATCC 23134]                         |
| 167682644 <sub>j</sub>  | 0.00153 | A7U6E7       |  |             | putative major capsid protein [Chrysochromulina ericina virus]                |
| 167733004* <sub>j</sub> | 0.00150 | A7U6F0       |  |             | putative major capsid protein [Phaeocystis pouchetii virus]                   |

|                          |         |              |  |            |                                                             |
|--------------------------|---------|--------------|--|------------|-------------------------------------------------------------|
| 167765429                | 0.00148 |              |  | CHU_2610   | gliding motility-related protein; possible GldN and/or GldO |
| 167878228 <sub>t</sub>   | 0.00145 |              |  | LGAS_1485  | predicted phage phi-C31 GP36 major capsid-like protein      |
| 167775103                | 0.00145 | YP_214669    |  |            | gp23 [Prochlorococcus phage P-SSM4]                         |
| 167702908                | 0.00143 |              |  | mma_2202   | hypothetical protein                                        |
| 167869946                | 0.00135 | YP_195142    |  |            | major capsid protein gp23 [Synechococcus phage S-PM2]       |
| 167834518                | 0.00128 |              |  | Haur_0657  | hypothetical protein                                        |
| 167807747                | 0.00122 |              |  | Saro_0657  | hypothetical protein                                        |
| 167816420                | 0.00121 |              |  | APECO1_525 | hypothetical protein                                        |
| 167809283 <sub>k</sub>   | 0.00119 |              |  | Neut_1469  | phage major capsid protein, HK97 family protein             |
| 167868514                | 0.00119 |              |  | SAR11_1290 | TRAP-type bacterial extracellular solute-binding protein    |
| 167750765                | 0.00118 |              |  | Smed_1334  | phage major capsid protein, HK97 family                     |
| 167925457 <sub>p</sub>   | 0.00115 |              |  | GDI3673    | hypothetical protein                                        |
| 167782759                | 0.00113 |              |  | Oter_1957  | band 7 protein                                              |
| 167871794 <sub>j</sub>   | 0.00113 | YP_001648266 |  | OsV5_190f  | hypothetical protein [Ostreococcus virus OsV5]              |
| 167756019                | 0.00112 |              |  | CHU_0172   | gldL; gliding motility-related protein                      |
| 167670926 <sub>x</sub>   | 0.00112 |              |  | BBta_5785  | putative phage major head protein                           |
| 167821362 <sub>z</sub>   | 0.00112 |              |  | APECO1_525 | hypothetical protein                                        |
| 167690910 <sub>j</sub>   | 0.00111 | YP_001648266 |  | OsV5_190f  | hypothetical protein [Ostreococcus virus OsV5]              |
| 167685332 <sub>j</sub>   | 0.00110 | YP_001648266 |  | OsV5_190f  | hypothetical protein [Ostreococcus virus OsV5]              |
| 167700460*               | 0.00110 | YP_001648158 |  | OsV5_081f  | hypothetical protein [Ostreococcus virus OsV5]              |
| 167685474* <sub>aa</sub> | 0.00104 | YP_001648182 |  | OsV5_105r  | hypothetical protein [Ostreococcus virus OsV5]              |
| 167734326bb              | 0.00103 |              |  | amb4267    | hypothetical protein                                        |
| 16775653 <sub>q</sub>    | 0.00101 |              |  | Haur_0657  | hypothetical protein                                        |
| 167733302 <sub>p</sub>   | 0.00101 |              |  | GDI3673    | hypothetical protein                                        |

|                         |         |              |        |                |                                                               |
|-------------------------|---------|--------------|--------|----------------|---------------------------------------------------------------|
| 167663981 <sub>p</sub>  | 0.00097 |              |        | GDI3673        | hypothetical protein                                          |
| 167763843               | 0.00096 |              |        | Saro_0657      | hypothetical protein                                          |
| 167768193 <sub>z</sub>  | 0.00096 |              |        | CKO_01864      | hypothetical protein                                          |
| 167719228 <sub>i</sub>  | 0.00095 |              |        | SG1188         | hypothetical protein                                          |
| 167844676               | 0.00091 | ZP_03643684  |        | BACCOPRO_02057 | hypothetical protein [Bacteroides coprophilus DSM 18228]      |
| 167881504 <sub>cc</sub> | 0.00091 |              |        | BSU26140       | yqbE; hypothetical protein                                    |
| 167852559 <sub>oo</sub> | 0.00090 |              |        | HSM_0907       | hypothetical protein                                          |
| 167804465*              | 0.00088 | ZP_03724502  |        | ObacDRAFT_9001 | hypothetical protein [Opitutaceae bacterium TAV2]             |
| 167794165 <sub>p</sub>  | 0.00087 |              |        | GDI3673        | hypothetical protein                                          |
| 167734676               | 0.00085 |              |        | Amet_4028      | phage major capsid protein, HK97 family                       |
| 167764813 <sub>u</sub>  | 0.00084 | YP_214367    |        |                | T4-like major capsid protein [Prochlorococcus phage P-SSM2]   |
| 167781783 <sub>p</sub>  | 0.00079 |              |        | GDI3673        | hypothetical protein                                          |
| 167759955               | 0.00077 |              |        | Dgeo_0628      | hypothetical protein                                          |
| 167733674               | 0.00076 |              |        | Swit_4452      | hypothetical protein                                          |
| 167878828               | 0.00075 |              | K02027 | SAV1394        | ABC transporter solute-binding protein                        |
| 167740142               | 0.00075 | YP_002705257 |        |                | gp34 [Stenotrophomonas sp. SKA14]                             |
| 167834088               | 0.00074 |              |        | Haur_0657      | hypothetical protein                                          |
| 167821604 <sub>j</sub>  | 0.00072 | YP_001648266 |        | OsV5_190f      | hypothetical protein [Ostreococcus virus OsV5]                |
| 167798697 <sub>p</sub>  | 0.00070 |              |        | GDI3673        | hypothetical protein                                          |
| 167823322 <sub>s</sub>  | 0.00070 | YP_001648158 |        | OsV5_081f      | hypothetical protein [Ostreococcus virus OsV5]                |
| 167718758 <sub>j</sub>  | 0.00070 | A7U6F0       |        |                | putative major capsid protein [Phaeocystis pouchetii virus]   |
| 167713806               | 0.00069 |              |        | SG1188         | hypothetical protein                                          |
| 167778269 <sub>dd</sub> | 0.00068 | YP_002276820 |        | Gdia_2460      | hypothetical protein [Gluconacetobacter diazotrophicus PAI 5] |
| 167879936 <sub>s</sub>  | 0.00067 | YP_001648158 |        | OsV5_081f      | hypothetical protein [Ostreococcus virus OsV5]                |
| 167701850               | 0.00064 |              |        | M446_5960      | hypothetical protein                                          |

|                         |         |              |        |                |                                                              |
|-------------------------|---------|--------------|--------|----------------|--------------------------------------------------------------|
| 167934792 <sub>p</sub>  | 0.00064 |              |        | GDI3673        | hypothetical protein                                         |
| 167874674               | 0.00063 |              |        | GFO_0492       | conserved hypothetical protein, secreted-possibly porin      |
| 167821292               | 0.00062 |              |        | Oant_1504      | peptidase U35 phage prohead HK97                             |
| 167867556               | 0.00062 |              |        | Rru_A2587      | hypothetical protein                                         |
| 167901481               | 0.00061 |              |        | Cthe_1719      | phage major capsid protein, HK97 family                      |
| 167824444               | 0.00059 |              |        | Smed_5134      | TRAP dicarboxylate transporter-DctP subunit                  |
| 167696166*              | 0.00059 |              |        | BTH_I0915      | hypothetical protein                                         |
| 167936648               | 0.00056 | EEI06235     |        | XcelDRAFT_1815 | hypothetical protein [Xylanimonas cellulositytica DSM 15894] |
| 167910361 <sub>j</sub>  | 0.00054 | A7U6F0       |        |                | putative major capsid protein [Phaeocystis pouchetii virus]  |
| 167675492* <sub>p</sub> | 0.00054 |              |        | GDI3673        | hypothetical protein                                         |
| 167801933 <sub>aa</sub> | 0.00052 | YP_001648182 |        | OsV5_105r      | hypothetical protein [Ostreococcus virus OsV5]               |
| 167725772 <sub>cc</sub> | 0.00051 |              |        | BSU26140       | yqbE; hypothetical protein                                   |
| 167820670               | 0.00050 |              |        | gll0198        | similar to bacteriorhodopsin                                 |
| 167832972 <sub>t</sub>  | 0.00050 |              |        | LGAS_1485      | predicted phage phi-C31 GP36 major capsid-like protein       |
| 167867536               | 0.00049 |              |        | TM1040_0812    | hypothetical protein                                         |
| 167783747               | 0.00048 |              |        | Glov_2914      | cell surface receptor IPT/TIG domain protein                 |
| 167893945               | 0.00048 |              |        | Oter_3420      | hypothetical protein                                         |
| 167740708               | 0.00047 |              | K03286 | Pnap_1319      | OmpA/MotB domain protein; OmpA-OmpF porin, OOP family        |
| 167772783               | 0.00047 |              |        | RCIX1696       | hypothetical protein                                         |
| 167734614 <sub>p</sub>  | 0.00047 |              |        | GDI3673        | hypothetical protein                                         |
| 167776587*              | 0.00046 | YP_001648249 |        | OsV5_172f      | hypothetical protein [Ostreococcus virus OsV5]               |
| 167911245 <sub>s</sub>  | 0.00046 | YP_001648315 |        | OsV5_239r      | hypothetical protein [Ostreococcus virus OsV5]               |
| 167867748 <sub>x</sub>  | 0.00044 |              |        | Daci_1946      | putative phage major head protein                            |
| 167732694               | 0.00044 |              |        | NMC0858        | putative phage-related protein                               |
| 167922873               | 0.00042 |              |        | CHU_3230       | hypothetical protein                                         |

|                          |         |              |        |                  |                                                                              |
|--------------------------|---------|--------------|--------|------------------|------------------------------------------------------------------------------|
| 167734178 <sub>p</sub>   | 0.00041 |              |        | GDI3673          | hypothetical protein                                                         |
| 167873260                | 0.00041 |              |        | Sare_3763        | hypothetical protein                                                         |
| 167685638* <sub>w</sub>  | 0.00041 | YP_001498525 |        | AR158_C444L      | hypothetical protein [Paramecium bursaria Chlorella virus AR158]             |
| 167901149                | 0.00040 |              | K01358 | azo1870          | endopeptidase Clp; K01358 ATP-dependent Clp protease, protease subunit       |
| 167853099 <sub>i</sub>   | 0.00040 |              |        | SG1188           | hypothetical protein                                                         |
| 167761349 <sub>x</sub>   | 0.00037 |              |        | Daci_1946        | putative phage major head protein                                            |
| 167776241                | 0.00037 |              |        | mll0455          | hypothetical protein                                                         |
| 167824154                | 0.00036 |              |        | SACE_4894        | hydrolase, alpha/beta fold family                                            |
| 167843578 <sub>s</sub>   | 0.00035 | YP_001648158 |        | OsV5_081f        | hypothetical protein [Ostreococcus virus OsV5]                               |
| 167682808*               | 0.00035 | YP_001648239 |        | OsV5_162f        | hypothetical protein [Ostreococcus virus OsV5]                               |
| 167703228                | 0.00034 |              |        | Dshi_0412        | beta-Ig-H3/fasciclin                                                         |
| 167918033 <sub>p</sub>   | 0.00034 |              |        | GDI3673          | hypothetical protein                                                         |
| 167891224 <sub>p</sub>   | 0.00033 |              |        | GDI3673          | hypothetical protein                                                         |
| 167867622                | 0.00033 |              |        | Oant_1504        | peptidase U35 phage prohead HK97                                             |
| 167732430 <sub>ff</sub>  | 0.00031 | ZP_02092868  |        | FAEPRAM212_03171 | hypothetical protein [Faecalibacterium prausnitzii M21/2]                    |
| 167684500 <sub>s</sub>   | 0.00031 | YP_001648158 |        | OsV5_081f        | hypothetical protein [Ostreococcus virus OsV5]                               |
| 167824164*               | 0.00030 | YP_001648240 |        | OsV5_163f        | hypothetical protein [Ostreococcus virus OsV5]                               |
| 167765431                | 0.00030 |              |        | CHU_0173         | gldM; gliding motility-related protein                                       |
| 167854137                | 0.00030 | ZP_00743477  |        | RBTH_08297       | hypothetical protein [Bacillus thuringiensis serovar israelensis ATCC 35646] |
| 167730288 <sub>k</sub>   | 0.00028 |              |        | Neut_1469        | phage major capsid protein, HK97 family protein                              |
| 167685472* <sub>gg</sub> | 0.00027 | YP_001648184 |        | OsV5_107r        | hypothetical protein [Ostreococcus virus OsV5]                               |
| 167778267 <sub>p</sub>   | 0.00027 |              |        | GDI3673          | hypothetical protein                                                         |
| 167919557                | 0.00027 |              |        | PputW619_3936    | hypothetical protein                                                         |
| 167782645                | 0.00026 |              |        | BBta_5785        | putative phage major head protein                                            |

|                          |         |              |        |                  |                                                           |
|--------------------------|---------|--------------|--------|------------------|-----------------------------------------------------------|
| 167908551                | 0.00026 |              |        | CC_2781          | hypothetical protein                                      |
| 16786723 <sub>p</sub>    | 0.00026 |              |        | GDI3673          | hypothetical protein                                      |
| 167896531                | 0.00026 |              |        | BAV1464          | major capsid protein                                      |
| 167821374                | 0.00025 | YP_001919460 |        | Mpop_5468        | hypothetical protein [Methylobacterium populi BJ001]      |
| 167833472                | 0.00024 |              |        | GDI3673          | hypothetical protein                                      |
| 167733210                | 0.00024 |              |        | Pmen_3970        | phage major capsid protein, HK97 family                   |
| 167713652*               | 0.00023 |              |        | mlr8533          | hypothetical protein                                      |
| 167935700 <sub>p</sub>   | 0.00023 |              |        | GDI3673          | hypothetical protein                                      |
| 167872214<br>hh          | 0.00023 |              | K06907 | Sfum_3815        | phage tail sheath protein                                 |
| 167881636                | 0.00023 |              |        | Rsph17025_0103   | hypothetical protein                                      |
| 167791200 <sub>p</sub>   | 0.00023 |              |        | GDI3673          | hypothetical protein                                      |
| 167922981 <sub>p</sub>   | 0.00022 |              |        | GDI3673          | hypothetical protein                                      |
| 167824604                | 0.00022 |              |        | Rsph17029_3578   | uncharacterized protein UPF0065                           |
| 167933608 <sub>ff</sub>  | 0.00022 | ZP_02092868  |        | FAEPRAM212_03171 | hypothetical protein [Faecalibacterium prausnitzii M21/2] |
| 167817058                | 0.00022 |              | K00518 | Sare_4077        | superoxide dismutase                                      |
| 167823358* <sub>gg</sub> | 0.00021 | YP_001648184 |        | OsV5_107r        | hypothetical protein [Ostreococcus virus OsV5]            |
| 167892855                | 0.00021 | YP_001648184 |        | OsV5_107r        | hypothetical protein [Ostreococcus virus OsV5]            |
| 167840790                | 0.00021 |              |        | Rsph17025_0437   | hypothetical protein                                      |
| 167712150* <sub>s</sub>  | 0.00021 | YP_001648158 |        | OsV5_081f        | hypothetical protein [Ostreococcus virus OsV5]            |
| 167833160 <sub>bb</sub>  | 0.00021 |              |        | amb4267          | hypothetical protein                                      |
| 167892985 <sub>j</sub>   | 0.00021 | YP_001648266 |        | OsV5_190f        | hypothetical protein [Ostreococcus virus OsV5]            |
| 167696294 <sub>oo</sub>  | 0.00020 |              |        | HS_1377          | hypothetical protein                                      |
| 167759041                | 0.00019 |              |        | PP_3877          | hypothetical protein                                      |
| 167766087 <sub>s</sub>   | 0.00019 | YP_001648153 |        | OsV5_076f        | hypothetical protein [Ostreococcus virus OsV5]            |



|              |         |              |        |                |                                                                                                           |
|--------------|---------|--------------|--------|----------------|-----------------------------------------------------------------------------------------------------------|
| 167919775    | 0.00019 | YP_001294637 |        | ORF044         | hypothetical protein [Pseudomonas phage PA11]                                                             |
| 167804453*   | 0.00017 | ZP_03724505  |        | ObacDRAFT_9004 | hypothetical protein [Opitutaceae bacterium TAV2]                                                         |
| 167833104    | 0.00017 |              |        | Bcep1808_1173  | hypothetical protein                                                                                      |
| 167721370*   | 0.00016 | YP_001648301 |        | OsV5_225r      | hypothetical protein [Ostreococcus virus OsV5]                                                            |
| 167826943*   | 0.00016 |              |        | Sare_3763      | hypothetical protein                                                                                      |
| 167865492    | 0.00015 |              | K02027 | Pput_3473      | extracellular solute-binding protein, family 1; multiple sugar transport system substrate-binding protein |
| 167685780*_j | 0.00015 | YP_001648266 |        | OsV5_190f      | hypothetical protein [Ostreococcus virus OsV5]                                                            |
| 167910713    | 0.00014 |              |        | Bd1641         | hypothetical protein                                                                                      |
| 167910061_p  | 0.00014 |              |        | GDI3673        | hypothetical protein                                                                                      |
| 167833358_s  | 0.00013 | YP_001648158 |        | OsV5_081f      | hypothetical protein [Ostreococcus virus OsV5]                                                            |
| 167692314*_w | 0.00012 | YP_001498525 |        | AR158_C444L    | hypothetical protein [Paramecium bursaria Chlorella virus AR158]                                          |
| 167925393    | 0.00012 |              |        | Oter_3421      | hypothetical protein                                                                                      |
| 167687436    | 0.00011 |              | K01999 | azo3443        | conserved hypothetical ABC-type branched-chain amino acid transport systems, periplasmic component        |
| 167719658hh  | 0.00011 |              | K06907 | Dde_1889       | hypothetical protein                                                                                      |
| 167668360_s  | 0.00011 | YP_001648158 |        | OsV5_081f      | hypothetical protein [Ostreococcus virus OsV5]                                                            |
| 167735772    | 0.00010 |              |        | FRAAL2683      | hypothetical protein; putative mycobacteriophage protein (GP15) similarity                                |
| 167702102    | 0.00010 |              |        | Daci_1946      | putative phage major head protein                                                                         |
| 167688622_p  | 0.00009 |              |        | GDI3673        | hypothetical protein                                                                                      |
| 167782867_cc | 0.00009 |              |        | BSU26140       | yqbE; hypothetical protein                                                                                |
| 167867386    | 0.00008 |              |        | TM1040_1299    | peptidase U35, phage prohead HK97                                                                         |
| 167789595    | 0.00008 |              |        | APECO1_4044    | hypothetical protein                                                                                      |
| 167828425*_w | 0.00007 | YP_001498525 |        | AR158_C444L    | hypothetical protein [Paramecium bursaria Chlorella virus AR158]                                          |

|                                          |         |              |        |              |                                                                                                                 |
|------------------------------------------|---------|--------------|--------|--------------|-----------------------------------------------------------------------------------------------------------------|
| 167865490                                | 0.00007 |              | K02027 | Rmet_2229    | extracellular solute-binding protein, family 1;<br>multiple sugar transport system substrate-binding<br>protein |
| 167840812                                | 0.00006 | ZP_01959135  |        | BACCAC_00731 | hypothetical protein [Bacteroides caccae ATCC<br>43185]                                                         |
| 167706428                                | 0.00005 | YP_001648190 |        | OsV5_113r    | hypothetical protein [Ostreococcus virus OsV5]                                                                  |
| 167867920 <sub>p</sub>                   | 0.00005 |              |        | GDI3673      | hypothetical protein                                                                                            |
| 167842648* <sub>s</sub>                  | 0.00005 | YP_001648315 |        | OsV5_239r    | hypothetical protein [Ostreococcus virus OsV5]                                                                  |
| 167869096 <sub>w</sub>                   | 0.00005 | YP_001498525 |        | AR158_C444L  | hypothetical protein [Paramecium bursaria Chlorella<br>virus AR158]                                             |
| 167859444                                | 0.00005 | YP_001648151 |        | OsV5_074f    | hypothetical protein [Ostreococcus virus OsV5]                                                                  |
| 167871600                                | 0.00005 | YP_001648152 |        | OsV5_075f    | hypothetical protein [Ostreococcus virus OsV5]                                                                  |
| 167669608 <sub>p</sub>                   | 0.00004 |              |        | GDI3673      | hypothetical protein                                                                                            |
| 167678686 <sub>p</sub>                   | 0.00004 |              |        | GDI3673      | hypothetical protein                                                                                            |
| 167752119                                | 0.00004 | YP_001648152 |        | OsV5_075f    | hypothetical protein [Ostreococcus virus OsV5]                                                                  |
| 167825992 <sub>j</sub>                   | 0.00003 | A7U6E7       |        |              | putative major capsid protein [Chrysochromulina<br>ericina virus]                                               |
| 167818634                                | 0.00003 |              |        | PputGB1_1751 | hypothetical protein                                                                                            |
| 167671778*                               | 0.00003 | YP_001648124 |        | OsV5_047f    | hypothetical protein [Ostreococcus virus OsV5]                                                                  |
| 167871626 <sub>s</sub>                   | 0.00002 | YP_001648158 |        | OsV5_081f    | hypothetical protein [Ostreococcus virus OsV5]                                                                  |
| 167753841                                | 0.00002 |              | K06907 | Sfum_3815    | phage tail sheath protein                                                                                       |
| 167724632*                               | 0.00002 | YP_001648232 |        | OsV5_155f    | hypothetical protein [Ostreococcus virus OsV5]                                                                  |
| 167690816                                | 0.00002 | YP_001648190 |        | OsV5_113r    | hypothetical protein [Ostreococcus virus OsV5]                                                                  |
| 167742884*                               | 0.00001 |              |        | Dvul_0646    | hypothetical protein                                                                                            |
| 167875342 <sub>j</sub>                   | 0.00001 | YP_001648145 |        | OsV5_068f    | hypothetical protein [Ostreococcus virus OsV5]                                                                  |
| <b>5 m - Proteins with no annotation</b> |         |              |        |              |                                                                                                                 |
| 167699580*                               | 0.01263 |              |        |              |                                                                                                                 |
| 167736790 <sub>ii</sub>                  | 0.01043 |              |        |              |                                                                                                                 |
| 167796769                                | 0.00914 |              |        |              |                                                                                                                 |
| 167722626 <sub>jj</sub>                  | 0.00789 |              |        |              |                                                                                                                 |

|                          |         |  |  |  |  |
|--------------------------|---------|--|--|--|--|
| 167703824 <sub>pp</sub>  | 0.00714 |  |  |  |  |
| 167753801                | 0.00626 |  |  |  |  |
| 167854251                | 0.00577 |  |  |  |  |
| 167744898* <sub>o</sub>  | 0.00546 |  |  |  |  |
| 167664175* <sub>nn</sub> | 0.00514 |  |  |  |  |
| 167829145 <sub>pp</sub>  | 0.00433 |  |  |  |  |
| 167779175 <sub>pp</sub>  | 0.00423 |  |  |  |  |
| 167881060 <sub>pp</sub>  | 0.00419 |  |  |  |  |
| 167887022 <sub>pp</sub>  | 0.00390 |  |  |  |  |
| 167836216 <sub>jj</sub>  | 0.00369 |  |  |  |  |
| 167688044 <sub>p</sub>   | 0.00353 |  |  |  |  |
| 167697984 <sub>pp</sub>  | 0.00321 |  |  |  |  |
| 167855765 <sub>jj</sub>  | 0.00318 |  |  |  |  |
| 167764897 <sub>jj</sub>  | 0.00297 |  |  |  |  |
| 167718436                | 0.00240 |  |  |  |  |
| 167771817                | 0.00226 |  |  |  |  |
| 167699330*               | 0.00220 |  |  |  |  |
| 167891152 <sub>pp</sub>  | 0.00207 |  |  |  |  |
| 167844558 <sub>pp</sub>  | 0.00197 |  |  |  |  |
| 167801097 <sub>pp</sub>  | 0.00197 |  |  |  |  |
| 167891908                | 0.00196 |  |  |  |  |
| 167820168 <sub>ii</sub>  | 0.00192 |  |  |  |  |
| 167688624                | 0.00182 |  |  |  |  |
| 167746546 <sub>jj</sub>  | 0.00176 |  |  |  |  |
| 167682238 <sub>p</sub>   | 0.00175 |  |  |  |  |

|                          |         |  |  |  |  |
|--------------------------|---------|--|--|--|--|
| 167722606                | 0.00164 |  |  |  |  |
| 167883488 <sub>pp</sub>  | 0.00157 |  |  |  |  |
| 167839862 <sub>mm</sub>  | 0.00139 |  |  |  |  |
| 167820406*               | 0.00139 |  |  |  |  |
| 167858104                | 0.00138 |  |  |  |  |
| 167806741 <sub>jj</sub>  | 0.00138 |  |  |  |  |
| 167678192                | 0.00133 |  |  |  |  |
| 167706644                | 0.00133 |  |  |  |  |
| 167787801* <sub>ll</sub> | 0.00124 |  |  |  |  |
| 167781039                | 0.00124 |  |  |  |  |
| 167936638                | 0.00116 |  |  |  |  |
| 167733554                | 0.00116 |  |  |  |  |
| 167918031                | 0.00112 |  |  |  |  |
| 167790652                | 0.00110 |  |  |  |  |
| 167734428                | 0.00102 |  |  |  |  |
| 167925455                | 0.00102 |  |  |  |  |
| 167928078                | 0.00100 |  |  |  |  |
| 167682970 <sub>o</sub>   | 0.00098 |  |  |  |  |
| 167701282                | 0.00091 |  |  |  |  |
| 167867140 <sub>o</sub>   | 0.00087 |  |  |  |  |
| 167809975 <sub>jj</sub>  | 0.00087 |  |  |  |  |
| 167750727                | 0.00082 |  |  |  |  |
| 167883564 <sub>ll</sub>  | 0.00082 |  |  |  |  |
| 167789467 <sub>pp</sub>  | 0.00080 |  |  |  |  |
| 167669606                | 0.00078 |  |  |  |  |
| 167733300                | 0.00076 |  |  |  |  |
| 167750389 <sub>jj</sub>  | 0.00072 |  |  |  |  |

|                         |         |  |  |  |  |
|-------------------------|---------|--|--|--|--|
| 167852849               | 0.00072 |  |  |  |  |
| 167827017               | 0.00070 |  |  |  |  |
| 167691436               | 0.00068 |  |  |  |  |
| 167816466*              | 0.00067 |  |  |  |  |
| 167678688               | 0.00063 |  |  |  |  |
| 167796679               | 0.00062 |  |  |  |  |
| 167761163               | 0.00059 |  |  |  |  |
| 167916021 <sub>pp</sub> | 0.00059 |  |  |  |  |
| 167867918               | 0.00058 |  |  |  |  |
| 167853885               | 0.00058 |  |  |  |  |
| 167757667               | 0.00053 |  |  |  |  |
| 167922983               | 0.00052 |  |  |  |  |
| 167923663 <sub>nn</sub> | 0.00051 |  |  |  |  |
| 167922109               | 0.00051 |  |  |  |  |
| 167661777               | 0.00051 |  |  |  |  |
| 167936684               | 0.00050 |  |  |  |  |
| 167867228               | 0.00050 |  |  |  |  |
| 167791202               | 0.00049 |  |  |  |  |
| 167819274               | 0.00046 |  |  |  |  |
| 167765833*              | 0.00045 |  |  |  |  |
| 167793451*              | 0.00045 |  |  |  |  |
| 167732910               | 0.00043 |  |  |  |  |
| 167890226               | 0.00043 |  |  |  |  |
| 167718438               | 0.00042 |  |  |  |  |
| 167688708               | 0.00041 |  |  |  |  |
| 167699600 <sub>pp</sub> | 0.00041 |  |  |  |  |
| 167746630               | 0.00040 |  |  |  |  |
| 167821290               | 0.00039 |  |  |  |  |
| 167916161*              | 0.00038 |  |  |  |  |

|                         |         |  |  |  |  |
|-------------------------|---------|--|--|--|--|
| 167700778               | 0.00037 |  |  |  |  |
| 167701632 <sub>kk</sub> | 0.00037 |  |  |  |  |
| 167675494*              | 0.00036 |  |  |  |  |
| 167711820               | 0.00034 |  |  |  |  |
| 167663983               | 0.00033 |  |  |  |  |
| 167689444*              | 0.00032 |  |  |  |  |
| 167933464 <sub>nn</sub> | 0.00032 |  |  |  |  |
| 167891222               | 0.00032 |  |  |  |  |
| 167852557               | 0.00031 |  |  |  |  |
| 167843828               | 0.00031 |  |  |  |  |
| 167843020               | 0.00031 |  |  |  |  |
| 167677672               | 0.00030 |  |  |  |  |
| 167776503*              | 0.00028 |  |  |  |  |
| 167804815               | 0.00027 |  |  |  |  |
| 167713808               | 0.00027 |  |  |  |  |
| 167702310 <sub>dd</sub> | 0.00026 |  |  |  |  |
| 167913463 <sub>o</sub>  | 0.00025 |  |  |  |  |
| 167881302               | 0.00025 |  |  |  |  |
| 167907624 <sub>mm</sub> | 0.00025 |  |  |  |  |
| 167753609*              | 0.00024 |  |  |  |  |
| 167829571               | 0.00024 |  |  |  |  |
| 167921665               | 0.00024 |  |  |  |  |
| 167920645               | 0.00023 |  |  |  |  |
| 167714058               | 0.00022 |  |  |  |  |
| 167677546*              | 0.00021 |  |  |  |  |
| 167913465               | 0.00020 |  |  |  |  |
| 167697624*              | 0.00020 |  |  |  |  |
| 167912083 <sub>jj</sub> | 0.00019 |  |  |  |  |

|                         |         |  |  |  |  |
|-------------------------|---------|--|--|--|--|
| 167766043*              | 0.00018 |  |  |  |  |
| 167678558*              | 0.00018 |  |  |  |  |
| 167733556               | 0.00017 |  |  |  |  |
| 167663383*              | 0.00016 |  |  |  |  |
| 167905220*              | 0.00015 |  |  |  |  |
| 167891594               | 0.00015 |  |  |  |  |
| 167883594 <sub>ll</sub> | 0.00015 |  |  |  |  |
| 167879460               | 0.00014 |  |  |  |  |
| 167919777               | 0.00014 |  |  |  |  |
| 167884588 <sub>o</sub>  | 0.00014 |  |  |  |  |
| 167822810               | 0.00013 |  |  |  |  |
| 167713494               | 0.00012 |  |  |  |  |
| 167841896*              | 0.00010 |  |  |  |  |
| 167804467*              | 0.00010 |  |  |  |  |
| 167925043 <sub>kk</sub> | 0.00010 |  |  |  |  |
| 167858106               | 0.00009 |  |  |  |  |
| 167788223*              | 0.00009 |  |  |  |  |
| 167878206               | 0.00008 |  |  |  |  |
| 167764895 <sub>jj</sub> | 0.00008 |  |  |  |  |
| 167767179               | 0.00008 |  |  |  |  |
| 167858640               | 0.00008 |  |  |  |  |
| 167683530*              | 0.00007 |  |  |  |  |
| 167918035               | 0.00006 |  |  |  |  |
| 167766125*              | 0.00006 |  |  |  |  |
| 167752051*              | 0.00005 |  |  |  |  |
| 167890228               | 0.00004 |  |  |  |  |
| 167685654*              | 0.00003 |  |  |  |  |
| 167719670*              | 0.00002 |  |  |  |  |
| 167879450               | 0.00002 |  |  |  |  |

11.5 m - COG annotated proteins

| Gene ID                | normalised spectral abundance | COG identifier | KO identifier | KEGG locus tag | COG description : KEGG description                                                                                            |
|------------------------|-------------------------------|----------------|---------------|----------------|-------------------------------------------------------------------------------------------------------------------------------|
| 163207432              | 0.01734                       | COG0834        | K09969        | SAR11_0953     | ABC-type amino acid transport system, periplasmic component : yhdW                                                            |
| 163201696              | 0.01011                       | COG1879        |               | MSMEG_1374     | periplasmic sugar-binding proteins : ribose ABC transporter, periplasmic binding protein                                      |
| 163136433              | 0.00671                       | COG3409        |               | Clos_2845      | putative peptidoglycan-binding domain-containing protein                                                                      |
| 163539247              | 0.00629                       | COG1653        |               | Noca_3914      | sugar-binding periplasmic proteins/domains : extracellular solute-binding protein, family 1                                   |
| 163377029 <sub>a</sub> | 0.00566                       | COG0050        | K02358        | amb3148        | GTPases - translation elongation factors : tuf                                                                                |
| 163451248 <sub>b</sub> | 0.00541                       | COG0715        | K02051        | SAR11_0807     | ABC-type nitrate/sulfonate/taurine/bicarbonate transport systems, periplasmic components                                      |
| 163135049 <sub>c</sub> | 0.00533                       | COG1638        |               | SAR11_0266     | dicarboxylate-binding periplasmic protein : TRAP dicarboxylate transporter - DctP subunit (mannitol/chloroaromatic compounds) |
| 163451084              | 0.00531                       | COG2113        | K02002        | SAR11_1302     | ABC-type proline/glycine betaine transport systems, periplasmic components : opuAC                                            |
| 163117735              | 0.00526                       | COG2113        | K02001        | Plav_1066      | ABC-type proline/glycine betaine transport systems, periplasmic components                                                    |
| 163198494 <sub>d</sub> | 0.00415                       | COG0591        |               | SAR11_0316     | Na <sup>+</sup> /proline, Na <sup>+</sup> /panthothenate symporters and related permeases : yjcG                              |
| 163416423*             | 0.00371                       | COG0776        | K03530        | SAR11_0817     | bacterial nucleoid DNA-binding protein : hupA                                                                                 |
| 163442042              | 0.00364                       | COG0687        | K02055        | SAR11_1336     | spermidine/putrescine-binding periplasmic protein : potD                                                                      |
| 163208342 <sub>e</sub> | 0.00356                       | COG0834        | K09969        | HCH_05807      | ABC-type amino acid transport system, periplasmic component                                                                   |
| 163234668*             | 0.00338                       | COG0450        |               | SPO3383        | peroxiredoxin : thiol-specific antioxidant protein                                                                            |



|                        |         |         |        |             |                                                                                                                               |
|------------------------|---------|---------|--------|-------------|-------------------------------------------------------------------------------------------------------------------------------|
| 163261506              | 0.00336 | COG1638 |        | SAR11_0864  | dicarboxylate-binding periplasmic protein                                                                                     |
| 163104605              | 0.00336 | COG2213 | K02799 | GK1948      | phosphotransferase system, mannitol-specific IIBC component                                                                   |
| 163357996 <sub>c</sub> | 0.00321 | COG1638 |        | SAR11_0266  | dicarboxylate-binding periplasmic protein : TRAP dicarboxylate transporter - DctP subunit (mannitol/chloroaromatic compounds) |
| 163381848 <sub>f</sub> | 0.00314 | COG0459 | K04077 | SAR11_0162  | chaperonin GroEL (HSP60 family)                                                                                               |
| 163145053              | 0.00312 | COG0683 | K01999 | SAR11_1361  | ABC-type branched-chain amino acid transport systems, periplasmic component : livJ2; Leu/Ile/Val-binding protein precursor    |
| 163388714              | 0.00282 | COG1638 |        | RD1_2185    | dicarboxylate-binding periplasmic protein : DctP; C4-dicarboxylate-binding periplasmic protein, putative                      |
| 163450920              | 0.00247 | COG0683 | K01999 | SAR11_1361  | ABC-type branched-chain amino acid transport systems, periplasmic component : livJ2; Leu/Ile/Val-binding protein precursor    |
| 163240441              | 0.00246 | COG1653 | K02027 | PfIO1_3630  | sugar-binding periplasmic proteins/domains                                                                                    |
| 163275955              | 0.00241 | COG1638 |        | TM1040_0356 | dicarboxylate-binding periplasmic protein : TRAP dicarboxylate transporter - DctP subunit                                     |
| 163449626              | 0.00229 | COG1638 |        | Dshi_3326   | dicarboxylate-binding periplasmic protein : TRAP dicarboxylate transporter, DctP subunit                                      |
| 163450966              | 0.00228 | COG0687 | K02055 | SAR11_1336  | spermidine/putrescine-binding periplasmic protein : potD                                                                      |
| 163174786              | 0.00223 | COG2358 |        | PBPRA0389   | predicted periplasmic binding protein : putative immunogenic protein                                                          |
| 163120641              | 0.00219 | COG1879 | K02058 | CMM_0792    | periplasmic sugar-binding proteins : putative sugar ABC transporter, solute-binding protein                                   |
| 163416343              | 0.00204 | COG3181 |        | Csal_1767   | uncharacterized BCR                                                                                                           |
| 163441934              | 0.00198 | COG2885 | K03640 | SAR11_0598  | outer membrane protein and related peptidoglycan-associated (lipo)proteins : ompA; OmpA family                                |

|                         |         |         |        |               |                                                                                                                                                              |
|-------------------------|---------|---------|--------|---------------|--------------------------------------------------------------------------------------------------------------------------------------------------------------|
| 163320067               | 0.00176 | COG2165 | K02650 | SAR11_0054    | general secretory pathway proteins G and H and related periplasmic/secreted proteins : pilA; pilin (bacterial filament)                                      |
| 163274197 <sub>b</sub>  | 0.00167 | COG0715 | K02051 | SAR11_0807    | ABC-type nitrate/sulfonate/taurine/bicarbonate transport systems, periplasmic components                                                                     |
| 163128105               | 0.00167 | COG1012 | K00128 | AAur_pTC20196 | NAD-dependent aldehyde dehydrogenases                                                                                                                        |
| 163214443 <sub>e</sub>  | 0.00161 | COG0834 | K09969 | HCH_05807     | ABC-type amino acid transport system, periplasmic component                                                                                                  |
| 163174178               | 0.00143 | COG1879 |        | RHA1_ro08504  | periplasmic sugar-binding proteins : ABC sugar transporter, periplasmic substrate binding protein                                                            |
| 163134937 <sub>d</sub>  | 0.00138 | COG0591 |        | SAR11_0316    | Na <sup>+</sup> /proline, Na <sup>+</sup> /panthothenate symporters and related permeases : yjcG                                                             |
| 163451228               | 0.00132 | COG2113 | K02002 | SAR11_0797    | ABC-type proline/glycine betaine transport systems, periplasmic components : proX                                                                            |
| 163376697*              | 0.00129 | COG0834 | K10018 | SAR11_1210    | ABC-type amino acid transport system, periplasmic component : octopine/nopaline transport system substrate-binding protein                                   |
| 163104625               | 0.00119 | COG0683 | K01999 | AAur_1271     | ABC-type branched-chain amino acid transport systems, periplasmic component : braC;                                                                          |
| 163498557               | 0.00116 | COG3181 | K07795 | Mmwyl1_1799   | uncharacterized BCR : putative tricarboxylic transport membrane protein                                                                                      |
| 163497259               | 0.00107 | COG0747 |        | CMM_2185      | ABC-type dipeptide/oligopeptide/nickel transport systems, periplasmic components                                                                             |
| 163296806               | 0.00075 | COG0834 | K02030 | SAR11_1068    | ABC-type amino acid transport system, periplasmic componentp: pheC; cyclohexadienyl dehydratase; polar amino acid transport system substrate-binding protein |
| 163277703               | 0.00071 | COG0055 | K02112 | AceI_0653     | F0F1-type ATP synthase beta subunit                                                                                                                          |
| 163152101* <sub>f</sub> | 0.00066 | COG0459 | K04077 | SAR11_0162    | chaperonin GroEL (HSP60 family)                                                                                                                              |
| 163296936 <sub>a</sub>  | 0.00055 | COG0050 | K02358 | SAR11_1130    | GTPases - translation elongation factors : tufB                                                                                                              |

| 163117667                                    | 0.00043                              | COG0174              | K01915               | SAR11_0747                 | glutamine synthase : glnA                                                                                                  |
|----------------------------------------------|--------------------------------------|----------------------|----------------------|----------------------------|----------------------------------------------------------------------------------------------------------------------------|
| 163154554 <sub>a</sub>                       | 0.00042                              | COG0050              | K02358               | Tfu_2648                   | GTPases - translation elongation factors : tuf                                                                             |
| 163450946                                    | 0.00036                              | COG0683              | K01999               | SAR11_1346                 | ABC-type branched-chain amino acid transport systems, periplasmic component : livJ;                                        |
| 163208382                                    | 0.00035                              | COG0174              | K01915               | CMM_1636                   | glutamine synthase : glnA                                                                                                  |
| 163135037                                    | 0.00031                              | COG2133              | K00540               | Rsph17025_1771             | glucose/sorbose dehydrogenases                                                                                             |
| 163150509                                    | 0.00028                              | COG0737              |                      | Haur_2906                  | 5'-nucleotidase/2',3'-cyclic phosphodiesterase and related esterases                                                       |
| 163195194                                    | 0.00028                              | COG0086              | K03046               | Lxx20630                   | DNA-directed RNA polymerase beta' subunit/160 kD subunit (split gene in archaea and Syn) : rpoC                            |
| 163169240*                                   | 0.00027                              | COG0330              | K04088               | SAR11_0008                 | membrane protease subunits, stomatin/prohibitin homologs : hflK                                                            |
| 163135897                                    | 0.00014                              | COG1185              | K00962               | SAR11_0392                 | polyribonucleotide nucleotidyltransferase (polynucleotide phosphorylase) : pnp; polynucleotide phosphorylase/polyadenylase |
| <b>11.5 m KEGG and NR annotated proteins</b> |                                      |                      |                      |                            |                                                                                                                            |
| <b>Gene ID</b>                               | <b>normalised spectral abundance</b> | <b>NR identifier</b> | <b>KO identifier</b> | <b>KEGG / NR locus tag</b> | <b>KEGG / NR description</b>                                                                                               |
| 163498919 <sub>g</sub>                       | 0.04693                              | BAF91544             |                      |                            | major capsid protein [uncultured Myoviridae]                                                                               |
| 163303017 <sub>h</sub>                       | 0.03153                              |                      |                      | GDI3673                    | hypothetical protein                                                                                                       |
| 163496543 <sub>i</sub>                       | 0.03095                              | YP_001648158         |                      |                            | hypothetical protein [Ostreococcus virus OsV5]                                                                             |
| 163312513                                    | 0.02334                              | YP_002590925         |                      |                            | putative porin [Candidatus Pelagibacter sp. HTCC7211]                                                                      |
| 163114028 <sub>g</sub>                       | 0.02078                              | YP_214669            |                      |                            | gp23 [Prochlorococcus phage P-SSM4]                                                                                        |
| 163447324 <sub>i</sub>                       | 0.01947                              | YP_001648266         |                      |                            | hypothetical protein OsV5_190f [Ostreococcus virus OsV5]                                                                   |
| 163104039 <sub>j</sub>                       | 0.01469                              | YP_001498525         |                      | AR158_C444L                | hypothetical protein [Paramecium bursaria Chlorella virus AR158]                                                           |
| 163299338                                    | 0.01058                              |                      |                      | Sputw3181_2479             | phage major capsid protein, HK97 family                                                                                    |

|                         |         |              |  |                  |                                                                |
|-------------------------|---------|--------------|--|------------------|----------------------------------------------------------------|
| 163431599 <sub>i</sub>  | 0.01022 | YP_001648266 |  | OsV5_190f        | hypothetical protein [Ostreococcus virus OsV5]                 |
| 163486997 <sub>k</sub>  | 0.00971 |              |  | SG1188           | hypothetical protein                                           |
| 163200650               | 0.00948 |              |  | mlr8524          | phage major capsid protein, GP36                               |
| 163146271* <sub>i</sub> | 0.00930 |              |  | BBta_5785        | putative phage major head protein                              |
| 163466160               | 0.00921 |              |  | BBta_5785        | putative phage major head protein                              |
| 163111996 <sub>h</sub>  | 0.00849 |              |  | GDI3673          | hypothetical protein                                           |
| 163277976               | 0.00767 |              |  | Neut_1469        | phage major capsid protein, HK97 family protein                |
| 163276037               | 0.00762 |              |  | mma_2202         | hypothetical protein                                           |
| 163114610 <sub>i</sub>  | 0.00717 | A7U6E7       |  |                  | putative major capsid protein [Chrysochromulina ericina virus] |
| 163191828               | 0.00696 | ZP_03701413  |  | Flav3CDRAFT_1333 | hypothetical protein [Flavobacteria bacterium MS024-3C]        |
| 163121725*              | 0.00678 | YP_001648124 |  | OsV5_047f        | hypothetical protein [Ostreococcus virus OsV5]                 |
| 163383538*              | 0.00611 |              |  | Neut_1469        | phage major capsid protein, HK97 family protein                |
| 163125121 <sub>g</sub>  | 0.00600 | YP_214669    |  |                  | gp23 [Prochlorococcus phage P-SSM4]                            |
| 163161438               | 0.00539 | ABW90951     |  |                  | gp23 major capsid protein [uncultured Myoviridae]              |
| 163404994 <sub>m</sub>  | 0.00493 |              |  | Haur_0657        | hypothetical protein                                           |
| 163115173* <sub>n</sub> | 0.00467 | YP_001648182 |  | OsV5_105r        | hypothetical protein [Ostreococcus virus OsV5]                 |
| 163253040               | 0.00435 |              |  | Bpro_3745        | hypothetical protein                                           |
| 163519031               | 0.00433 | YP_002276820 |  | Gdia_2460        | hypothetical protein [Gluconacetobacter diazotrophicus PAI 5]  |
| 163228214 <sub>o</sub>  | 0.00413 |              |  | Daci_1946        | putative phage major head protein                              |
| 163291274 <sub>h</sub>  | 0.00407 |              |  | GDI3673          | hypothetical protein                                           |
| 163206524* <sub>i</sub> | 0.00403 | YP_001648266 |  | OsV5_190f        | hypothetical protein [Ostreococcus virus OsV5]                 |
| 163514201               | 0.00400 |              |  | MAB_1788         | bacteriophage protein                                          |
| 163498539               | 0.00399 |              |  | SAR11_1290       | TRAP-type bacterial extracellular solute-binding protein       |
| 163432666               | 0.00396 |              |  | Oter_3421        | hypothetical protein                                           |
| 163480087               | 0.00392 |              |  | APECO1_525       | hypothetical protein                                           |
| 163187860               | 0.00390 |              |  | GDI3673          | hypothetical protein                                           |

|                        |         |              |  |                |                                                                   |
|------------------------|---------|--------------|--|----------------|-------------------------------------------------------------------|
| 163529078              | 0.00375 |              |  | HM1_2880       | phage major capsid protein, hk97 family                           |
| 163526011 <sub>i</sub> | 0.00371 | A7U6E9       |  |                | putative major capsid protein [Pyramimonas orientalis virus]      |
| 163180584              | 0.00369 | BAE06835     |  |                | hypothetical major capsid protein [Heterosigma akashiwo virus 01] |
| 163459594 <sub>i</sub> | 0.00364 | BAE06835     |  |                | hypothetical major capsid protein [Heterosigma akashiwo virus 01] |
| 163503842 <sub>h</sub> | 0.00357 |              |  | GDI3673        | hypothetical protein                                              |
| 163495193              | 0.00351 |              |  | MAB_1788       | bacteriophage protein                                             |
| 163385358 <sub>p</sub> | 0.00324 |              |  | GDI3673        | hypothetical protein                                              |
| 163489449              | 0.00313 |              |  | SG1188         | hypothetical protein                                              |
| 163472957              | 0.00310 |              |  | Asuc_1240      | phage major capsid protein, HK97 family                           |
| 163131623              | 0.00298 | YP_195142    |  |                | major capsid protein gp23 [Synechococcus phage S-PM2]             |
| 163118697 <sub>i</sub> | 0.00289 | A7U6F0       |  |                | putative major capsid protein [Phaeocystis pouchetii virus]       |
| 163420549              | 0.00284 |              |  | LGAS_1485      | predicted phage phi-C31 GP36 major capsid-like protein            |
| 163142179              | 0.00279 | ZP_03643684  |  | BACCOPRO_02057 | hypothetical protein [Bacteroides coprophilus DSM 18228]          |
| 163250350 <sub>q</sub> | 0.00277 | YP_214367    |  |                | T4-like major capsid protein [Prochlorococcus phage P-SSM2]       |
| 163541257              | 0.00271 |              |  | Swit_4452      | hypothetical protein                                              |
| 163478791              | 0.00261 |              |  | amb4267        | hypothetical protein                                              |
| 163452556              | 0.00245 |              |  | APECO1_525     | hypothetical protein                                              |
| 163507581              | 0.00237 |              |  | Cthe_2848      | phage major capsid protein, HK97                                  |
| 163409546*             | 0.00234 | YP_001648301 |  | OsV5_225r      | hypothetical protein [Ostreococcus virus OsV5]                    |
| 163412911              | 0.00233 | ZP_03724502  |  | ObacDRAFT_9001 | hypothetical protein [Opitutaceae bacterium TAV2]                 |
| 163544869              | 0.00230 |              |  | Smed_1334      | phage major capsid protein, HK97 family                           |
| 163323331              | 0.00222 |              |  | LGAS_1485      | predicted phage phi-C31 GP36 major capsid-like                    |

|                         |         |              |  |             |                                                                               |
|-------------------------|---------|--------------|--|-------------|-------------------------------------------------------------------------------|
|                         |         |              |  |             | protein                                                                       |
| 163235228*              | 0.00221 |              |  | BBta_5785   | putative phage major head protein                                             |
| 163494515 <sub>r</sub>  | 0.00217 |              |  | LGAS_1485   | predicted phage phi-C31 GP36 major capsid-like protein                        |
| 163372194               | 0.00216 | ZP_01017474  |  |             | major capsid protein, HK97 family protein [Parvularcula bermudensis HTCC2503] |
| 163252031 <sub>i</sub>  | 0.00210 | A7U6F0       |  |             | putative major capsid protein [Phaeocystis pouchetii virus]                   |
| 163390078 <sub>p</sub>  | 0.00210 |              |  | GDI3673     | hypothetical protein                                                          |
| 163290252 <sub>m</sub>  | 0.00201 |              |  | Haur_0657   | hypothetical protein                                                          |
| 163157042 <sub>k</sub>  | 0.00196 |              |  | SG1188      | hypothetical protein                                                          |
| 163199564 <sub>i</sub>  | 0.00192 | YP_001648266 |  | OsV5_190f   | hypothetical protein [Ostreococcus virus OsV5]                                |
| 163490373 <sub>h</sub>  | 0.00191 |              |  | GDI3673     | hypothetical protein                                                          |
| 163445182               | 0.00189 |              |  | Acid_4111   | hypothetical protein                                                          |
| 163229276 <sub>i</sub>  | 0.00187 | YP_001648266 |  | OsV5_190f   | hypothetical protein [Ostreococcus virus OsV5]                                |
| 163485571 <sub>i</sub>  | 0.00185 | YP_001648158 |  | OsV5_081f   | hypothetical protein [Ostreococcus virus OsV5]                                |
| 163499762               | 0.00183 |              |  | BBta_5785   | putative phage major head protein                                             |
| 163227690 <sub>i</sub>  | 0.00181 | YP_001648158 |  | OsV5_081f   | hypothetical protein [Ostreococcus virus OsV5]                                |
| 163168692               | 0.00179 |              |  | M446_5960   | hypothetical protein                                                          |
| 163109620*              | 0.00175 | YP_001648249 |  | OsV5_172f   | hypothetical protein [Ostreococcus virus OsV5]                                |
| 163105813               | 0.00173 |              |  | APECO1_4044 | hypothetical protein                                                          |
| 163141843* <sub>i</sub> | 0.00172 | YP_001648266 |  | OsV5_190f   | hypothetical protein [Ostreococcus virus OsV5]                                |
| 163117897 <sub>h</sub>  | 0.00163 |              |  | GDI3673     | hypothetical protein                                                          |
| 163173092               | 0.00163 |              |  | Pmen_3970   | phage major capsid protein, HK97 family                                       |
| 163491889               | 0.00161 |              |  | CKO_01864   | hypothetical protein                                                          |
| 163453714 <sub>h</sub>  | 0.00159 |              |  | GDI3673     | hypothetical protein                                                          |
| 163161098 <sub>q</sub>  | 0.00157 | YP_214367    |  |             | T4-like major capsid protein [Prochlorococcus phage P-SSM2]                   |
| 163177212               | 0.00156 |              |  | BBta_6597   | putative peptidase S14, ClpP                                                  |

|                         |         |              |        |            |                                                                                            |
|-------------------------|---------|--------------|--------|------------|--------------------------------------------------------------------------------------------|
| 163352152               | 0.00154 |              |        | BDI_2873   | putative outer membrane protein, probably involved in nutrient binding                     |
| 163372026 <sub>i</sub>  | 0.00151 | YP_001648266 |        | OsV5_190f  | hypothetical protein [Ostreococcus virus OsV5]                                             |
| 163287382 <sub>q</sub>  | 0.00151 | YP_214367    |        |            | T4-like major capsid protein [Prochlorococcus phage P-SSM2]                                |
| 163379834 <sub>h</sub>  | 0.00151 |              |        | GDI3673    | hypothetical protein                                                                       |
| 163124973               | 0.00148 |              |        | BAV1464    | major capsid protein                                                                       |
| 163354170               | 0.00145 | YP_001648190 |        | OsV5_113r  | hypothetical protein [Ostreococcus virus OsV5]                                             |
| 163115568* <sub>s</sub> | 0.00143 | YP_001648153 |        | OsV5_076f  | hypothetical protein [Ostreococcus virus OsV5]                                             |
| 163410122 <sub>s</sub>  | 0.00140 | YP_001648315 |        | OsV5_239r  | hypothetical protein [Ostreococcus virus OsV5]                                             |
| 163411861 <sub>r</sub>  | 0.00138 |              |        | LGAS_1485  | predicted phage phi-C31 GP36 major capsid-like protein                                     |
| 163220019               | 0.00132 | ZP_00743477  |        | RBTH_08297 | hypothetical protein [Bacillus thuringiensis serovar israelensis ATCC 35646]               |
| 163134239*              | 0.00132 | YP_001648234 |        | OsV5_157f  | hypothetical protein [Ostreococcus virus OsV5]                                             |
| 163174626*              | 0.00130 |              | K06904 | BL0376     | hypothetical protein with similarity to putative maturation protease of prophage CP-9 33CE |
| 163154474               | 0.00125 |              |        | gll0198    | similar to bacterioopsin                                                                   |
| 163467688 <sub>i</sub>  | 0.00115 |              |        | Daci_1946  | putative phage major head protein                                                          |
| 163256412               | 0.00111 | ZP_00743477  |        | RBTH_08297 | hypothetical protein [Bacillus thuringiensis serovar israelensis ATCC 35646]               |
| 163389410               | 0.00111 |              |        | Oant_1504  | peptidase U35 phage prohead HK97                                                           |
| 163248889 <sub>i</sub>  | 0.00110 | YP_001648266 |        | OsV5_190f  | hypothetical protein [Ostreococcus virus OsV5]                                             |
| 163415470 <sub>i</sub>  | 0.00104 | A7U6F0       |        |            | putative major capsid protein [Phaeocystis pouchetii virus]                                |
| 163191410*              | 0.00100 | YP_001648184 |        | OsV5_107r  | hypothetical protein [Ostreococcus virus OsV5]                                             |
| 163142589               | 0.00093 |              |        | Pmen_3970  | phage major capsid protein, HK97 family                                                    |
| 163327003 <sub>t</sub>  | 0.00088 |              | K06907 | Dde_1889   | hypothetical protein; K06907                                                               |
| 163211634* <sub>i</sub> | 0.00086 | YP_001648266 |        | OsV5_190f  | hypothetical protein [Ostreococcus virus OsV5]                                             |
| 163393172 <sub>i</sub>  | 0.00075 | YP_001648266 |        | OsV5_190f  | hypothetical protein [Ostreococcus virus OsV5]                                             |

|                                             |         |              |        |                   |                                                                  |
|---------------------------------------------|---------|--------------|--------|-------------------|------------------------------------------------------------------|
| 163161074 <sub>t</sub>                      | 0.00073 |              | K06907 | Dde_1889          | hypothetical protein; K06907                                     |
| 163141653* <sub>i</sub>                     | 0.00070 | YP_001648158 |        | OsV5_081f         | hypothetical protein [Ostreococcus virus OsV5]                   |
| 163110018                                   | 0.00068 | YP_001294637 |        | ORF044            | hypothetical protein [Pseudomonas phage PA11]                    |
| 163249021 <sub>s</sub>                      | 0.00067 | YP_001648315 |        | OsV5_239r         | hypothetical protein [Ostreococcus virus OsV5]                   |
| 163445294* <sub>j</sub>                     | 0.00062 | YP_001498525 |        | AR158_C444L       | hypothetical protein [Paramecium bursaria Chlorella virus AR158] |
| 163507277                                   | 0.00058 |              |        | CHLREDRAFT_186229 | hypothetical protein                                             |
| 163298764 <sub>i</sub>                      | 0.00058 | YP_001648158 |        | OsV5_081f         | hypothetical protein [Ostreococcus virus OsV5]                   |
| 163298596 <sub>i</sub>                      | 0.00055 | YP_001648266 |        | OsV5_190f         | hypothetical protein [Ostreococcus virus OsV5]                   |
| 163335150                                   | 0.00053 |              |        | BAV1464           | major capsid protein                                             |
| 163327023* <sub>q</sub>                     | 0.00046 | YP_214367    |        |                   | T4-like major capsid protein [Prochlorococcus phage P-SSM2]      |
| 163287366 <sub>t</sub>                      | 0.00038 |              | K06907 | Sfum_3815         | phage tail sheath protein; K06907                                |
| 163475851 <sub>o</sub>                      | 0.00028 |              |        | ZMO0387           | major head protein                                               |
| 163195236* <sub>s</sub>                     | 0.00027 | YP_001648315 |        | OsV5_239r         | hypothetical protein [Ostreococcus virus OsV5]                   |
| 163184761                                   | 0.00027 | YP_001648134 |        | OsV5_057f         | hypothetical protein [Ostreococcus virus OsV5]                   |
| 163109424* <sub>n</sub>                     | 0.00023 | YP_001648182 |        | OsV5_105r         | hypothetical protein [Ostreococcus virus OsV5]                   |
| 163368976                                   | 0.00020 | YP_001648211 |        | OsV5_134r         | hypothetical protein [Ostreococcus virus OsV5]                   |
| 163306940                                   | 0.00018 | YP_001648185 |        | OsV5_108r         | hypothetical protein [Ostreococcus virus OsV5]                   |
| 163162936*                                  | 0.00017 | YP_001648263 |        | OsV5_187r         | hypothetical protein [Ostreococcus virus OsV5]                   |
| 163151745 <sub>s</sub>                      | 0.00017 | YP_001648315 |        | OsV5_239r         | hypothetical protein [Ostreococcus virus OsV5]                   |
| <b>11.5 m - Proteins with no annotation</b> |         |              |        |                   |                                                                  |
| 163171140                                   | 0.03385 |              |        |                   |                                                                  |
| 163345623 <sub>u</sub>                      | 0.03193 |              |        |                   |                                                                  |
| 163279609                                   | 0.01466 |              |        |                   |                                                                  |
| 163534693                                   | 0.00797 |              |        |                   |                                                                  |
| 163109584                                   | 0.00788 |              |        |                   |                                                                  |
| 163251027                                   | 0.00668 |              |        |                   |                                                                  |
| 163250059 <sub>u</sub>                      | 0.00668 |              |        |                   |                                                                  |



|                        |         |  |  |  |  |
|------------------------|---------|--|--|--|--|
| 163386750 <sub>u</sub> | 0.00650 |  |  |  |  |
| 163254426              | 0.00638 |  |  |  |  |
| 163129699              | 0.00610 |  |  |  |  |
| 163113296*             | 0.00528 |  |  |  |  |
| 163129983              | 0.00511 |  |  |  |  |
| 163395912              | 0.00471 |  |  |  |  |
| 163346783              | 0.00446 |  |  |  |  |
| 163246177 <sub>u</sub> | 0.00435 |  |  |  |  |
| 163303354              | 0.00395 |  |  |  |  |
| 163477113              | 0.00385 |  |  |  |  |
| 163419181              | 0.00349 |  |  |  |  |
| 163431790 <sub>v</sub> | 0.00331 |  |  |  |  |
| 163502200              | 0.00289 |  |  |  |  |
| 163456165              | 0.00285 |  |  |  |  |
| 163397872              | 0.00285 |  |  |  |  |
| 163490375              | 0.00278 |  |  |  |  |
| 163502202              | 0.00250 |  |  |  |  |
| 163453476*             | 0.00247 |  |  |  |  |
| 163503840              | 0.00234 |  |  |  |  |
| 163187858              | 0.00225 |  |  |  |  |
| 163224309 <sub>v</sub> | 0.00211 |  |  |  |  |
| 163117895              | 0.00204 |  |  |  |  |
| 163285151 <sub>w</sub> | 0.00191 |  |  |  |  |
| 163511023 <sub>u</sub> | 0.00182 |  |  |  |  |
| 163156214              | 0.00160 |  |  |  |  |
| 163311655              | 0.00157 |  |  |  |  |
| 163286408 <sub>w</sub> | 0.00138 |  |  |  |  |
| 163254680              | 0.00138 |  |  |  |  |
| 163439545*             | 0.00133 |  |  |  |  |

|                        |         |  |  |  |  |
|------------------------|---------|--|--|--|--|
| 163123675              | 0.00131 |  |  |  |  |
| 163199154 <sub>u</sub> | 0.00126 |  |  |  |  |
| 163129981              | 0.00097 |  |  |  |  |
| 163110772*             | 0.00096 |  |  |  |  |
| 163211312              | 0.00094 |  |  |  |  |
| 163207714              | 0.00092 |  |  |  |  |
| 163342613              | 0.00074 |  |  |  |  |
| 163217867*             | 0.00071 |  |  |  |  |
| 163110016              | 0.00069 |  |  |  |  |
| 163117805              | 0.00063 |  |  |  |  |
| 163280533              | 0.00059 |  |  |  |  |
| 163168938              | 0.00059 |  |  |  |  |
| 163320197              | 0.00040 |  |  |  |  |

| <i>12.7 m - COG annotated proteins</i> |                                      |                       |                      |                       |                                                                                                     |
|----------------------------------------|--------------------------------------|-----------------------|----------------------|-----------------------|-----------------------------------------------------------------------------------------------------|
| <b>Gene ID</b>                         | <b>normalised spectral abundance</b> | <b>COG identifier</b> | <b>KO identifier</b> | <b>KEGG locus tag</b> | <b>COG description : KEGG description</b>                                                           |
| 165547755*                             | 0.01035                              | COG0539               | K02945               | Cvib_1514             | rpsA; 30S ribosomal protein S1                                                                      |
| 165526280                              | 0.00768                              | COG0181               | K01749               | Cvib_1245             | porphobilinogen deaminase : hydroxymethylbilane synthase                                            |
| 165511899                              | 0.00756                              | COG0516               | K00088               | Cvib_1056             | IMP dehydrogenase/GMP reductase                                                                     |
| 165562959                              | 0.00530                              | COG1104               | K04487               | Cvib_0301             | cysteine sulfinase desulfurase/cysteine desulfurase and related enzymes : aminotransferase, class V |
| 165514395*                             | 0.00452                              | COG0674               | K00174               | Cvib_1597             | pyruvate:ferredoxin oxidoreductase and related 2-oxoacid:ferredoxin oxidoreductases, alpha subunit  |
| 165502373                              | 0.00380                              | COG0129               | K01687               | Cvib_1169             | dihydroxy-acid dehydratase                                                                          |
| 165514465*                             | 0.00340                              | COG0054               | K00794               | Cvib_1632             | riboflavin synthase beta-chain                                                                      |
| 165525758                              | 0.00270                              | COG1862               | K03210               | Cvib_0223             | preprotein translocase subunit YajC                                                                 |
| 165514421*                             | 0.00243                              | COG0250               | K02601               | Cvib_1610             | transcription antitermination protein NusG                                                          |

|                         |         |         |        |           |                                                                                                                                                             |
|-------------------------|---------|---------|--------|-----------|-------------------------------------------------------------------------------------------------------------------------------------------------------------|
| 165526166               | 0.00209 | COG0413 | K00606 | Cvib_0725 | ketopantoate hydroxymethyltransferase : panB; 3-methyl-2-oxobutanoate hydroxymethyltransferase                                                              |
| 165562961               | 0.00203 | COG0031 | K01738 | Cvib_0300 | cysteine synthase                                                                                                                                           |
| 165526282               | 0.00189 | COG1587 | K01719 | Cvib_1246 | uroporphyrinogen-III synthase                                                                                                                               |
| 165514409*              | 0.00173 | COG0086 | K03046 | Cvib_1604 | DNA-directed RNA polymerase beta' subunit/160 kD subunit (split gene in archaea and Syn)                                                                    |
| 165514577*              | 0.00162 | COG1778 | K03270 | Cvib_1694 | uncharacterized proteins of HAD superfamily, CMP-Neu5Ac homologs : 3-deoxy-D-manno-octulosonate 8-phosphate phosphatase, Yrbl family; (KDO 8-P phosphatase) |
| 165514581* <sub>a</sub> | 0.00158 | COG0542 |        | Cvib_1696 | ATPases with chaperone activity, ATP-binding subunit : AAA-2 domain protein                                                                                 |
| 165536856               | 0.00155 | COG0157 | K00767 | Cvib_0335 | nicotinate-nucleotide pyrophosphorylase [carboxylating]                                                                                                     |
| 165547841               | 0.00146 | COG0493 | K00266 | Cvib_1478 | NADPH-dependent glutamate synthase beta chain and related oxidoreductases                                                                                   |
| 165514651*              | 0.00139 | COG0797 | K03642 | Cvib_1727 | lipoproteins : rare lipoprotein A                                                                                                                           |
| 165525906               | 0.00137 | COG0750 | K01417 | Cvib_0137 | predicted membrane-associated Zn-dependent proteases 1                                                                                                      |
| 165501975*              | 0.00135 | COG0740 | K01358 | Cvib_0441 | protease subunit of ATP-dependent Clp proteases                                                                                                             |
| 165505943               | 0.00135 | COG0543 |        | Cvib_0839 | 2-polyprenylphenol hydroxylase and related flavodoxin oxidoreductases : oxidoreductase FAD/NAD(P)-binding domain protein                                    |
| 165526296               | 0.00133 | COG0082 | K01736 | Cvib_1253 | chorismate synthase                                                                                                                                         |
| 165547993               | 0.00132 | COG0497 | K03631 | Cvib_1402 | ATPases involved in DNA repair : DNA repair protein RecN                                                                                                    |
| 165547777               | 0.00126 | COG0008 | K01885 | Cvib_1503 | glutamyl-tRNA synthetase                                                                                                                                    |
| 165553075               | 0.00125 | COG1158 | K03628 | Cvib_1537 | transcription termination factor : Rho                                                                                                                      |
| 165511737               | 0.00121 | COG1726 | K03615 | Cvib_0797 | Na <sup>+</sup> -transporting NADH:ubiquinone oxidoreductase alpha subunit : electron transport complex, RnfABCDGE type, C subunit                          |

|            |         |         |        |           |                                                                                                                 |
|------------|---------|---------|--------|-----------|-----------------------------------------------------------------------------------------------------------------|
| 165526284  | 0.00118 | COG0483 | K01092 | Cvib_1247 | archaeal fructose-1,6-bisphosphatase and related enzymes of inositol monophosphatase family                     |
| 165525808  | 0.00116 | COG0331 | K00645 | Cvib_0199 | (acyl-carrier-protein) S-malonyltransferase                                                                     |
| 165550953  | 0.00116 | COG1022 | K01897 | Cvib_0930 | long-chain acyl-CoA synthetases (AMP-forming) : AMP-dependent synthetase and ligase                             |
| 165502369  | 0.00105 | COG0440 | K01653 | Cvib_1171 | acetolactate synthase, small subunit                                                                            |
| 165526250  | 0.00104 | COG1522 |        | Cvib_1231 | transcriptional regulators : AsnC family                                                                        |
| 165525708  | 0.00102 | COG0089 | K02892 | Cvib_0248 | rplW; 50S ribosomal protein L23                                                                                 |
| 165502825* | 0.00102 | COG0341 | K03074 | Cvib_0011 | secF; preprotein translocase subunit SecF                                                                       |
| 165502225  | 0.00101 | COG0557 | K01147 | Cvib_0574 | Exoribonucleases : RNase R; exoribonuclease II                                                                  |
| 165514389* | 0.00101 | COG0446 |        | Cvib_1594 | uncharacterized NAD(FAD)-dependent dehydrogenases : FAD-dependent pyridine nucleotide-disulphide oxidoreductase |
| 165525802  | 0.00100 | COG0333 | K02911 | Cvib_0202 | rpmF; 50S ribosomal protein L32                                                                                 |
| 165525664  | 0.00098 | COG0100 | K02948 | Cvib_0271 | 30S ribosomal protein S11                                                                                       |
| 165511903  | 0.00095 | COG1240 | K03404 | Cvib_1058 | Mg-chelatase subunit ChII : protoporphyrin IX magnesium-chelatase                                               |
| 165514579* | 0.00094 | COG2877 | K01627 | Cvib_1695 | 3-Deoxy-D-manno-octulosonic acid (KDO) 8-phosphate synthase                                                     |
| 165525806  | 0.00094 | COG0332 | K00648 | Cvib_0200 | 3-oxoacyl-(acyl carrier protein) synthase III                                                                   |
| 165519368  | 0.00094 | COG1192 | K03496 | Cvib_0388 | ATPases involved in chromosome partitioning                                                                     |
| 165547931  | 0.00093 | COG0217 |        | Cvib_1432 | uncharacterized ACR : hypothetical protein                                                                      |
| 165536866  | 0.00091 | COG0468 | K03553 | Cvib_0340 | RecA/RadA recombinase                                                                                           |
| 165514413* | 0.00086 | COG0222 | K02935 | Cvib_1606 | rplL; 50S ribosomal protein L7/L12                                                                              |
| 165547847  | 0.00086 | COG0106 | K01814 | Cvib_1475 | phosphoribosylformimino-5-aminoimidazole carboxamide ribotide isomerase                                         |
| 165525912  | 0.00085 | COG0778 |        | Cvib_0134 | nitroreductase                                                                                                  |
| 165547827  | 0.00082 | COG1136 | K02003 | Cvib_1485 | ABC-type transport systems, involved in lipoprotein release, ATPase components                                  |

|                        |         |         |        |            |                                                                                                                           |
|------------------------|---------|---------|--------|------------|---------------------------------------------------------------------------------------------------------------------------|
| 165547771              | 0.00080 | COG0776 | K05788 | Cvib_1506  | bacterial nucleoid DNA-binding protein : histone family protein DNA-binding protein; integration host factor subunit beta |
| 165562901              | 0.00080 | COG0003 | K01551 | Cvib_0328  | predicted ATPase involved in chromosome partitioning : arsenite-activated ATPase ArsA                                     |
| 165530868              | 0.00079 | COG2089 | K01654 | fnu:FN1684 | sialic acid synthase : N-acetylneuraminate synthase                                                                       |
| 165562905              | 0.00078 | COG0629 | K03111 | Cvib_0326  | single-strand DNA-binding protein                                                                                         |
| 165502829*             | 0.00077 | COG0446 | K00540 | Cvib_0009  | uncharacterized NAD(FAD)-dependent dehydrogenases : sulfide dehydrogenase (flavocytochrome), flavoprotein subunit         |
| 165511991              | 0.00076 | COG1418 | K06950 | Cvib_1112  | predicted HD superfamily hydrolase : hypothetical protein                                                                 |
| 165547765              | 0.00075 | COG0503 | K00759 | Cvib_1509  | adenine/guanine phosphoribosyltransferases and related PRPP-binding proteins                                              |
| 165515181              | 0.00075 | COG0711 | K02109 | Cvib_1741  | FOF1-type ATP synthase b subunit                                                                                          |
| 165502313              | 0.00075 | COG0209 | K00525 | Cvib_1199  | ribonucleotide-diphosphate reductase subunit alpha                                                                        |
| 165525750 <sub>a</sub> | 0.00074 | COG0542 |        | Cvib_0227  | ATPases with chaperone activity, ATP-binding subunit : AAA ATPase, central domain protein                                 |
| 165525840              | 0.00074 | COG0360 | K02990 | Cvib_0181  | rpsF; 30S ribosomal protein S6                                                                                            |
| 165547781              | 0.00073 | COG0723 | K02636 | Cvib_1501  | Rieske Fe-S protein : plastoquinol--plastocyanin reductase; cytochrome b6-f complex iron-sulfur subunit                   |
| 165548025              | 0.00073 | COG0058 | K00688 | Cvib_1386  | alpha-glucan phosphorylase                                                                                                |
| 165511773              | 0.00072 | COG0524 |        | Cvib_0779  | sugar kinases, ribokinase family : PfkB domain protein                                                                    |
| 165514433*             | 0.00071 | COG0480 | K02355 | Cvib_1616  | translation elongation and release factors (GTPases) : fusA; elongation factor G                                          |
| 165526086              | 0.00071 | COG2089 | K01654 | Cvib_1025  | sialic acid synthase : N-acetylneuraminate synthase                                                                       |
| 165502143              | 0.00070 | COG3040 | K03098 | Cvib_0516  | bacterial lipocalin                                                                                                       |
| 165547991              | 0.00070 | COG0329 | K01714 | Cvib_1403  | dihydrodipicolinate synthase/N-acetylneuraminate lyase                                                                    |

|            |         |         |        |           |                                                                                                                                                         |
|------------|---------|---------|--------|-----------|---------------------------------------------------------------------------------------------------------------------------------------------------------|
| 165536870  | 0.00069 | COG0136 | K00133 | Cvib_0342 | aspartate semialdehyde dehydrogenase                                                                                                                    |
| 165502129  | 0.00067 | COG0158 | K03841 | Cvib_0509 | fructose-1,6-bisphosphatase                                                                                                                             |
| 165525834  | 0.00067 | COG0359 | K02939 | Cvib_0184 | rplI; 50S ribosomal protein L9                                                                                                                          |
| 165547783  | 0.00065 | COG1290 | K00412 | Cvib_1500 | cytochrome b subunit of the bc complex :<br>cytochrome b/b6, N-terminal domain protein;<br>ubiquinol-cytochrome c reductase                             |
| 165553031  | 0.00065 | COG0184 | K02956 | Cvib_1557 | rpsO; 30S ribosomal protein S15                                                                                                                         |
| 165502097  | 0.00065 | COG0127 | K01516 | Cvib_0493 | non-canonical purine NTP pyrophosphatase,<br>RdgB/HAM1 family                                                                                           |
| 165514535* | 0.00064 | COG0366 |        | Cvib_1672 | glycosidases : trehalose synthase                                                                                                                       |
| 165536860  | 0.00064 | COG0544 | K03545 | Cvib_0337 | FKBP-type peptidyl-prolyl cis-trans isomerase (trigger<br>factor)                                                                                       |
| 165519356  | 0.00060 | COG1410 | K00548 | Cvib_0382 | methionine synthase I, cobalamin-binding domain :<br>methH; 5-methyltetrahydrofolate--homocysteine<br>methyltransferase                                 |
| 165525900  | 0.00058 | COG0284 | K01591 | Cvib_0140 | orotidine 5'-phosphate decarboxylase                                                                                                                    |
| 165547983  | 0.00057 | COG0674 | K03737 | Cvib_1407 | pyruvate:ferredoxin oxidoreductase and related 2-<br>oxoacid:ferredoxin oxidoreductases, alpha subunit                                                  |
| 165547901  | 0.00057 | COG3155 |        | Cvib_1447 | uncharacterized sigma cross-reacting protein 27A<br>(ES1 or KNP-I alpha protein) : isoprenoid biosynthesis<br>protein with amidotransferase-like domain |
| 165562941  | 0.00057 | COG2319 |        | Cvib_0309 | WD-40 repeat protein                                                                                                                                    |
| 165526078  | 0.00056 | COG0589 |        | Cvib_1021 | universal stress protein UspA and related nucleotide-<br>binding proteins                                                                               |
| 165516491  | 0.00056 | COG0760 |        | Cvib_1572 | parvulin-like peptidyl-prolyl isomerase : PpiC-type<br>peptidyl-prolyl cis-trans isomerase                                                              |
| 165562981  | 0.00053 | COG1043 | K00677 | Cvib_0290 | acyl-[acyl carrier protein]--UDP-N-acetylglucosamine<br>O-acyltransferase                                                                               |
| 165502845* | 0.00052 | COG0706 | K03217 | Cvib_1771 | preprotein translocase subunit YidC                                                                                                                     |

|            |         |         |        |           |                                                                                                                       |
|------------|---------|---------|--------|-----------|-----------------------------------------------------------------------------------------------------------------------|
| 165525718  | 0.00051 | COG0480 | K02355 | Cvib_0243 | translation elongation and release factors (GTPases) : fusA; elongation factor G                                      |
| 165526290  | 0.00051 | COG0511 |        | Cvib_1250 | biotin carboxyl carrier protein : biotin/lipoyl attachment domain-containing protein                                  |
| 165557791  | 0.00051 | COG0074 |        | Cvib_0866 | succinyl-CoA synthetase alpha subunit : ATP citrate lyase subunit 2                                                   |
| 165547973  | 0.00050 | COG1493 | K06023 | Cvib_1412 | serine kinase of the HPr protein, regulates carbohydrate metabolism                                                   |
| 165502247  | 0.00050 | COG0234 | K04078 | Plut_0541 | groES; co-chaperonin GroES                                                                                            |
| 165514671* | 0.00050 | COG0636 | K02110 | Plut_2097 | F0F1-type ATP synthase c subunit/Archaeal/vacuolar-type H <sup>+</sup> -ATPase subunit K : ATP synthase F0, C subunit |
| 165502267  | 0.00050 | COG1077 | K03569 | Cvib_0595 | HSP70 class molecular chaperones involved in cell morphogenesis : cell shape determining protein, MreB/Mrl family     |
| 165525868  | 0.00049 | COG0188 | K02469 | Cvib_0172 | DNA gyrase subunit A                                                                                                  |
| 165514647* | 0.00048 | COG0167 | K00226 | Cvib_1724 | dihydroorotate dehydrogenase 2                                                                                        |
| 165509259* | 0.00046 | COG0793 | K03797 | Cvib_0018 | periplasmic protease : carboxyl-terminal protease                                                                     |
| 165548143  | 0.00046 | COG0261 | K02888 | Cvib_1329 | rplU; 50S ribosomal protein L21                                                                                       |
| 165514553* | 0.00045 | COG0001 | K01845 | Cvib_1681 | glutamate-1-semialdehyde 2,1-aminomutase                                                                              |
| 165525814  | 0.00044 | COG0304 | K09458 | Cvib_0196 | 3-oxoacyl-[acyl-carrier-protein] synthase II                                                                          |
| 165547833  | 0.00043 | COG2226 | K03183 | Cvib_1482 | methylase involved in ubiquinone/menaquinone biosynthesis : demethylmenaquinone methyltransferase                     |
| 165547919  | 0.00042 | COG0036 | K01783 | Cvib_1438 | ribulose-5-phosphate 3-epimerase                                                                                      |
| 165525676  | 0.00042 | COG1841 | K02907 | Cvib_0264 | rpmD; 50S ribosomal protein L30                                                                                       |
| 165502421  | 0.00042 | COG0443 | K04043 | Cvib_1158 | chaperone protein DnaK                                                                                                |
| 165525692  | 0.00042 | COG0093 | K02874 | Cvib_0256 | rplN; 50S ribosomal protein L14                                                                                       |
| 165525970  | 0.00042 | COG1220 | K03667 | Cvib_0959 | ATP-dependent protease, ATPase subunit : hslU                                                                         |
| 165525828  | 0.00041 | COG0292 | K02887 | Cvib_0187 | rplT; 50S ribosomal protein L20                                                                                       |

|            |         |         |        |           |                                                                                                                                                 |
|------------|---------|---------|--------|-----------|-------------------------------------------------------------------------------------------------------------------------------------------------|
| 165502239  | 0.00040 | COG0596 |        | Cvib_0581 | predicted hydrolases or acyltransferases (alpha/beta hydrolase superfamily)                                                                     |
| 165525710  | 0.00039 | COG0088 | K02926 | Cvib_0247 | rplD; 50S ribosomal protein L4                                                                                                                  |
| 165502125  | 0.00039 | COG2838 | K00031 | Cvib_0507 | monomeric isocitrate dehydrogenase                                                                                                              |
| 165526072  | 0.00039 | COG1038 | K01571 | Cvib_1018 | pyruvate carboxylase, C-terminal domain/subunit : biotin/lipoyl attachment domain-containing protein; oxaloacetate decarboxylase, alpha subunit |
| 165562947  | 0.00038 | COG0040 | K00765 | Cvib_0307 | hisG; ATP phosphoribosyltransferase                                                                                                             |
| 165519380  | 0.00038 | COG0447 | K01661 | Cvib_0394 | dihydroxynaphthoic acid synthase                                                                                                                |
| 165514407* | 0.00038 | COG0439 | K01961 | Cvib_1603 | acetyl-CoA carboxylase, biotin carboxylase                                                                                                      |
| 165547843  | 0.00038 | COG0543 | K00528 | Cvib_1477 | 2-polyprenylphenol hydroxylase and related flavodoxin oxidoreductases : ferredoxin--NADP(+) reductase subunit alpha                             |
| 165502249  | 0.00038 | COG0459 | K04077 | Cvib_0586 | chaperonin GroEL (HSP60 family)                                                                                                                 |
| 165525978  | 0.00038 | COG0190 | K00288 | Cvib_0963 | methenyltetrahydrofolate cyclohydrolase (NADP+)                                                                                                 |
| 165548015  | 0.00037 | COG0115 | K00826 | Cvib_1391 | 4-amino-4-deoxychorismate lyase : branched-chain amino acid aminotransferase                                                                    |
| 165526070  | 0.00037 | COG1883 | K01572 | Cvib_1017 | Na+-transporting methylmalonyl-CoA/oxaloacetate decarboxylase, beta subunit                                                                     |
| 165502323  | 0.00037 | COG2406 | K03594 | Cvib_1194 | uncharacterized ACR : ferritin, Dps family protein                                                                                              |
| 165502157  | 0.00036 | COG0182 | K08963 | Cvib_0532 | translation initiation factor 2B subunit I family (IF-2BI); methylthioribose-1-phosphate isomerase                                              |
| 165502159  | 0.00036 | COG0005 | K03783 | Cvib_0533 | purine nucleoside phosphorylase                                                                                                                 |
| 165526084  | 0.00035 | COG0326 | K04079 | Cvib_1024 | heat shock protein 90; molecular chaperone HtpG                                                                                                 |
| 165547741* | 0.00034 | COG1109 | K01840 | Cvib_1521 | phosphoglucomutase                                                                                                                              |
| 165547943  | 0.00033 | COG0365 | K01895 | Cvib_1426 | acyl-coenzyme A synthetases/AMP-(fatty) acid ligases : acetyl-coenzyme A synthetase                                                             |
| 165547811  | 0.00033 | COG1118 | K02017 | Cvib_1494 | ABC-type sulfate/molybdate transport systems, ATPase component                                                                                  |



|            |         |         |        |           |                                                                                                                             |
|------------|---------|---------|--------|-----------|-----------------------------------------------------------------------------------------------------------------------------|
| 165501997* | 0.00032 | COG0404 | K00605 | Cvib_0451 | glycine cleavage system T protein (aminomethyltransferase)                                                                  |
| 165548139  | 0.00032 | COG0039 | K00026 | Cvib_1331 | malate dehydrogenase                                                                                                        |
| 165547815  | 0.00031 | COG0725 | K02020 | Cvib_1492 | ABC-type molybdate transport system, periplasmic component                                                                  |
| 165526254  | 0.00031 | COG3349 | K00514 | Cvib_1233 | uncharacterized ACR : zeta-carotene desaturase                                                                              |
| 165519338* | 0.00031 | COG1023 | K00033 | Cvib_0374 | 6-phosphogluconate dehydrogenase, family 2                                                                                  |
| 165525774  | 0.00031 | COG0315 | K03637 | Cvib_0215 | moaC; bifunctional molybdenum cofactor biosynthesis protein C/molybdopterin-binding protein                                 |
| 165514597* | 0.00031 | COG0248 |        | Cvib_1704 | Ppx/GppA phosphatase                                                                                                        |
| 165505937  | 0.00030 | COG1908 |        | Cvib_0842 | coenzyme F420-reducing hydrogenase, delta subunit : methyl-viologen-reducing hydrogenase, delta subunit                     |
| 165505095  | 0.00030 | COG1192 |        | Cvib_0908 | ATPases involved in chromosome partitioning : cobyrinic acid a,c-diamide synthase                                           |
| 165547897  | 0.00030 | COG0178 | K03701 | Cvib_1449 | excinuclease ABC subunit A                                                                                                  |
| 165553023  | 0.00030 | COG0532 | K02519 | Cvib_1561 | translation initiation factor 2 (GTPase) : infB                                                                             |
| 165553083  | 0.00029 | COG3637 |        | Cvib_1533 | opacity protein and related surface antigens : porin                                                                        |
| 165562903  | 0.00029 | COG0543 | K02823 | Cvib_0327 | 2-polyprenylphenol hydroxylase and related flavodoxin oxidoreductases : dihydroorotate oxidase B, electron transfer subunit |
| 165547817  | 0.00029 | COG0157 | K03813 | Cvib_1491 | nicotinate-nucleotide pyrophosphorylase : ModD protein; molybdenum transport protein                                        |
| 165511803  | 0.00028 | COG0152 | K01923 | Cvib_0763 | phosphoribosylaminoimidazole-succinocarboxamide synthase                                                                    |
| 165502273  | 0.00028 | COG1049 | K01682 | Cvib_0598 | aconitase B: bifunctional aconitate hydratase 2/2-methylisocitrate dehydratase                                              |
| 165525716  | 0.00028 | COG0050 | K02358 | Cvib_0244 | GTPases - translation elongation factors : tuf                                                                              |
| 165505137* | 0.00027 | COG0724 |        | Cvib_0890 | RNA-binding proteins (RRM domain)                                                                                           |
| 165511799  | 0.00027 | COG0021 | K00615 | Cvib_0765 | transketolase subunit A                                                                                                     |

|                        |         |         |        |           |                                                                                                                                          |
|------------------------|---------|---------|--------|-----------|------------------------------------------------------------------------------------------------------------------------------------------|
| 165502001*             | 0.00027 | COG0694 | K07400 | Cvib_0453 | thioredoxin-like proteins and domains : nitrogen-fixing NifU domain protein                                                              |
| 165525700              | 0.00027 | COG0092 | K02982 | Cvib_0252 | rpsC; 30S ribosomal protein S3                                                                                                           |
| 165548043              | 0.00027 | COG0848 |        | Cvib_1377 | biopolymer transport protein ExbD/TolR                                                                                                   |
| 165502837*             | 0.00027 | COG0426 |        | Cvib_0005 | uncharacterized flavoproteins : beta-lactamase domain protein                                                                            |
| 165502823*             | 0.00027 | COG0760 | K03771 | Cvib_0012 | parvulin-like peptidyl-prolyl isomerase : PpiC-type peptidyl-prolyl cis-trans isomerase                                                  |
| 165525682              | 0.00026 | COG0097 | K02933 | Cvib_0261 | rplF; 50S ribosomal protein L6                                                                                                           |
| 165509275*             | 0.00026 | COG0055 | K02112 | Cvib_0025 | F0F1 ATP synthase subunit beta                                                                                                           |
| 165514365 <sub>a</sub> | 0.00026 | COG0542 | K03696 | Cvib_1580 | ATPases with chaperone activity, ATP-binding subunit : AAA-2 domain protein; ATP-dependent Clp protease                                  |
| 165525766              | 0.00026 | COG3245 |        | Cvib_0219 | cytochrome c5                                                                                                                            |
| 165514371*             | 0.00026 | COG0451 |        | Cvib_1582 | nucleoside-diphosphate-sugar epimerases : NAD-dependent epimerase/dehydratase                                                            |
| 165525810              | 0.00026 | COG1028 | K00059 | Cvib_0198 | dehydrogenases with different specificities (related to short-chain alcohol dehydrogenases) : 3-oxoacyl-[acyl-carrier-protein] reductase |
| 165502383              | 0.00025 | COG0823 | K03641 | Cvib_1164 | periplasmic component of the Tol biopolymer transport system : WD40 domain protein beta propeller; TolB protein                          |
| 165557763              | 0.00025 | COG0137 | K01940 | Cvib_0882 | argininosuccinate synthase                                                                                                               |
| 165502177              | 0.00024 | COG0591 |        | Cvib_0542 | Na <sup>+</sup> /proline, Na <sup>+</sup> /panthothenate symporters and related permeases                                                |
| 165525720              | 0.00024 | COG0049 | K02992 | Cvib_0242 | 30S ribosomal protein S7                                                                                                                 |
| 165553085              | 0.00024 | COG0729 | K07277 | Cvib_1532 | predicted outer membrane protein : surface antigen (D15)                                                                                 |
| 165525770              | 0.00024 | COG0345 | K00286 | Cvib_0217 | pyrroline-5-carboxylate reductase                                                                                                        |
| 165514453*             | 0.00023 | COG0527 | K00928 | Cvib_1626 | aspartokinases                                                                                                                           |
| 165509301*             | 0.00023 | COG2920 | K00396 | Cvib_0038 | sulfite reductase, gamma subunit : DsrC family                                                                                           |

|            |         |         |        |           |                                                                                                                                                  |
|------------|---------|---------|--------|-----------|--------------------------------------------------------------------------------------------------------------------------------------------------|
|            |         |         |        |           | protein                                                                                                                                          |
| 165514489* | 0.00023 | COG1538 |        | Cvib_1644 | outer membrane protein : outer membrane efflux protein                                                                                           |
| 165562971  | 0.00022 | COG0105 | K00940 | Cvib_0295 | nucleoside diphosphate kinase                                                                                                                    |
| 165562957  | 0.00022 | COG0822 | K04488 | Cvib_0302 | NifU homologs involved in Fe-S cluster formation                                                                                                 |
| 165501969* | 0.00022 | COG1752 |        | Cvib_0421 | predicted esterase of the alpha-beta hydrolase superfamily : surface antigen (D15)                                                               |
| 165526170  | 0.00022 | COG1832 | K06929 | Cvib_0723 | predicted CoA-binding protein                                                                                                                    |
| 165514455* | 0.00021 | COG0224 | K02115 | Cvib_1627 | ATP synthase F1, gamma subunit                                                                                                                   |
| 165562919  | 0.00021 | COG1629 | K02014 | Plut_0256 | outer membrane receptor proteins, mostly Fe transport : ferric siderophore receptor, putative, TonB receptor family                              |
| 165550965  | 0.00020 | COG0541 | K03106 | Cvib_0936 | signal recognition particle GTPase : subunit FFH/SRP54 (SRP54)                                                                                   |
| 165502821* | 0.00020 | COG0187 | K02470 | Cvib_0013 | DNA gyrase subunit B                                                                                                                             |
| 165509279* | 0.00020 | COG1274 | K01596 | Cvib_0027 | phosphoenolpyruvate carboxykinase (GTP)                                                                                                          |
| 165514471* | 0.00020 | COG0407 | K01599 | Cvib_1635 | uroporphyrinogen-III decarboxylase                                                                                                               |
| 165505923  | 0.00020 | COG0653 | K03070 | Cvib_0853 | preprotein translocase subunit SecA (ATPase, RNA helicase)                                                                                       |
| 165526076  | 0.00020 | COG1951 | K01676 | Cvib_1020 | tartrate dehydratase alpha subunit/Fumarate hydratase class I, N-terminal domain                                                                 |
| 165547989  | 0.00020 | COG0403 | K00282 | Cvib_1404 | glycine cleavage system protein P (pyridoxal-binding), N-terminal domain : glycine dehydrogenase subunit 1                                       |
| 165550943  | 0.00020 | COG0399 |        | Cvib_0925 | predicted pyridoxal phosphate-dependent enzyme apparently involved in regulation of cell wall biogenesis : DegT/DnrJ/EryC1/StrS aminotransferase |
| 165519308* | 0.00019 | COG1233 |        | Cvib_0356 | phytoene dehydrogenase and related proteins : FAD dependent oxidoreductase                                                                       |
| 165525704  | 0.00019 | COG0185 | K02965 | Cvib_0250 | rpsS; 30S ribosomal protein S19                                                                                                                  |

|            |         |         |        |           |                                                                                                                                                  |
|------------|---------|---------|--------|-----------|--------------------------------------------------------------------------------------------------------------------------------------------------|
| 165502209  | 0.00019 | COG0493 | K00266 | Cvib_0559 | NADPH-dependent glutamate synthase beta chain and related oxidoreductases : gltD                                                                 |
| 165548183  | 0.00019 | COG0057 | K00134 | Cvib_1310 | glyceraldehyde-3-phosphate dehydrogenase                                                                                                         |
| 165509303* | 0.00018 | COG2221 | K00396 | Cvib_0039 | oxidoreductase related to nitrite reductase : sulfite reductase, dissimilatory-type alpha subunit                                                |
| 165502855* | 0.00018 | COG0126 | K00927 | Cvib_1766 | pgk; phosphoglycerate kinase                                                                                                                     |
| 165548189  | 0.00018 | COG0399 |        | Cvib_1298 | predicted pyridoxal phosphate-dependent enzyme apparently involved in regulation of cell wall biogenesis : DegT/DnrJ/EryC1/StrS aminotransferase |
| 165502083  | 0.00018 | COG0723 | K09879 | Cvib_0486 | Rieske Fe-S protein : isorenieratene synthase                                                                                                    |
| 165502241  | 0.00018 | COG1959 |        | Cvib_0582 | predicted transcriptional regulator : transcriptional regulator, BadM/Rrf2 family                                                                |
| 165505101  | 0.00018 | COG1744 | K07335 | Cvib_0906 | surface lipoprotein                                                                                                                              |
| 165562997  | 0.00018 | COG1348 | K04037 | Cvib_0283 | nitrogenase subunit NifH (ATPase) : chlL, bchL; protochlorophyllide reductase iron-sulfur ATP-binding protein                                    |
| 165514479* | 0.00017 | COG0517 |        | Plut_1996 | CBS domains                                                                                                                                      |
| 165509257* | 0.00017 | COG2171 | K00674 | Cvib_0017 | tetrahydrodipicolinate N-succinyltransferase : dapD; 2,3,4,5-tetrahydropyridine-2-carboxylate N-succinyltransferase                              |
| 165525898  | 0.00017 | COG0449 | K00820 | Cvib_0141 | glucosamine 6-phosphate synthetase, contains amidotransferase and phosphosugar isomerase domains : glutamine--fructose-6-phosphate transaminase  |
| 165526040  | 0.00017 | COG0226 | K02040 | Cvib_0998 | phosphate binding protein; phosphate transport system substrate-binding protein                                                                  |
| 165526106  | 0.00017 | COG0718 | K09747 | Cvib_1034 | uncharacterized BCR : conserved hypothetical protein 103                                                                                         |
| 165525660  | 0.00017 | COG0202 | K03040 | Cvib_0273 | DNA-directed RNA polymerase subunit alpha                                                                                                        |
| 165563007  | 0.00017 | COG0218 | K03978 | Cvib_0278 | yihA, ysxC, engB; GTPase EngB                                                                                                                    |

|            |         |         |        |           |                                                                                                                                |
|------------|---------|---------|--------|-----------|--------------------------------------------------------------------------------------------------------------------------------|
| 165526124  | 0.00016 | COG0589 |        | Cvib_1041 | universal stress protein UspA and related nucleotide-binding proteins                                                          |
| 165526138  | 0.00016 | COG1554 |        | Cvib_1047 | trehalose and maltose hydrolases (possible phosphorylases) : beta-phosphoglucomutase family hydrolase                          |
| 165525892  | 0.00016 | COG0724 |        | Cvib_0162 | RNA-binding proteins (RRM domain)                                                                                              |
| 165514417* | 0.00016 | COG0081 | K02863 | Cvib_1608 | rplA; 50S ribosomal protein L1                                                                                                 |
| 165550985  | 0.00016 | COG0260 | K01255 | Cvib_0947 | leucyl aminopeptidase                                                                                                          |
| 165514655* | 0.00016 | COG1899 | K00809 | Cvib_1729 | deoxyhypusine synthase                                                                                                         |
| 165525670  | 0.00016 | COG0024 | K01265 | Cvib_0267 | methionine aminopeptidase : type I                                                                                             |
| 165526140  | 0.00015 | COG0809 | K07568 | Cvib_1048 | S-adenosylmethionine:tRNA-ribosyltransferase-isomerase (queuine synthetase) : queuosine biosynthesis protein                   |
| 165502015  | 0.00015 | COG0264 | K02357 | Cvib_0459 | elongation factor Ts : tsf                                                                                                     |
| 165514419* | 0.00015 | COG0080 | K02867 | Plut_1966 | rplK; 50S ribosomal protein L11                                                                                                |
| 165553033  | 0.00015 | COG1561 |        | Cvib_1556 | uncharacterized stress-induced protein : hypothetical protein                                                                  |
| 165519394  | 0.00015 | COG0372 | K01647 | Cvib_0401 | citrate synthase                                                                                                               |
| 165548035  | 0.00015 | COG0112 | K00600 | Cvib_1381 | glycine hydroxymethyltransferase                                                                                               |
| 165525666  | 0.00014 | COG0099 | K02952 | Cvib_0270 | rpsM; 30S ribosomal protein S13                                                                                                |
| 165502377  | 0.00014 | COG0811 | K03562 | Cvib_1167 | biopolymer transport proteins : MotA/TolQ/ExbB proton channel                                                                  |
| 165519372  | 0.00014 | COG0289 | K00215 | Cvib_0390 | dihydrodipicolinate reductase                                                                                                  |
| 165526294  | 0.00014 | COG0113 | K01698 | Cvib_1252 | delta-aminolevulinic acid dehydratase                                                                                          |
| 165553057  | 0.00014 | COG0142 | K00795 | Cvib_1546 | geranyltranstransferase                                                                                                        |
| 165511739  | 0.00014 | COG1805 | K03614 | Cvib_0796 | Na <sup>+</sup> -transporting NADH:ubiquinone oxidoreductase subunit 2 : electron transport complex, RnfABCDGE type, D subunit |
| 165553087  | 0.00014 | COG0020 | K00806 | Cvib_1531 | undecaprenyl pyrophosphate synthetase                                                                                          |
| 165502433  | 0.00013 | COG0633 | K08953 | Cvib_1151 | ferredoxin : chlorosome envelope protein J                                                                                     |

|            |         |         |        |           |                                                                                                                                                     |
|------------|---------|---------|--------|-----------|-----------------------------------------------------------------------------------------------------------------------------------------------------|
| 165526246  | 0.00013 | COG0174 | K01915 | Cvib_1230 | glutamine synthetase, catalytic region                                                                                                              |
| 165502389  | 0.00013 | COG1729 |        | Cvib_1161 | uncharacterized BCR : tetratricopeptide domain protein                                                                                              |
| 165562927  | 0.00012 | COG2265 | K03428 | Cvib_0317 | SAM-dependent methyltransferases related to tRNA (uracil-5-)-methyltransferase : Mg-protoporphyrin IX methyl transferase                            |
| 165511967  | 0.00012 | COG1538 |        | Cvib_1100 | outer membrane protein : outer membrane efflux protein                                                                                              |
| 165514411* | 0.00012 | COG0085 | K03043 | Cvib_1605 | rpoB; DNA-directed RNA polymerase subunit beta                                                                                                      |
| 165502197  | 0.00012 | COG0045 | K01903 | Cvib_0553 | succinyl-CoA synthetase (ADP-forming) beta subunit                                                                                                  |
| 165525686  | 0.00012 | COG0199 | K02954 | Plut_0194 | rpsN; 30S ribosomal protein S14                                                                                                                     |
| 165548039  | 0.00012 | COG0811 | K03561 | Cvib_1379 | biopolymer transport proteins : MotA/TolQ/ExbB proton channel                                                                                       |
| 165509331* | 0.00012 | COG0007 | K02302 | Cvib_0053 | uroporphyrinogen-III C-methyltransferase                                                                                                            |
| 165518169* | 0.00012 | COG2221 | K00396 | Cvib_0040 | oxidoreductase related to nitrite reductase : sulfite reductase, dissimilatory-type beta subunit                                                    |
| 165547929  | 0.00012 | COG0077 | K04518 | Cvib_1433 | prephenate dehydratase                                                                                                                              |
| 165557761  | 0.00012 | COG0165 | K01755 | Cvib_0883 | argininosuccinate lyase                                                                                                                             |
| 165511743  | 0.00012 | COG1347 | K03613 | Cvib_0794 | Na <sup>+</sup> -transporting NADH:ubiquinone oxidoreductase subunit 4 : SoxR-reducing system protein RsxE; electron transport complex protein RnfE |
| 165511765  | 0.00012 | COG0003 | K01551 | Cvib_0783 | predicted ATPase involved in chromosome partitioning : arsenite-activated ATPase ArsA                                                               |
| 165502673* | 0.00011 | COG1396 |        | Plut_1890 | predicted transcriptional regulators: XRE family                                                                                                    |
| 165505117  | 0.00011 | COG0698 | K01808 | Cvib_0896 | ribose 5-phosphate isomerase RpiB                                                                                                                   |
| 165526204  | 0.00011 | COG0019 | K01586 | Cvib_0705 | diaminopimelate decarboxylase                                                                                                                       |
| 165526060  | 0.00011 | COG0526 | K03671 | Cvib_1012 | thiol-disulfide isomerase and thioredoxins                                                                                                          |
| 165501979* | 0.00010 | COG0568 | K03086 | Cvib_0443 | DNA-directed RNA polymerase sigma subunits (sigma70/sigma32) : RpoH                                                                                 |
| 165525702  | 0.00010 | COG0091 | K02890 | Cvib_0251 | rplV; 50S ribosomal protein L22                                                                                                                     |

|            |         |         |        |           |                                                                                                               |
|------------|---------|---------|--------|-----------|---------------------------------------------------------------------------------------------------------------|
| 165562969  | 0.00010 | COG1225 |        | Cvib_0296 | peroxiredoxin                                                                                                 |
| 165548179  | 0.00010 | COG0484 | K03686 | Cvib_1312 | molecular chaperones (contain C-terminal Zn finger domain) : chaperone protein DnaJ                           |
| 165526058  | 0.00010 | COG0492 | K00384 | Cvib_1011 | thioredoxin reductase                                                                                         |
| 165514477* | 0.00010 | COG1053 | K00239 | Cvib_1638 | succinate dehydrogenase/fumarate reductase, flavoprotein subunits                                             |
| 165514475* | 0.00010 | COG0479 | K00240 | Cvib_1637 | succinate dehydrogenase/fumarate reductase Fe-S protein : succinate dehydrogenase subunit B                   |
| 165514463* | 0.00010 | COG0204 | K00655 | Cvib_1631 | 1-acyl-sn-glycerol-3-phosphate acyltransferase                                                                |
| 165512005  | 0.00010 | COG0499 | K01251 | Cvib_1122 | S-adenosyl-L-homocysteine hydrolase; adenosylhomocysteinase                                                   |
| 165511973  | 0.00010 | COG2077 | K00435 | Cvib_1103 | peroxiredoxin : thiol peroxidase (atypical 2-Cys peroxiredoxin)                                               |
| 165519288* | 0.00009 | COG0031 | K01697 | Cvib_0346 | cysteine synthase                                                                                             |
| 165502065  | 0.00009 | COG2177 | K09811 | Cvib_0478 | cell division protein FtsX                                                                                    |
| 165502349  | 0.00009 | COG1610 | K09117 | Cvib_1181 | uncharacterized ACR : GatB/YqeY domain protein                                                                |
| 165502361  | 0.00009 | COG0065 | K01703 | Cvib_1175 | homoaconitate hydratase family protein; K01703 3-isopropylmalate/(R)-2-methylmalate dehydratase large subunit |
| 165526160  | 0.00009 | COG0047 | K01952 | Cvib_0728 | phosphoribosylformylglycinamide synthase I                                                                    |
| 165526016  | 0.00009 | COG3118 | K05838 | Cvib_0982 | thioredoxin domain-containing protein                                                                         |
| 165525690  | 0.00009 | COG0198 | K02895 | Plut_0192 | rplX; 50S ribosomal protein L24                                                                               |
| 165519322* | 0.00009 | COG2606 |        | Cvib_0364 | uncharacterized ACR : YbaK/prolyl-tRNA synthetase associated region                                           |
| 165502387  | 0.00009 | COG2885 |        | Cvib_1162 | outer membrane protein and related peptidoglycan-associated (lipo)proteins : OmpA/MotB domain protein         |
| 165525762  | 0.00009 | COG0075 | K00839 | Cvib_0221 | serine-pyruvate aminotransferase/archaeal aspartate aminotransferase : aminotransferase, class V              |

|            |         |         |        |              |                                                                                                                                                            |
|------------|---------|---------|--------|--------------|------------------------------------------------------------------------------------------------------------------------------------------------------------|
| 165511763  | 0.00009 | COG0722 | K01626 | Cvib_0784    | 3-Deoxy-D-arabino-heptulosonate 7-phosphate (DAHP) synthase : phospho-2-dehydro-3-heoxyheptonate aldolase; 3-deoxy-7-phosphoheptulonate synthase           |
| 165525764  | 0.00009 | COG3245 |        | Cvib_0220    | cytochrome c5                                                                                                                                              |
| 165514427* | 0.00009 | COG0821 | K03526 | Cvib_1613    | essential bacterial protein, involved in density-dependent regulation of peptidoglycan biosynthesis : 4-hydroxy-3-methylbut-2-en-1-yl diphosphate synthase |
| 165525908  | 0.00009 | COG0216 | K02835 | Cvib_0136    | prfA; peptide chain release factor 1                                                                                                                       |
| 165526270  | 0.00009 | COG1217 | K06207 | Cvib_1242    | predicted membrane GTPase involved in stress response : GTP-binding protein TypA                                                                           |
| 165526178  | 0.00008 | COG0845 | K02005 | Cvib_0719    | membrane-fusion protein : efflux transporter, RND family, MFP subunit; HlyD family secretion protein                                                       |
| 165525656* | 0.00008 | COG0357 | K03501 | Cvib_0275    | predicted S-adenosylmethionine-dependent methyltransferase involved in bacterial cell division: gidB; glucose-inhibited division protein B                 |
| 165519392  | 0.00008 | COG1432 |        | Cvib_0400    | uncharacterized ACR : hypothetical protein                                                                                                                 |
| 165526108  | 0.00008 | COG0021 | K00615 | Cvib_1035    | transketolase subunit B                                                                                                                                    |
| 165502205  | 0.00008 | COG0588 | K01834 | Cvib_0557    | phosphoglycerate mutase 1                                                                                                                                  |
| 165548031  | 0.00008 | COG0458 | K01955 | Cvib_1383    | carbamoyl-phosphate synthase large subunit (split gene in MJ)                                                                                              |
| 165509283* | 0.00008 | COG3360 | K09165 | Cvib_0029    | uncharacterized ACR : protein of unknown function DUF1458; hypothetical protein                                                                            |
| 165514653* | 0.00008 | COG0176 | K00616 | Cvib_1728    | putative transaldolase                                                                                                                                     |
| 165514561* | 0.00008 | COG0243 | K08352 | Cpha266_2562 | anaerobic dehydrogenases, typically selenocysteine-containing : formate dehydrogenase; thiosulfate reductase                                               |
| 165525714  | 0.00008 | COG0051 | K02946 | Cvib_0245    | rpsJ, nusE; 30S ribosomal protein S10                                                                                                                      |
| 165525826  | 0.00008 | COG0290 | K02520 | Cvib_0189    | infC; translation initiation factor IF-3                                                                                                                   |



|                        |         |         |        |           |                                                                                                                        |
|------------------------|---------|---------|--------|-----------|------------------------------------------------------------------------------------------------------------------------|
| 165509297*             | 0.00008 | COG0425 |        | Cvib_0036 | predicted redox protein, regulator of disulfide bond formation : SirA family protein                                   |
| 165526206              | 0.00008 | COG0267 | K02913 | Cvib_0704 | rpmG; 50S ribosomal protein L33                                                                                        |
| 165562999              | 0.00008 | COG2710 | K04039 | Cvib_0282 | nitrogenase molybdenum-iron protein, alpha and beta chains : light-independent protochlorophyllide reductase subunit B |
| 165525658              | 0.00008 | COG0203 | K02879 | Cvib_0274 | rplQ; 50S ribosomal protein L17                                                                                        |
| 165501991*             | 0.00008 | COG1704 | K03744 | Cvib_0448 | uncharacterized ACR : LemA family protein                                                                              |
| 165525684              | 0.00007 | COG0096 | K02994 | Cvib_0260 | rpsH; 30S ribosomal protein S8                                                                                         |
| 165501995*             | 0.00007 | COG3762 | K08988 | Cvib_0450 | predicted membrane protein : protein of unknown function DUF477                                                        |
| 165525960              | 0.00007 | COG1979 | K00001 | Cvib_0955 | uncharacterized oxidoreductases, Fe-dependent alcohol dehydrogenase family                                             |
| 165525712              | 0.00007 | COG0087 | K02906 | Cvib_0246 | rplC; 50S ribosomal protein L3                                                                                         |
| 165519466              | 0.00007 | COG0489 | K03593 | Cvib_0454 | ATP-binding protein involved in chromosome partitioning : protein of unknown function DUF59                            |
| 165536850*             | 0.00007 | COG0003 | K01551 | Cvib_0332 | predicted ATPase involved in chromosome partitioning : arsenite-activated ATPase ArsA                                  |
| 165511901 <sub>b</sub> | 0.00007 | COG1429 | K03403 | Cvib_1057 | cobalamin biosynthesis protein CobN and related Mg-chelatases : hydrogenobyirinic acid a,c-diamide cobaltochelataase   |
| 165553047              | 0.00007 | COG2825 | K06142 | Cvib_1549 | outer membrane protein : outer membrane chaperone Skp (OmpH)                                                           |
| 165547985              | 0.00007 | COG0566 | K03218 | Cvib_1406 | rRNA methylases : RNA methyltransferase, TrmH family, group 3                                                          |
| 165548057              | 0.00007 | COG0635 | K02495 | Cvib_1370 | coproporphyrinogen III oxidase and related Fe-S oxidoreductases                                                        |
| 165525972              | 0.00007 | COG0638 | K01419 | Cvib_0960 | proteasome protease subunit : ATP-dependent HslUV protease, peptidase subunit HslV                                     |

|            |         |         |        |           |                                                                                                                                |
|------------|---------|---------|--------|-----------|--------------------------------------------------------------------------------------------------------------------------------|
| 165548053  | 0.00007 | COG1252 | K03885 | Cvib_1373 | NADH dehydrogenase, FAD-containing subunit : FAD-dependent pyridine nucleotide-disulphide oxidoreductase;                      |
| 165502427  | 0.00007 | COG1595 | K03088 | Cvib_1154 | DNA-directed RNA polymerase specialized sigma subunits, sigma24 homologs : RpoE; RNA polymerase sigma-70 factor, ECF subfamily |
| 165514401* | 0.00006 | COG0776 | K03530 | Plut_1957 | bacterial nucleoid DNA-binding protein : histone-like DNA-binding protein; HU-beta                                             |
| 165502013* | 0.00006 | COG0052 | K02967 | Cvib_0458 | rpsB; 30S ribosomal protein S2                                                                                                 |
| 165525904  | 0.00006 | COG0743 | K00099 | Cvib_0138 | 1-deoxy-D-xylulose 5-phosphate reductoisomerase                                                                                |
| 165514571* | 0.00006 | COG0461 | K00762 | Cvib_1691 | pyrE; orotate phosphoribosyltransferase                                                                                        |
| 165502127  | 0.00006 | COG1692 | K09769 | Cvib_0508 | uncharacterized BCR : metallophosphoesterase                                                                                   |
| 165502831* | 0.00006 | COG2863 | K00540 | Cvib_0008 | cytochrome c553 : sulfide dehydrogenase (flavocytochrome), cytochrome c subunit                                                |
| 165512003  | 0.00006 | COG0192 | K00789 | Cvib_1121 | S-adenosylmethionine synthetase                                                                                                |
| 165562939  | 0.00006 | COG1278 | K03704 | Cvib_0310 | cold shock proteins : cold-shock DNA-binding protein family (beta-ribbon, CspA family)                                         |
| 165502325  | 0.00006 | COG1592 |        | Cvib_1193 | rubrerythrin                                                                                                                   |
| 165514457* | 0.00006 | COG0056 | K02111 | Cvib_1628 | FOF1 ATP synthase subunit alpha                                                                                                |
| 165502099  | 0.00006 | COG0854 | K03474 | Cvib_0494 | pyridoxal phosphate biosynthetic protein PdxJ; pyridoxine 5-phosphate synthase                                                 |
| 165562943  | 0.00006 | COG2319 |        | Cvib_0309 | WD-40 repeat protein                                                                                                           |
| 165548049  | 0.00006 | COG0160 | K00818 | Cvib_1374 | PLP-dependent aminotransferases : acetylornithine and succinylornithine aminotransferase                                       |
| 165547915  | 0.00006 | COG0458 | K01955 | Cvib_1440 | carbamoyl-phosphate synthase large subunit (split gene in MJ)                                                                  |
| 165501985* | 0.00006 | COG0612 |        | Cvib_0445 | predicted Zn-dependent peptidases                                                                                              |
| 165501959* | 0.00006 | COG1611 | K06966 | Cvib_0416 | predicted Rossmann fold nucleotide-binding protein : conserved hypothetical protein 730                                        |

|            |         |         |        |           |                                                                                                                                    |
|------------|---------|---------|--------|-----------|------------------------------------------------------------------------------------------------------------------------------------|
| 165511907  | 0.00006 | COG1239 | K03405 | Cvib_1059 | Mg-chelatase subunit ChII : protoporphyrin IX magnesium-chelatase                                                                  |
| 165502365  | 0.00006 | COG0473 | K00052 | Cvib_1173 | isocitrate/isopropylmalate dehydrogenase                                                                                           |
| 165547721* | 0.00005 | COG0154 | K02433 | Cvib_1530 | aspartyl/glutamyl-tRNA(Asn/Gln) amidotransferase subunit A                                                                         |
| 165512001  | 0.00005 | COG1209 | K00973 | Cvib_1120 | dTDP-glucose pyrophosphorylase : 3 glucose-1-phosphate thymidyltransferase                                                         |
| 165526008  | 0.00005 | COG0605 | K04564 | Cvib_0978 | superoxide dismutase, Fe-Mn family                                                                                                 |
| 165525688  | 0.00005 | COG0094 | K02931 | Cvib_0258 | rplE; 50S ribosomal protein L5                                                                                                     |
| 165548233  | 0.00005 | COG0149 | K01803 | Cvib_1275 | triosephosphate isomerase                                                                                                          |
| 165525674  | 0.00005 | COG0200 | K02876 | Cvib_0265 | rplO; 50S ribosomal protein L15                                                                                                    |
| 165511945  | 0.00005 | COG1143 | K00338 | Cvib_1088 | formate hydrogenlyase subunit 6/NADH:ubiquinone oxidoreductase 23 kD subunit (chain I)                                             |
| 165511741  | 0.00005 | COG2869 |        | Cvib_0795 | Na <sup>+</sup> -transporting NADH:ubiquinone oxidoreductase gamma subunit : electron transport complex, RnfABCDGE type, G subunit |
| 165502243  | 0.00005 | COG0178 | K03701 | Cvib_0583 | excinuclease ABC subunit A                                                                                                         |
| 165526286  | 0.00005 | COG0777 | K01966 | Cvib_1248 | acetyl-CoA carboxylase beta subunit : propionyl-CoA carboxylase beta chain                                                         |
| 165548017  | 0.00005 | COG0205 | K00850 | Cvib_1390 | 6-phosphofructokinase                                                                                                              |
| 165502343  | 0.00005 | COG2873 | K01740 | Cvib_1184 | O-acetylhomoserine/O-acetyls erine sulfhydrylase                                                                                   |
| 165511795  | 0.00005 | COG0436 | K00812 | Cvib_0768 | PLP-dependent aminotransferases : aspartate aminotransferase                                                                       |
| 165514397* | 0.00005 | COG1013 | K00175 | Cvib_1598 | pyruvate:ferredoxin oxidoreductase and related 2-oxoacid:ferredoxin oxidoreductases, beta subunit                                  |
| 165553021  | 0.00005 | COG0195 | K02600 | Cvib_1562 | nusA; transcription elongation factor NusA; N utilization substance protein A                                                      |
| 165514415* | 0.00005 | COG0244 | K02864 | Cvib_1607 | rplJ; 50S ribosomal protein L10                                                                                                    |

|            |         |         |        |           |                                                                                                                 |
|------------|---------|---------|--------|-----------|-----------------------------------------------------------------------------------------------------------------|
| 165525916  | 0.00005 | COG0446 |        | Cvib_0131 | uncharacterized NAD(FAD)-dependent dehydrogenases : FAD-dependent pyridine nucleotide-disulphide oxidoreductase |
| 165526186  | 0.00005 | COG2885 |        | Cvib_0715 | outer membrane protein and related peptidoglycan-associated (lipo)proteins : OmpA/MotB domain protein           |
| 165514585* | 0.00005 | COG2062 | K08296 | Cvib_1698 | phosphohistidine phosphatase SixA                                                                               |
| 165525698  | 0.00005 | COG0197 | K02878 | Cvib_0253 | rplP; 50S ribosomal protein L16                                                                                 |
| 165501973* | 0.00005 | COG1351 | K03465 | Plut_0366 | predicted alternative thymidylate synthase: thyX                                                                |
| 165548141  | 0.00004 | COG0211 | K02899 | Cvib_1330 | rpmA; 50S ribosomal protein L27                                                                                 |
| 165547947  | 0.00004 | COG1185 | K00962 | Cvib_1424 | polyribonucleotide nucleotidyltransferase (polynucleotide phosphorylase)                                        |
| 165502321  | 0.00004 | COG0450 | K03386 | Cvib_1195 | peroxiredoxin (alkyl hydroperoxide reductase subunit C)                                                         |
| 165525706  | 0.00004 | COG0090 | K02886 | Cvib_0249 | rplB; 50S ribosomal protein L2                                                                                  |
| 165562989  | 0.00004 | COG0241 | K05602 | Cvib_0287 | histidinol-phosphate phosphatase family protein                                                                 |
| 165502123  | 0.00004 | COG0623 | K00208 | Cvib_0506 | enoyl-[acyl-carrier-protein] reductase [NADH]                                                                   |
| 165502053  | 0.00004 | COG1734 |        | Cvib_0476 | DnaK suppressor protein : transcriptional regulator, TraR/DksA family                                           |
| 165502207  | 0.00004 | COG0069 | K00284 | Cvib_0558 | glutamate synthase (NADH) large subunit; K00284<br>glutamate synthase (ferredoxin)                              |
| 165514485* | 0.00004 | COG0841 |        | Cvib_1642 | cation/multidrug efflux pump : acriflavin resistance protein                                                    |
| 165550957  | 0.00004 | COG0335 | K02884 | Cvib_0932 | rplS; 50S ribosomal protein L19                                                                                 |
| 165547723* | 0.00004 | COG0074 | K01902 | Cvib_1529 | succinyl-CoA synthetase (ADP-forming) alpha subunit                                                             |
| 165502827* | 0.00004 | COG0342 | K03072 | Cvib_0010 | secD; preprotein translocase subunit SecD                                                                       |
| 165547889  | 0.00004 | COG1151 | K00378 | Cvib_1455 | 6Fe-6S prismatic cluster-containing protein : hydroxylamine reductase                                           |
| 165501971* | 0.00004 | COG0777 | K01963 | Cvib_0422 | acetyl-CoA carboxylase beta subunit : acetyl-coenzyme A carboxylase carboxyl transferase subunit alpha          |

|            |         |         |        |                  |                                                                                                                                                     |
|------------|---------|---------|--------|------------------|-----------------------------------------------------------------------------------------------------------------------------------------------------|
| 165526020  | 0.00004 | COG0277 |        | Cvib_0987        | FAD linked oxidase domain protein                                                                                                                   |
| 165526194  | 0.00004 | COG1825 | K02897 | Cvib_0711        | 50S ribosomal protein L25/general stress protein Ctc                                                                                                |
| 165512009  | 0.00004 | COG0596 |        | Cvib_1124        | predicted hydrolases or acyltransferases (alpha/beta hydrolase superfamily)                                                                         |
| 165525836  | 0.00004 | COG0238 | K02963 | Cvib_0183        | rpsR; 30S ribosomal protein S18                                                                                                                     |
| 165525680  | 0.00003 | COG0256 | K02881 | Cvib_0262        | rplR; 50S ribosomal protein L18                                                                                                                     |
| 165547963  | 0.00003 | COG0780 | K06879 | Cvib_1417        | enzyme related to GTP cyclohydrolase I : 7-cyano-7-deazaguanine reductase                                                                           |
| 165514617* | 0.00003 | COG0550 | K03168 | Cvib_1714        | topoisomerase IA                                                                                                                                    |
| 165525894  | 0.00003 | COG1090 | K07071 | Cvib_0161        | predicted nucleoside-diphosphate sugar epimerases (SulA family) : domain of unknown function DUF1731                                                |
| 165525944  | 0.00003 | COG0376 | K03782 | cpb:Cphamn1_0152 | catalase/peroxidase HPI                                                                                                                             |
| 165553059  | 0.00003 | COG1304 | K01823 | Cvib_1545        | L-lactate dehydrogenase (FMN-dependent) and related alpha-hydroxy acid dehydrogenases : isopentenyl pyrophosphate isomerase                         |
| 165502021  | 0.00003 | COG3347 |        | Cvib_0462        | uncharacterized ACR : short chain dehydrogenase                                                                                                     |
| 165502163  | 0.00003 | COG0652 | K03767 | Cvib_0535        | peptidyl-prolyl cis-trans isomerase (rotamase) - cyclophilin family                                                                                 |
| 165526224  | 0.00003 | COG0451 | K01795 | Cvib_1219        | nucleoside-diphosphate-sugar epimerases : NAD-dependent epimerase/dehydratase                                                                       |
| 165548235  | 0.00003 | COG0422 | K03147 | Cvib_1273        | thiamine biosynthesis protein ThiC                                                                                                                  |
| 165553035  | 0.00003 | COG0194 | K00942 | Cvib_1555        | gmk; guanylate kinase                                                                                                                               |
| 165550983  | 0.00003 | COG1004 | K00012 | Cvib_0945        | Predicted UDP-glucose 6-dehydrogenase                                                                                                               |
| 165519410  | 0.00003 | COG0254 | K02909 | Plut_0349        | rpmE; 50S ribosomal protein L31                                                                                                                     |
| 165519370  | 0.00003 | COG1475 | K03497 | Cvib_0389        | predicted transcriptional regulators : chromosome segregation DNA-binding protein; ParB family                                                      |
| 165505127  | 0.00003 | COG0191 | K01624 | Cvib_0892        | fructose-bisphosphate aldolase                                                                                                                      |
| 165514563* | 0.00003 | COG0437 | K04014 | Cpha266_2563     | Fe-S-cluster-containing hydrogenase components 1 : 4Fe-4S ferredoxin, iron-sulfur binding domain protein; formate-dependent nitrite reductase, Fe-S |

|            |         |         |        |           |                                                                                                                     |
|------------|---------|---------|--------|-----------|---------------------------------------------------------------------------------------------------------------------|
|            |         |         |        |           | protein                                                                                                             |
| 165562929  | 0.00003 | COG1032 | K04035 | Cvib_0316 | Fe-S oxidoreductases family 2 : magnesium-protoporphyrin IX monomethyl ester anaerobic oxidative cyclase            |
| 165562921  | 0.00003 | COG1629 | K02014 | CT1953    | outer membrane receptor proteins, mostly Fe transport : ferric siderophore receptor, putative, TonB receptor family |
| 165519408  | 0.00003 | COG0233 | K02838 | Cvib_0408 | ribosome recycling factor                                                                                           |
| 165526146  | 0.00003 | COG1032 |        | Cvib_1051 | Fe-S oxidoreductases family 2 : radical SAM domain protein                                                          |
| 165519340* | 0.00003 | COG0364 | K00036 | Cvib_0375 | glucose-6-phosphate 1-dehydrogenase                                                                                 |
| 165502423  | 0.00003 | COG0640 | K03892 | Cvib_1156 | predicted transcriptional regulators : ArsR family                                                                  |
| 165562991  | 0.00003 | COG0297 | K00703 | Cvib_0286 | glycogen/starch synthase, ADP-glucose type                                                                          |
| 165501977* | 0.00003 | COG0525 | K01873 | Cvib_0442 | valS; valyl-tRNA synthetase                                                                                         |
| 165515179  | 0.00003 | COG0712 | K02113 | Cvib_1740 | FOF1-type ATP synthase delta subunit (mitochondrial oligomycin sensitivity protein)                                 |
| 165509255* | 0.00003 | COG1530 | K08301 | Cvib_0016 | ribonucleases G and E : Rne/Rng family                                                                              |
| 165526126  | 0.00002 | COG0330 |        | Plut_1305 | membrane protease subunits, stomatin/prohibitin homologs : band 7 protein                                           |
| 165563005  | 0.00002 | COG0104 | K01939 | Cvib_0279 | adenylosuccinate synthetase                                                                                         |
| 165502333  | 0.00002 | COG0513 | K05592 | Cvib_1189 | superfamily II DNA and RNA helicases : DEAD/DEAH box helicase domain protein                                        |
| 165514511* | 0.00002 | COG0702 |        | Cvib_1655 | predicted nucleoside-diphosphate-sugar epimerases : NAD-dependent epimerase/dehydratase                             |
| 165511735  | 0.00002 | COG2878 |        | Cvib_0798 | predicted alternative beta subunit of Na <sup>+</sup> -transporting NADH:ubiquinone oxidoreductase : ferredoxin     |
| 165548065  | 0.00002 | COG1509 | K01843 | Cvib_1367 | L-lysine 2,3-aminomutase                                                                                            |

|                        |         |         |        |              |                                                                                                                     |
|------------------------|---------|---------|--------|--------------|---------------------------------------------------------------------------------------------------------------------|
| 165502839*             | 0.00002 | COG0592 | K02338 | Cvib_0002    | DNA polymerase sliding clamp subunit (PCNA homolog) : DNA polymerase III, beta subunit                              |
| 165502087              | 0.00002 | COG1463 |        | Cvib_0488    | permease component of an ABC-transporter : mammalian cell entry related domain protein                              |
| 165525662              | 0.00002 | COG0522 | K02986 | Cvib_0272    | rpsD; 30S ribosomal protein S4                                                                                      |
| 165519336*             | 0.00002 | COG1028 |        | Cvib_0372    | dehydrogenases with different specificities (related to short-chain alcohol dehydrogenases)                         |
| 165525742              | 0.00002 | COG0536 | K03979 | Cvib_0231    | predicted GTPase : obgE, yhbZ, obg, cgtA; GTPase ObgE                                                               |
| 165557789              | 0.00002 | COG0045 |        | Cvib_0867    | succinyl-CoA synthetase beta subunit : ATP citrate lyase subunit 1                                                  |
| 165502295              | 0.00002 | COG1945 | K02626 | Cvib_1209    | uncharacterized ACR : pyruvoyl-dependent arginine decarboxylase                                                     |
| 165562923 <sub>b</sub> | 0.00002 | COG1429 | K06050 | Cvib_0320    | cobalamin biosynthesis protein CobN and related Mg-chelatases : hydrogenobyrinic acid a,c-diamide cobaltochelataase |
| 165525722              | 0.00002 | COG0048 | K02950 | Cvib_0241    | rpsL; 30S ribosomal protein S12                                                                                     |
| 165525678              | 0.00002 | COG0098 | K02988 | Cvib_0263    | rpsE; 30S ribosomal protein S5                                                                                      |
| 165502367              | 0.00002 | COG0059 | K00053 | Cvib_1172    | ketol-acid reductoisomerase                                                                                         |
| 165514527*             | 0.00002 | COG0330 |        | Cvib_1667    | membrane protease subunits, stomatin/prohibitin homologs : SPFH domain, band 7 family protein                       |
| 165502009*             | 0.00002 | COG0102 | K02871 | Cvib_0456    | rplM; 50S ribosomal protein L13                                                                                     |
| 165505071              | 0.00002 | COG0589 |        | Cvib_0918    | universal stress protein UspA and related nucleotide-binding proteins                                               |
| 165525694              | 0.00002 | COG0186 | K02961 | Cvib_0255    | rpsQ; 30S ribosomal protein S17                                                                                     |
| 165547949              | 0.00002 | COG0414 | K01918 | Cvib_1423    | pantothenate synthetase; pantoate--beta-alanine ligase                                                              |
| 165548085              | 0.00002 | COG2873 | K01740 | cch:Cag_1257 | O-acetylhomoserine/O-acetylserine sulfhydrylase                                                                     |
| 165502203              | 0.00001 | COG2070 |        | Cvib_0556    | dioxygenases related to 2-nitropropane dioxygenase                                                                  |
| 165550995              | 0.00001 | COG0563 | K00939 | Cvib_0952    | adenylate kinase and related kinases                                                                                |

|            |         |         |        |              |                                                                                                                                                             |
|------------|---------|---------|--------|--------------|-------------------------------------------------------------------------------------------------------------------------------------------------------------|
| 165525902  | 0.00001 | COG0465 | K03798 | Cvib_0139    | ATP-dependent Zn proteases : FtsH; cell division protease                                                                                                   |
| 165509287* | 0.00001 | COG0243 |        | Plut_0027    | anaerobic dehydrogenases, typically selenocysteine-containing : molybdenum enzyme related to thiosulfate reductase and polysulfide reductase, large subunit |
| 165526192  | 0.00001 | COG0462 | K00948 | Cvib_0712    | phosphoribosylpyrophosphate synthetase : ribose-phosphate pyrophosphokinase                                                                                 |
| 165502889* | 0.00001 | COG0206 | K03531 | Cvib_1749    | cell division protein FtsZ                                                                                                                                  |
| 165509325* | 0.00001 | COG0437 |        | Cvib_0050    | Fe-S-cluster-containing hydrogenase components 1 : 4Fe-4S ferredoxin, iron-sulfur binding domain protein                                                    |
| 165525812  | 0.00001 | COG0236 | K02078 | Cvib_0197    | acyl carrier protein                                                                                                                                        |
| 165502351  | 0.00001 | COG0300 | K00059 | Cvib_1180    | short-chain dehydrogenase/reductase SDR                                                                                                                     |
| 165502011* | 0.00001 | COG0103 | K02996 | Cvib_0457    | rpsI; 30S ribosomal protein S9                                                                                                                              |
| 165514403* | 0.00001 | COG0231 | K02356 | Cvib_1601    | translation elongation factor P (EF-P)                                                                                                                      |
| 165553067  | 0.00001 | COG0268 | K02968 | Cvib_1540    | rpsT; 30S ribosomal protein S20                                                                                                                             |
| 165519310* | 0.00001 | COG0668 |        | Cvib_0357    | small-conductance mechanosensitive channel                                                                                                                  |
| 165511815  | 0.00001 | COG3808 | K01507 | Cvib_0758    | inorganic pyrophosphatase : hppA; membrane-bound proton-translocating pyrophosphatase                                                                       |
| 165502023  | 0.00001 | COG1830 | K08321 | Cvib_0463    | DhnA-type fructose-1,6-bisphosphate aldolase and related enzymes                                                                                            |
| 165514567* | 0.00001 | COG0446 | K00540 | Cpha266_2569 | uncharacterized NAD(FAD)-dependent dehydrogenases : sulfide-quinone reductase                                                                               |
| 165502077  | 0.00001 | COG0138 | K01492 | Cvib_0483    | phosphoribosylaminoimidazolecarboxamide formyltransferase / IMP cyclohydrolase                                                                              |
| 165514431* | 0.00001 | COG0148 | K01689 | Cvib_1615    | enolase                                                                                                                                                     |
| 165525838  | 0.00000 | COG0629 | K03111 | Plut_0115    | single-strand DNA-binding protein                                                                                                                           |
| 165502007* | 0.00000 | COG1160 | K03977 | Cvib_0455    | predicted GTPases: engA, yfgK, yphC; GTP-binding protein EngA                                                                                               |
| 165526038  | 0.00000 | COG0226 | K02040 | Cvib_0997    | phosphate binding protein; phosphate transport system substrate-binding protein                                                                             |



12.7 m - KEGG and NR annotated proteins

| Gene ID                | normalised spectral abundance | NR identifier | KO identifier | KEGG / NR locus tag | KEGG / NR description                                             |
|------------------------|-------------------------------|---------------|---------------|---------------------|-------------------------------------------------------------------|
| 165547733*             | 0.01965                       |               |               | Cvib_1525           | hypothetical protein                                              |
| 165512927              | 0.01028                       |               |               | Cpha266_2650        | hypothetical protein                                              |
| 165511987              | 0.00235                       |               | K03075        | Cvib_1110           | secG; preprotein translocase subunit SecG                         |
| 165514495*             | 0.00209                       |               | K08946        | Cvib_1647           | chlorosome envelope protein B                                     |
| 165512925              | 0.00200                       |               | K08252        | Cpha266_2649        | lipopolysaccharide biosynthesis; receptor protein-tyrosine kinase |
| 165571674              | 0.00148                       |               |               | dac:Daci_1946       | putative phage major head protein                                 |
| 165563017              | 0.00148                       |               |               | ava:Ava_1043        | methyltransferase FkbM                                            |
| 165502419              | 0.00139                       |               | K08943        | Cvib_1159           | photosystem P840 reaction center protein PscD                     |
| 165519328*             | 0.00133                       |               | K08946        | Cvib_0367           | chlorosome envelope protein B                                     |
| 165547761*             | 0.00123                       |               |               | Cvib_1511           | hypothetical protein                                              |
| 165525930              | 0.00094                       |               |               | Cvib_0125           | hypothetical protein                                              |
| 165525844              | 0.00090                       |               |               | Cvib_0179           | hypothetical protein                                              |
| 165526256              | 0.00077                       |               | K08951        | Cvib_1234           | chlorosome envelope protein H                                     |
| 165552335*             | 0.00074                       |               | K08947        | Cvib_0329           | chlorosome envelope protein C                                     |
| 165526330              | 0.00072                       |               |               | cpb:Cphamn1_2160    | CRISPR-associated protein, CSE2 family                            |
| 165547799              | 0.00067                       |               |               | Cvib_1499           | alpha amylase, catalytic region                                   |
| 165512931*             | 0.00063                       |               |               | cch:Cag_0645        | hypothetical protein                                              |
| 165547879              | 0.00057                       |               |               | Cvib_1459           | cytochrome c, putative                                            |
| 165502219              | 0.00057                       |               |               | amr:AM1_B0391       | hypothetical protein                                              |
| 165526074              | 0.00052                       |               |               | Cvib_1019           | sodium pump decarboxylase, gamma subunit                          |
| 165514639*             | 0.00052                       |               |               | Cvib_1720           | hypothetical protein                                              |
| 165562993              | 0.00049                       |               |               | Cvib_0285           | hypothetical protein                                              |
| 165548153              | 0.00048                       |               | K08944        | Cvib_1325           | bacteriochlorophyll A protein                                     |
| 165531268 <sub>c</sub> | 0.00047                       |               |               | bvi:Bcep1808_1173   | hypothetical protein                                              |
| 165526332              | 0.00047                       |               |               | cpb:Cphamn1_2161    | CRISPR-associated protein, CSE3 family                            |

|                        |         |  |        |              |                                                                                                             |
|------------------------|---------|--|--------|--------------|-------------------------------------------------------------------------------------------------------------|
| 165502381              | 0.00046 |  |        | Cvib_1165    | TonB-like protein                                                                                           |
| 165511855              | 0.00037 |  |        | Cvib_0746    | hypothetical protein                                                                                        |
| 165514665*             | 0.00035 |  | K05807 | Cvib_1734    | putative lipoprotein                                                                                        |
| 165548239              | 0.00034 |  |        | Plut_0883    | hypothetical protein                                                                                        |
| 165501961              | 0.00034 |  |        | Cvib_0417    | hypothetical protein                                                                                        |
| 165550963              | 0.00034 |  | K02959 | Plut_0966    | rpsP; 30S ribosomal protein S16                                                                             |
| 165505939              | 0.00033 |  |        | Cvib_0841    | 4Fe-4S ferredoxin, iron-sulfur binding domain protein                                                       |
| 165519418 <sub>d</sub> | 0.00032 |  |        | Cvib_0413    | hypothetical protein                                                                                        |
| 165547769              | 0.00029 |  |        | Cvib_1507    | hypothetical protein                                                                                        |
| 165519030*             | 0.00027 |  |        | cbf:CLI_2438 | hypothetical protein                                                                                        |
| 165525752              | 0.00027 |  |        | Cvib_0226    | hypothetical protein                                                                                        |
| 165511809              | 0.00026 |  |        | Cvib_0760    | cytochrome c family protein                                                                                 |
| 165514873*             | 0.00024 |  |        | Cvib_1579    | hypothetical protein                                                                                        |
| 165550993              | 0.00024 |  |        | Cvib_0951    | hypothetical protein                                                                                        |
| 165514437*             | 0.00024 |  | K08941 | Cvib_1618    | 4Fe-4S ferredoxin, iron-sulfur binding domain protein; photosystem P840 reaction center iron-sulfur protein |
| 165547729              | 0.00023 |  |        | Cvib_1527    | hypothetical protein                                                                                        |
| 165502893              | 0.00022 |  |        | Cvib_1747    | O-methyltransferase, family 2                                                                               |
| 165547803              | 0.00022 |  |        | Cvib_1498    | hypothetical protein                                                                                        |
| 165514537*             | 0.00020 |  |        | Cvib_1673    | alpha amylase, catalytic region                                                                             |
| 165525748              | 0.00016 |  |        | Cvib_0228    | hypothetical protein                                                                                        |
| 165502181              | 0.00015 |  |        | Cpha266_0714 | hypothetical protein                                                                                        |
| 165526208              | 0.00015 |  | K07164 | Cvib_0703    | protein of unknown function DUF164                                                                          |
| 165502165              | 0.00014 |  |        | Cvib_0536    | TPR repeat-containing protein                                                                               |
| 165526334              | 0.00013 |  |        | cte:CT1975   | hypothetical protein                                                                                        |
| 165547961              | 0.00013 |  | K08942 | Cvib_1418    | photosystem P840 reaction center cytochrome c-551                                                           |
| 165502029              | 0.00012 |  |        | Cvib_0466    | hypothetical protein                                                                                        |
| 165505111              | 0.00011 |  |        | Cvib_0901    | hypothetical protein                                                                                        |
| 165557793              | 0.00011 |  |        | Cvib_0865    | chlorosome envelope protein B                                                                               |

|                        |         |             |        |                   |                                                                      |
|------------------------|---------|-------------|--------|-------------------|----------------------------------------------------------------------|
| 165548243              | 0.00011 |             |        | cpb:Cphamn1_0811  | hypothetical protein                                                 |
| 165562965              | 0.00011 |             |        | Cvib_0298         | hypothetical protein                                                 |
| 165551017              | 0.00010 | ZP_01060966 |        | MED217_12439      | hypothetical protein                                                 |
| 165548069              | 0.00010 |             |        | Cvib_1365         | GCN5-related N-acetyltransferase                                     |
| 165548181              | 0.00010 |             |        | Cvib_1311         | hypothetical protein                                                 |
| 165514447*             | 0.00009 |             |        | Cvib_1623         | cytochrome c, class I                                                |
| 165513587              | 0.00007 |             |        | Cvib_0828         | hypothetical protein                                                 |
| 165509309*             | 0.00007 |             |        | Cvib_0042         | hypothetical protein                                                 |
| 165502185              | 0.00006 |             |        | Cpha266_0718      | hypothetical protein                                                 |
| 165548171              | 0.00006 |             |        | Cvib_1316         | hypothetical protein                                                 |
| 165502237              | 0.00006 |             |        | Cvib_0580         | hypothetical protein                                                 |
| 165570114 <sub>c</sub> | 0.00005 |             |        | bvi:Bcep1808_1173 | hypothetical protein                                                 |
| 165532404*             | 0.00004 |             | K08945 | Cvib_0330         | bacteriochlorophyll C binding protein; chlorosome envelope protein A |
| 165514439*             | 0.00004 |             | K08940 | Cvib_1619         | photosystem P840 reaction center, large subunit                      |
| 165505087              | 0.00004 |             |        | Cvib_0912         | hypothetical protein                                                 |
| 165526028              | 0.00004 |             |        | Cvib_0992         | phosphate uptake regulator, PhoU                                     |
| 165547971              | 0.00004 |             |        | Cvib_1413         | hypothetical protein                                                 |
| 165511805              | 0.00003 |             |        | Cvib_0762         | hypothetical protein                                                 |
| 165525848              | 0.00003 |             |        | Cvib_0177         | hypothetical protein                                                 |
| 165548087              | 0.00003 |             |        | Cvib_1356         | MOSC domain containing protein                                       |
| 165519298*             | 0.00003 |             |        | Cvib_0351         | hypothetical protein                                                 |
| 165508719              | 0.00003 |             |        | xft:PD0972        | hypothetical protein                                                 |
| 165562895              | 0.00003 |             |        | Cvib_0331         | hypothetical protein                                                 |
| 165509277*             | 0.00002 |             |        | Cvib_0026         | redoxin domain protein                                               |
| 165523112              | 0.00002 |             |        | pmn:PMN2A_1227    | hypothetical protein                                                 |
| 165553037              | 0.00001 |             |        | Plut_1772         | hypothetical protein                                                 |
| 165548159              | 0.00001 |             |        | Cvib_1322         | sporulation domain protein                                           |
| 165525928 <sub>d</sub> | 0.00001 |             |        | Cvib_0126         | hypothetical protein                                                 |

**12.7 m - Proteins with no annotation**

|                        |         |  |  |  |  |
|------------------------|---------|--|--|--|--|
| 165502275              | 0.00389 |  |  |  |  |
| 165497987              | 0.00265 |  |  |  |  |
| 165499977*             | 0.00077 |  |  |  |  |
| 165506645 <sub>e</sub> | 0.00072 |  |  |  |  |
| 165563289 <sub>e</sub> | 0.00049 |  |  |  |  |
| 165566413 <sub>e</sub> | 0.00035 |  |  |  |  |
| 165563289              | 0.00012 |  |  |  |  |
| 165503831              | 0.00006 |  |  |  |  |
| 165525058 <sub>e</sub> | 0.00006 |  |  |  |  |
| 165519980*             | 0.00005 |  |  |  |  |
| 165549781 <sub>e</sub> | 0.00005 |  |  |  |  |
| 165509979*             | 0.00002 |  |  |  |  |

| <b>14 m - COG annotated proteins</b> |                                      |                       |                      |                       |                                                                                      |
|--------------------------------------|--------------------------------------|-----------------------|----------------------|-----------------------|--------------------------------------------------------------------------------------|
| <b>Gene ID</b>                       | <b>normalised spectral abundance</b> | <b>COG identifier</b> | <b>KO identifier</b> | <b>KEGG locus tag</b> | <b>COG description : KEGG description</b>                                            |
| 166198186                            | 0.06300                              | COG0149               | K01803               | Cvib_1275             | triosephosphate isomerase                                                            |
| 166137511                            | 0.04782                              | COG0157               | K03813               | Cvib_1491             | nicotinate-nucleotide pyrophosphorylase : ModD protein; molybdenum transport protein |
| 166198448                            | 0.04506                              | COG0776               | K03530               | Plut_1957             | bacterial nucleoid DNA-binding protein : histone-like DNA-binding protein; HU-beta   |
| 166172204                            | 0.03837                              | COG0329               | K01714               | Cvib_1403             | dihydrodipicolinate synthase/N-acetylneuraminate lyase                               |
| 166126920                            | 0.03524                              | COG0526               | K03671               | Cvib_1012             | thiol-disulfide isomerase and thioredoxins                                           |
| 166145532 <sub>a</sub>               | 0.03313                              | COG0459               | K04077               | Cvib_0586             | chaperonin GroEL (HSP60 family)                                                      |
| 166124688                            | 0.03285                              | COG1899               | K00809               | Cvib_1729             | deoxyhypusine synthase                                                               |
| 166179415                            | 0.02422                              | COG2406               | K03594               | Cvib_1194             | uncharacterized ACR : ferritin, Dps family protein                                   |
| 166074810                            | 0.02266                              | COG2165               |                      |                       | general secretory pathway proteins G and H and related periplasmic/secreted proteins |

|           |         |         |        |           |                                                                                                                     |
|-----------|---------|---------|--------|-----------|---------------------------------------------------------------------------------------------------------------------|
| 166188979 | 0.01945 | COG0459 | K04077 | Cvib_0586 | chaperonin GroEL (HSP60 family)                                                                                     |
| 166184768 | 0.01314 | COG1629 | K02014 | CT1953    | outer membrane receptor proteins, mostly Fe transport : ferric siderophore receptor, putative, TonB receptor family |
| 166090652 | 0.01164 | COG1629 | K02014 | CT1953    | outer membrane receptor proteins, mostly Fe transport : ferric siderophore receptor, putative, TonB receptor family |
| 166103931 | 0.01162 | COG2885 |        | Cvib_0715 | outer membrane protein and related peptidoglycan-associated (lipo)proteins : OmpA/MotB domain protein               |
| 166147146 | 0.01120 | COG0522 | K02986 | Cvib_0272 | rpsD; 30S ribosomal protein S4; K02986 small subunit ribosomal protein S4                                           |
| 166118837 | 0.01040 | COG0605 | K04564 | Cvib_0978 | superoxide dismutase : Fe-Mn family                                                                                 |
| 166147056 | 0.01018 | COG0045 |        | Cvib_0867 | succinyl-CoA synthetase beta subunit : ATP citrate lyase subunit 1                                                  |
| 166109428 | 0.00951 | COG1704 | K03744 | Cvib_0448 | uncharacterized ACR : LemA family protein                                                                           |
| 166140297 | 0.00925 | COG2165 |        |           | general secretory pathway proteins G and H and related periplasmic/secreted proteins                                |
| 166105505 | 0.00911 | COG0723 | K02636 | Cvib_1501 | rieske Fe-S protein : plastoquinol--plastocyanin reductase; cytochrome b6-f complex iron-sulfur subunit             |
| 166164770 | 0.00908 | COG0284 | K01591 | Cvib_0140 | orotidine 5'-phosphate decarboxylase                                                                                |
| 166118277 | 0.00863 | COG0080 | K02867 | Plut_1966 | rplK; 50S ribosomal protein L11                                                                                     |
| 166129078 | 0.00843 | COG0055 | K02112 | Cvib_0025 | FOF1-type ATP synthase beta subunit                                                                                 |
| 166150726 | 0.00842 | COG0054 | K00794 | Cvib_1632 | riboflavin synthase beta-chain : 6,7-dimethyl-8-ribityllumazine synthase                                            |
| 166160341 | 0.00833 | COG2165 |        | MXAN_5783 | general secretory pathway proteins G and H and related periplasmic/secreted proteins : pilA; pilin                  |
| 166090624 | 0.00817 | COG0446 | K00540 | Cvib_0009 | uncharacterized NAD(FAD)-dependent dehydrogenases : sulfide dehydrogenase (flavocytochrome), flavoprotein subunit   |

|                        |         |         |        |              |                                                                                                                           |
|------------------------|---------|---------|--------|--------------|---------------------------------------------------------------------------------------------------------------------------|
| 166091252              | 0.00741 | COG0181 | K01749 | Cvib_1245    | porphobilinogen deaminase : hydroxymethylbilane synthase                                                                  |
| 166159279              | 0.00737 | COG0074 |        | Cvib_0866    | succinyl-CoA synthetase alpha subunit : ATP citrate lyase subunit 2                                                       |
| 166131402              | 0.00732 | COG0776 | K05788 | Cvib_1506    | bacterial nucleoid DNA-binding protein : histone family protein DNA-binding protein; integration host factor subunit beta |
| 166196008              | 0.00715 | COG0056 | K02111 | Cvib_1628    | F0F1-type ATP synthase alpha subunit                                                                                      |
| 166145114              | 0.00711 | COG0050 | K02358 | Cvib_0244    | GTPases - translation elongation factors : tuf                                                                            |
| 166114564              | 0.00664 | COG0056 | K02111 | Cvib_1628    | F0F1-type ATP synthase alpha subunit                                                                                      |
| 166136070              | 0.00664 | COG2838 | K00031 | Cvib_0507    | monomeric isocitrate dehydrogenase                                                                                        |
| 166175476              | 0.00652 | COG0724 |        | Cvib_0890    | RNA-binding proteins (RRM domain) : RNP-1 like RNA-binding protein                                                        |
| 166136072              | 0.00648 | COG0623 | K00208 | Cvib_0506    | enoyl-[acyl-carrier-protein] reductase (NADH)                                                                             |
| 166076054              | 0.00647 | COG0633 | K08953 | Cvib_1151    | ferredoxin : chlorosome envelope protein J                                                                                |
| 166097866 <sub>a</sub> | 0.00589 | COG0459 | K04077 | Acid345_1097 | chaperonin GroEL (HSP60 family)                                                                                           |
| 166097888              | 0.00584 | COG0191 | K01624 | Cvib_0892    | fructose/tagatose bisphosphate aldolase                                                                                   |
| 166157335              | 0.00575 | COG0450 | K03386 | Cvib_1195    | peroxiredoxin                                                                                                             |
| 166112774              | 0.00570 | COG0191 | K01624 | Cvib_0892    | fructose/tagatose bisphosphate aldolase                                                                                   |
| 166114562              | 0.00568 | COG0224 | K02115 | Cvib_1627    | F0F1-type ATP synthase gamma subunit                                                                                      |
| 166073786              | 0.00553 | COG0045 | K01903 | Cvib_0553    | succinyl-CoA synthetase beta subunit                                                                                      |
| 166094904              | 0.00543 | COG0330 |        | Cvib_1667    | membrane protease subunits, stomatin/prohibitin homologs : SPFH domain, band 7 family protein                             |
| 166105507              | 0.00538 | COG1290 | K00412 | Cvib_1500    | cytochrome b subunit of the bc complex : ubiquinol-cytochrome c reductase cytochrome b subunit                            |
| 166073832              | 0.00525 | COG0359 | K02939 | Cvib_0184    | rplI; 50S ribosomal protein L9                                                                                            |
| 166145084              | 0.00522 | COG0094 | K02931 | Cvib_0258    | rplE; 50S ribosomal protein L5                                                                                            |
| 166107961              | 0.00493 | COG0674 | K03737 | Cvib_1407    | pyruvate:ferredoxin oxidoreductase and related 2-oxoacid:ferredoxin oxidoreductases, alpha subunit                        |
| 166118279              | 0.00485 | COG0081 | K02863 | Cvib_1608    | rplA; 50S ribosomal protein L1                                                                                            |

|                        |         |         |        |           |                                                                                                                                                                        |
|------------------------|---------|---------|--------|-----------|------------------------------------------------------------------------------------------------------------------------------------------------------------------------|
| 166102730              | 0.00462 | COG0776 | K03530 | ECA1151   | bacterial nucleoid DNA-binding protein : hupB, hopD;<br>transcriptional regulator HU subunit beta                                                                      |
| 166081105              | 0.00459 | COG0674 | K00174 | Cvib_1597 | pyruvate:ferredoxin oxidoreductase and related 2-<br>oxoacid:ferredoxin oxidoreductases, alpha subunit :<br>2-oxoglutarate ferredoxin oxidoreductase, alpha<br>subunit |
| 166176327 <sub>b</sub> | 0.00459 | COG0050 | K02358 | Cvib_0244 | GTPases - translation elongation factors : tuf                                                                                                                         |
| 166154349              | 0.00458 | COG0776 | K03530 | Maqu_1837 | bacterial nucleoid DNA-binding protein : DNA-binding<br>protein HU-beta                                                                                                |
| 166147144              | 0.00453 | COG0522 | K02986 | Cvib_0272 | rpsD; 30S ribosomal protein S4                                                                                                                                         |
| 166171164              | 0.00439 | COG1038 | K01571 | Cvib_1018 | pyruvate carboxylase, C-terminal domain/subunit :<br>biotin/lipoyl attachment domain-containing protein;<br>oxaloacetate decarboxylase, alpha subunit                  |
| 166161092              | 0.00429 | COG0074 | K01902 | Cvib_1529 | succinyl-CoA synthetase alpha subunit                                                                                                                                  |
| 166169642              | 0.00428 | COG0003 | K01551 | Cvib_0783 | predicted ATPase involved in chromosome<br>partitioning : arsenite-activated ATPase ArsA                                                                               |
| 166129916              | 0.00422 | COG1185 | K00962 | Cvib_1424 | polyribonucleotide nucleotidyltransferase<br>(polynucleotide phosphorylase)                                                                                            |
| 166145082              | 0.00408 | COG0094 | K02931 | Cvib_0258 | rplE; 50S ribosomal protein L5                                                                                                                                         |
| 166129918              | 0.00407 | COG1185 | K00962 | Cvib_1424 | polyribonucleotide nucleotidyltransferase<br>(polynucleotide phosphorylase)                                                                                            |
| 166175528              | 0.00404 | COG0261 | K02888 | Cvib_1329 | rplU; 50S ribosomal protein L21                                                                                                                                        |
| 166116994              | 0.00393 | COG1274 | K01596 | Cvib_0027 | phosphoenolpyruvate carboxykinase (GTP)                                                                                                                                |
| 166102162              | 0.00393 | COG0330 |        | Plut_1305 | membrane protease subunits, stomatin/prohibitin<br>homologs : band 7 protein                                                                                           |
| 166112188              | 0.00388 | COG1049 | K01682 | Cvib_0598 | aconitase B : bifunctional aconitate hydratase 2/2-<br>methylisocitrate dehydratase                                                                                    |
| 166098678              | 0.00381 | COG0443 | K04043 | Cvib_1158 | molecular chaperone : DnaK                                                                                                                                             |
| 166168134              | 0.00358 | COG0052 | K02967 | Cvib_0458 | rpsB; 30S ribosomal protein S2; K02967 small subunit<br>ribosomal protein S2                                                                                           |

|                        |         |         |        |           |                                                                                                    |
|------------------------|---------|---------|--------|-----------|----------------------------------------------------------------------------------------------------|
| 166074098              | 0.00356 | COG0233 | K02838 | Cvib_0408 | ribosome recycling factor                                                                          |
| 166169194              | 0.00350 | COG0001 | K01845 | Cvib_1681 | glutamate-1-semialdehyde 2,1-aminomutase                                                           |
| 166125344              | 0.00346 | COG0174 | K01915 | Cvib_1230 | glutamine synthetase                                                                               |
| 166137459              | 0.00346 | COG0335 | K02884 | Cvib_0932 | rplS; 50S ribosomal protein L19                                                                    |
| 166118281              | 0.00345 | COG0244 | K02864 | Cvib_1607 | rplJ; 50S ribosomal protein L10                                                                    |
| 166145072              | 0.00342 | COG0098 | K02988 | Cvib_0263 | rpsE; 30S ribosomal protein S5                                                                     |
| 166166464 <sub>c</sub> | 0.00335 | COG0057 | K00134 | Cvib_1310 | glyceraldehyde-3-phosphate dehydrogenase/erythrose-4-phosphate dehydrogenase                       |
| 166077950              | 0.00311 | COG0039 | K00026 | Cvib_1331 | malate/lactate dehydrogenases                                                                      |
| 166175692              | 0.00303 | COG1378 |        | NEQ098    | predicted transcriptional regulators : hypothetical protein                                        |
| 166145074              | 0.00301 | COG0256 | K02881 | Cvib_0262 | rplR; 50S ribosomal protein L18                                                                    |
| 166145070              | 0.00294 | COG0200 | K02876 | Cvib_0265 | rplO; 50S ribosomal protein L15                                                                    |
| 166145094              | 0.00270 | COG0197 | K02878 | Cvib_0253 | rplP; 50S ribosomal protein L16                                                                    |
| 166188981              | 0.00259 | COG0234 | K04078 | Plut_0541 | Co-chaperonin GroES (HSP10)                                                                        |
| 166193190              | 0.00256 | COG1049 | K01682 | Cvib_0598 | aconitase B : bifunctional aconitate hydratase 2/2-methylisocitrate dehydratase                    |
| 166170748              | 0.00252 | COG0115 | K00826 | Cvib_1391 | branched-chain amino acid aminotransferase/4-amino-4-deoxychorismate lyase                         |
| 166166696              | 0.00245 | COG0085 | K03043 | Cvib_1605 | DNA-directed RNA polymerase beta subunit/140 kD subunit (split gene in Mjan, Mthe, Aful)           |
| 166177107              | 0.00243 | COG0652 | K03767 | Cvib_0535 | peptidyl-prolyl cis-trans isomerase (rotamase) - cyclophilin family                                |
| 166185496              | 0.00241 | COG0588 | K01834 | Cvib_0557 | phosphoglycerate mutase 1                                                                          |
| 166083171              | 0.00234 | COG0192 | K00789 | Cvib_1121 | S-adenosylmethionine synthetase                                                                    |
| 166086944              | 0.00222 | COG1014 | K03737 | Cvib_1407 | pyruvate:ferredoxin oxidoreductase and related 2-oxoacid:ferredoxin oxidoreductases, gamma subunit |
| 166154673              | 0.00220 | COG0629 | K03111 | Cvib_0326 | single-strand binding protein                                                                      |



|                        |         |         |        |           |                                                                                          |
|------------------------|---------|---------|--------|-----------|------------------------------------------------------------------------------------------|
| 166176323              | 0.00216 | COG0480 | K02355 | Cvib_0243 | translation elongation and release factors (GTPases) : fusA; elongation factor G         |
| 166136530              | 0.00213 | COG0711 | K02109 | Cvib_1741 | FOF1-type ATP synthase b subunit                                                         |
| 166176321              | 0.00213 | COG0049 | K02992 | Cvib_0242 | 30S ribosomal protein S7                                                                 |
| 166145098              | 0.00203 | COG0091 | K02890 | Cvib_0251 | rplV; 50S ribosomal protein L22                                                          |
| 166090169 <sub>a</sub> | 0.00200 | COG0459 | K04077 | Oter_2054 | chaperonin GroEL (HSP60 family)                                                          |
| 166087916              | 0.00197 | COG0462 | K00948 | Cvib_0712 | phosphoribosylpyrophosphate synthetase                                                   |
| 166177021              | 0.00192 | COG0001 | K01845 | Cvib_1681 | glutamate-1-semialdehyde 2,1-aminomutase                                                 |
| 166152385              | 0.00189 | COG0086 | K03046 | Cvib_1604 | DNA-directed RNA polymerase beta' subunit/160 kD subunit (split gene in archaea and Syn) |
| 166145088              | 0.00188 | COG0093 | K02874 | Cvib_0256 | rplN; 50S ribosomal protein L14                                                          |
| 166190942              | 0.00188 | COG0085 | K03043 | Cvib_1605 | DNA-directed RNA polymerase beta subunit/140 kD subunit (split gene in Mjan, Mthe, Aful) |
| 166118275              | 0.00187 | COG0250 | K02601 | Cvib_1610 | transcription antitermination protein NusG                                               |
| 166145096              | 0.00183 | COG0092 | K02982 | Cvib_0252 | rpsC; 30S ribosomal protein S3                                                           |
| 166091362              | 0.00181 | COG2319 |        | Cvib_0309 | WD-40 repeat protein                                                                     |
| 166124685              | 0.00181 | COG0176 | K00616 | Cvib_1728 | transaldolase                                                                            |
| 166135982              | 0.00177 | COG0126 | K00927 | Cvib_1766 | pgk; phosphoglycerate kinase                                                             |
| 166164640              | 0.00175 | COG1729 |        | Cvib_1161 | uncharacterized BCR : tetratricopeptide domain protein                                   |
| 166087918              | 0.00167 | COG1825 | K02897 | Cvib_0711 | 50S ribosomal protein L25/general stress protein Ctc                                     |
| 166189760              | 0.00167 | COG0148 | K01689 | Cvib_1615 | enolase                                                                                  |
| 166102164              | 0.00157 | COG0589 |        | Cvib_1041 | universal stress protein UspA and related nucleotide-binding proteins                    |
| 166154669              | 0.00154 | COG0003 | K01551 | Cvib_0328 | predicted ATPase involved in chromosome partitioning : arsenite-activated ATPase ArsA    |
| 166131420              | 0.00154 | COG1611 | K06966 | Cvib_0416 | predicted Rossmann fold nucleotide-binding protein : conserved hypothetical protein 730  |
| 166103031              | 0.00153 | COG0724 |        | Cag_1551  | RNA-binding proteins (RRM domain) : RNP-1 (RNA recognition motif)                        |

|           |         |         |        |              |                                                                                                                                                           |
|-----------|---------|---------|--------|--------------|-----------------------------------------------------------------------------------------------------------------------------------------------------------|
| 166145110 | 0.00150 | COG0087 | K02906 | Cvib_0246    | rplC; 50S ribosomal protein L3                                                                                                                            |
| 166143572 | 0.00147 | COG0103 | K02996 | Cvib_0457    | rpsI; 30S ribosomal protein S9                                                                                                                            |
| 166081107 | 0.00142 | COG1013 | K00175 | Cvib_1598    | pyruvate:ferredoxin oxidoreductase and related 2-oxoacid:ferredoxin oxidoreductases, beta subunit : 2-oxoglutarate ferredoxin oxidoreductase subunit beta |
| 166119893 | 0.00140 | COG0113 | K01698 | Cvib_1252    | delta-aminolevulinic acid dehydratase : porphobilinogen synthase                                                                                          |
| 166145108 | 0.00135 | COG0088 | K02926 | Cvib_0247    | rplD; 50S ribosomal protein L4                                                                                                                            |
| 166091020 | 0.00135 | COG0112 | K00600 | Cvib_1381    | glycine hydroxymethyltransferase                                                                                                                          |
| 166125448 | 0.00133 | COG1239 | K03405 | Cvib_1059    | Mg-chelatase subunit ChII                                                                                                                                 |
| 166079276 | 0.00131 | COG0499 | K01251 | Cvib_1122    | S-adenosyl-L-homocysteine hydrolase                                                                                                                       |
| 166145076 | 0.00128 | COG0097 | K02933 | Cvib_0261    | rplF; 50S ribosomal protein L6                                                                                                                            |
| 166145078 | 0.00127 | COG0096 | K02994 | Cvib_0260    | rpsH; 30S ribosomal protein S8                                                                                                                            |
| 166102716 | 0.00125 | COG0446 | K00540 | Cpha266_2569 | uncharacterized NAD(FAD)-dependent dehydrogenases : sulfide-quinone reductase                                                                             |
| 166176319 | 0.00124 | COG0048 | K02950 | Cvib_0241    | rpsL; 30S ribosomal protein S12                                                                                                                           |
| 166079074 | 0.00122 | COG1049 | K01682 | Cvib_0598    | aconitase B : bifunctional aconitate hydratase 2/2-methylisocitrate dehydratase                                                                           |
| 166111074 | 0.00118 | COG0539 | K02945 | Cvib_1514    | rpsA; 30S ribosomal protein S1                                                                                                                            |
| 166136657 | 0.00118 | COG1360 | K02557 | Pcar_1973    | flagellar motor protein : chemotaxis protein MotB                                                                                                         |
| 166124033 | 0.00118 | COG0158 | K03841 | Cvib_0509    | fructose-1,6-bisphosphatase                                                                                                                               |
| 166176325 | 0.00117 | COG0480 | K02355 | Plut_0177    | translation elongation and release factors (GTPases) : fusA; elongation factor G                                                                          |
| 166137753 | 0.00115 | COG1778 | K03270 | Cvib_1694    | uncharacterized proteins of HAD superfamily, CMP-Neu5Ac homologs : 3-deoxy-D-manno-octulosonate 8-phosphate phosphatase, YrbI family                      |
| 166125498 | 0.00112 | COG0377 | K00331 | Cvib_1092    | NADH:ubiquinone oxidoreductase 20 kD subunit and related Fe-S oxidoreductases                                                                             |
| 166144212 | 0.00110 | COG2101 | K03120 | AF0373       | transcription initiation factor TFIID (TATA-binding protein)                                                                                              |

|            |         |         |        |           |                                                                                                                                         |
|------------|---------|---------|--------|-----------|-----------------------------------------------------------------------------------------------------------------------------------------|
| 166171940  | 0.00110 | COG0100 | K02948 | Cvib_0271 | 30S ribosomal protein S11                                                                                                               |
| 166195033  | 0.00109 | COG0809 | K07568 | Cvib_1048 | S-adenosylmethionine:tRNA-ribosyltransferase-isomerase (queuine synthetase)                                                             |
| 166186408  | 0.00109 | COG0365 | K01895 | Plut_1637 | acyl-coenzyme A synthetases/AMP-(fatty) acid ligases                                                                                    |
| 166177113  | 0.00106 | COG0005 | K03783 | Cvib_0533 | purine nucleoside phosphorylase                                                                                                         |
| 166154527  | 0.00105 | COG0413 | K00606 | Cvib_0725 | ketopantoate hydroxymethyltransferase : panB; 3-methyl-2-oxobutanoate hydroxymethyltransferase                                          |
| 166150004  | 0.00105 | COG1028 |        | Cvib_0372 | dehydrogenases with different specificities (related to short-chain alcohol dehydrogenases)                                             |
| 166187454  | 0.00104 | COG0059 | K00053 | Cvib_1172 | ketol-acid reductoisomerase                                                                                                             |
| 166112410* | 0.00100 | COG0086 | K03046 | HM1_1371  | DNA-directed RNA polymerase beta' subunit/160 kD subunit (split gene in archaea and Syn)                                                |
| 166118285  | 0.00099 | COG0085 | K03043 | Cvib_1605 | DNA-directed RNA polymerase beta subunit/140 kD subunit (split gene in Mjan, Mthe, Aful)                                                |
| 166147142  | 0.00098 | COG0202 | K03040 | Cvib_0273 | DNA-directed RNA polymerase alpha subunit/40 kD subunit                                                                                 |
| 166091254  | 0.00097 | COG1587 | K01719 | Cvib_1246 | uroporphyrinogen-III synthase                                                                                                           |
| 166123058  | 0.00096 | COG1028 | K00059 | Cvib_1180 | dehydrogenases with different specificities (related to short-chain alcohol dehydrogenases): 3-oxoacyl-[acyl-carrier protein] reductase |
| 166083688  | 0.00096 | COG0330 | K04088 | Pcar_2262 | membrane protease subunits, stomatin/prohibitin homologsh: HflK                                                                         |
| 166081389  | 0.00095 | COG0241 | K05602 | Cvib_0287 | histidinol phosphatase and related phosphatases                                                                                         |
| 166104095  | 0.00094 | COG1837 | K06960 | CAC1756   | predicted RNA-binding protein (KH domain)                                                                                               |
| 166137513  | 0.00094 | COG0725 | K02020 | Cvib_1492 | ABC-type molybdate transport system, periplasmic component                                                                              |
| 166073556  | 0.00093 | COG0592 | K02338 | Cvib_0002 | DNA polymerase sliding clamp subunit (PCNA homolog)                                                                                     |
| 166085896  | 0.00092 | COG0086 | K03046 | Cvib_1604 | DNA-directed RNA polymerase beta' subunit/160 kD subunit (split gene in archaea and Syn)                                                |

|                        |         |         |        |             |                                                                                                                     |
|------------------------|---------|---------|--------|-------------|---------------------------------------------------------------------------------------------------------------------|
| 166171160              | 0.00092 | COG0511 | K01571 | Cvib_1018   | biotin carboxyl carrier protein : oxaloacetate decarboxylase, alpha subunit                                         |
| 166143662              | 0.00089 | COG0289 | K00215 | Cvib_0390   | dihydrodipicolinate reductase                                                                                       |
| 166128308              | 0.00082 | COG2873 | K01740 | Cag_1257    | O-acetylhomoserine/O-acetylserine sulfhydrylase                                                                     |
| 166096460              | 0.00082 | COG1561 |        | Cvib_1556   | uncharacterized stress-induced protein                                                                              |
| 166174470              | 0.00080 | COG3040 | K03098 | Cvib_0516   | bacterial lipocalin : Blc                                                                                           |
| 166142836              | 0.00079 | COG0480 | K02355 | Cvib_1616   | translation elongation and release factors (GTPases) : fusA; elongation factor G                                    |
| 166198126              | 0.00078 | COG0326 | K04079 | Cvib_1024   | molecular chaperone, HSP90 family : HtpG                                                                            |
| 166187456              | 0.00077 | COG0440 | K01653 | Cvib_1171   | acetolactate synthase, small subunit                                                                                |
| 166195031              | 0.00076 | COG1554 |        | Cvib_1047   | trehalose and maltose hydrolases (possible phosphorylases) : beta-phosphoglucomutase family hydrolase               |
| 166112772              | 0.00076 | COG0191 | K01624 | Cvib_0892   | fructose/tagatose biphosphate aldolase                                                                              |
| 166167622              | 0.00075 | COG0499 | K01251 | Cvib_1122   | S-adenosyl-L-homocysteine hydrolase                                                                                 |
| 166163472              | 0.00074 | COG3637 |        | Cvib_1533   | opacity protein and related surface antigens : porin, opacity type                                                  |
| 166186410              | 0.00070 | COG0365 | K01895 | Cvib_1426   | acyl-coenzyme A synthetases/AMP-(fatty) acid ligases                                                                |
| 166137755              | 0.00069 | COG2877 | K01627 | Cvib_1695   | 3-Deoxy-D-manno-octulosonic acid (KDO) 8-phosphate synthase : 2-dehydro-3-deoxyphosphooctonate aldolase             |
| 166109758              | 0.00069 | COG2171 | K00674 | Cvib_0017   | tetrahydrodipicolinate N-succinyltransferase : dapD; 2,3,4,5-tetrahydropyridine-2-carboxylate N-succinyltransferase |
| 166164026              | 0.00068 | COG3808 | K01507 | Cvib_0758   | inorganic pyrophosphatase : hppA                                                                                    |
| 166139077              | 0.00068 | COG1837 | K06960 | Bcer98_2495 | predicted RNA-binding protein (KH domain)                                                                           |
| 166087626 <sub>c</sub> | 0.00067 | COG0057 | K00134 | Bcer98_3682 | glyceraldehyde-3-phosphate dehydrogenase/erythrose-4-phosphate dehydrogenase                                        |
| 166134708              | 0.00066 | COG0760 |        | Cvib_1572   | parvulin-like peptidyl-prolyl isomerase : PpiC-type peptidyl-prolyl cis-trans isomerase                             |

|                        |         |         |        |           |                                                                                                                |
|------------------------|---------|---------|--------|-----------|----------------------------------------------------------------------------------------------------------------|
| 166150020              | 0.00066 | COG2606 |        | Cvib_0364 | uncharacterized ACR : YbaK/prolyl-tRNA synthetase associated region                                            |
| 166179493              | 0.00066 | COG0058 | K00688 | Cvib_1386 | alpha-glucan phosphorylase; starch phosphorylase                                                               |
| 166164028              | 0.00063 | COG3808 | K01507 | Plut_1202 | inorganic pyrophosphatase : hppA                                                                               |
| 166083948              | 0.00063 | COG0173 | K01876 | Cvib_1052 | aspS; aspartyl-tRNA synthetase                                                                                 |
| 166090630              | 0.00063 | COG1252 | K03885 | Cvib_1373 | NADH dehydrogenase, FAD-containing subunit : FAD-dependent pyridine nucleotide-disulphide oxidoreductase       |
| 166150732              | 0.00063 | COG0407 | K01599 | Cvib_1635 | uroporphyrinogen-III decarboxylase                                                                             |
| 166134876              | 0.00060 | COG0195 | K02600 | Cvib_1562 | transcription elongation factor NusA : N utilization substance protein A                                       |
| 166151470 <sub>b</sub> | 0.00057 | COG0050 | K02358 | Nwi_1362  | GTPases - translation elongation factors : tuf                                                                 |
| 166180979              | 0.00056 | COG3245 |        | Cvib_0219 | cytochrome c5                                                                                                  |
| 166110008              | 0.00055 | COG1429 | K03403 | Cvib_1057 | cobalamin biosynthesis protein CobN and related Mg-chelataes : hydrogenobyric acid a,c-diamide cobaltochelatae |
| 166093481              | 0.00054 | COG0260 | K01255 | Cvib_0947 | leucyl aminopeptidase                                                                                          |
| 166084291              | 0.00053 | COG3360 | K09165 | Cvib_0029 | uncharacterized ACR : protein of unknown function DUF1458                                                      |
| 166134544              | 0.00053 | COG2920 | K00396 | Cvib_0038 | sulfite reductase, gamma subunit : DsrC family protein                                                         |
| 166183160              | 0.00052 | COG1077 | K03569 | Cvib_0595 | HSP70 class molecular chaperones involved in cell morphogenesis: MreB/Mrl family                               |
| 166079969              | 0.00052 | COG0539 | K02945 | Cvib_1514 | rpsA; 30S ribosomal protein S1                                                                                 |
| 166074910              | 0.00051 | COG0003 | K01551 | Cvib_0332 | predicted ATPase involved in chromosome partitioning : arsenite-activated ATPase ArsA                          |
| 166078208              | 0.00049 | COG1032 | K04035 | Cvib_0316 | Fe-S oxidoreductases family 2 : magnesium-protoporphyrin IX monomethyl ester anaerobic oxidative cyclase       |
| 166148744              | 0.00048 | COG0217 |        | Cvib_1432 | uncharacterized ACR : hypothetical protein                                                                     |

|                        |         |         |        |           |                                                                                                                                                   |
|------------------------|---------|---------|--------|-----------|---------------------------------------------------------------------------------------------------------------------------------------------------|
| 166164642              | 0.00047 | COG2885 |        | Cvib_1162 | outer membrane protein and related peptidoglycan-associated (lipo)proteins : OmpA/MotB domain protein                                             |
| 166124690              | 0.00046 | COG1899 | K00809 | Cvib_1729 | deoxyhypusine synthase                                                                                                                            |
| 166074701              | 0.00046 | COG0360 | K02990 | Cvib_0181 | rpsF; 30S ribosomal protein S6                                                                                                                    |
| 166078272              | 0.00044 | COG0811 | K03562 | Cvib_1167 | biopolymer transport proteins : MotA/TolQ/ExbB proton channel                                                                                     |
| 166160978              | 0.00044 | COG2077 | K00435 | Cvib_1103 | Peroxiredoxin : thiol peroxidase (atypical 2-Cys peroxiredoxin)                                                                                   |
| 166089421              | 0.00042 | COG0330 |        | SYN_00180 | membrane protease subunits, stomatin/prohibitin homologs : bacterial HflC protein                                                                 |
| 166184106              | 0.00041 | COG1351 | K03465 | Plut_0366 | predicted alternative thymidylate synthase : thyX                                                                                                 |
| 166146666              | 0.00040 | COG1538 |        | Plut_2001 | outer membrane protein : LipD protein, putative                                                                                                   |
| 166107875 <sub>b</sub> | 0.00039 | COG0050 | K02358 | Pcar_0699 | GTPases - translation elongation factors : tufA, tuf                                                                                              |
| 166185036              | 0.00038 | COG0436 | K00812 | Cvib_0768 | PLP-dependent aminotransferases : aspartate aminotransferase                                                                                      |
| 166085075              | 0.00038 | COG0694 | K07400 | Cvib_0453 | thioredoxin-like proteins and domains : nitrogen-fixing NifU domain protein                                                                       |
| 166166220              | 0.00038 | COG0330 | K04087 | Pcar_2263 | membrane protease subunits, stomatin/prohibitin homologsh: HflC protein                                                                           |
| 166156045              | 0.00037 | COG3155 |        | Cvib_1447 | uncharacterized sigma cross-reacting protein 27A (ES1 or KNP-I alpha protein) : isoprenoid biosynthesis protein with amidotransferase-like domain |
| 166197986              | 0.00034 | COG0342 | K03072 | Cvib_0010 | preprotein translocase subunit SecD                                                                                                               |
| 166147140              | 0.00034 | COG0203 | K02879 | Cvib_0274 | rplQ; 50S ribosomal protein L17                                                                                                                   |
| 166073820              | 0.00033 | COG0188 | K02469 | Cvib_0172 | DNA gyrase (topoisomerase II) A subunit                                                                                                           |
| 166181669              | 0.00033 | COG0082 | K01736 | Cvib_1253 | chorismate synthase                                                                                                                               |
| 166159821              | 0.00033 | COG2884 | K09812 | Cvib_1198 | predicted ATPase involved in cell division : FtsE                                                                                                 |
| 166145122              | 0.00031 | COG3347 |        | Cvib_0462 | uncharacterized ACR : short chain dehydrogenase                                                                                                   |
| 166081203              | 0.00030 | COG0468 | K03553 | Cvib_0340 | RecA/RadA recombinase                                                                                                                             |

|                        |         |         |        |           |                                                                                                                 |
|------------------------|---------|---------|--------|-----------|-----------------------------------------------------------------------------------------------------------------|
| 166160944              | 0.00029 | COG0226 | K02040 | Cvib_0998 | ABC-type phosphate transport system, periplasmic component                                                      |
| 166171936              | 0.00029 | COG0024 | K01265 | Cvib_0267 | methionine aminopeptidase                                                                                       |
| 166177115              | 0.00028 | COG0182 | K08963 | Cvib_0532 | translation initiation factor eIF-2B alpha subunit : methylthioribose-1-phosphate isomerase                     |
| 166121954              | 0.00027 | COG1239 | K03404 | Cvib_1058 | Mg-chelatase subunit ChII                                                                                       |
| 166114512              | 0.00027 | COG0729 | K07277 | Cvib_1532 | predicted outer membrane protein : surface antigen (D15)                                                        |
| 166123620 <sub>a</sub> | 0.00026 | COG0459 | K04077 | MXAN_4895 | chaperonin GroEL (HSP60 family)                                                                                 |
| 166160942              | 0.00025 | COG0226 | K02040 | Cvib_0997 | ABC-type phosphate transport system, periplasmic component                                                      |
| 166080265              | 0.00024 | COG2878 |        | Cvib_0798 | predicted alternative beta subunit of Na <sup>+</sup> -transporting NADH:ubiquinone oxidoreductase : ferredoxin |
| 166184114              | 0.00023 | COG0568 | K03086 | Cvib_0443 | DNA-directed RNA polymerase sigma subunits (sigma70/sigma32)                                                    |
| 166163480              | 0.00023 | COG1158 | K03628 | Cvib_1537 | transcription termination factor: Rho                                                                           |
| 166132366              | 0.00023 | COG1233 |        | Cvib_0356 | phytoene dehydrogenase and related proteins : FAD dependent oxidoreductase                                      |
| 166116816              | 0.00021 | COG0542 | K03696 | Cvib_1580 | ATPases with chaperone activity, ATP-binding subunit : ATP-dependent Clp protease ATP-binding subunit ClpC      |
| 166128316              | 0.00020 | COG1629 |        | Cvib_1353 | outer membrane receptor proteins, mostly Fe transport : TonB receptor family                                    |
| 166163448              | 0.00020 | COG0635 | K02495 | Cvib_1370 | coproporphyrinogen III oxidase and related Fe-S oxidoreductases                                                 |
| 166159573              | 0.00019 | COG1151 | K00378 | Cvib_1455 | 6Fe-6S prismane cluster-containing protein : hydroxylamine reductase                                            |
| 166163870              | 0.00017 | COG0209 | K00525 | Cvib_1199 | ribonucleotide-diphosphate reductase subunit alpha                                                              |
| 166135202              | 0.00013 | COG0544 | K03545 | Cvib_0337 | FKBP-type peptidyl-prolyl cis-trans isomerase (trigger factor)                                                  |

| 166164774                                    | 0.00012                              | COG0743              | K00099               | Cvib_0138                  | 1-deoxy-D-xylulose 5-phosphate reductoisomerase                                                                   |
|----------------------------------------------|--------------------------------------|----------------------|----------------------|----------------------------|-------------------------------------------------------------------------------------------------------------------|
| 166180975                                    | 0.00012                              | COG0075              | K00839               | Cvib_0221                  | serine-pyruvate aminotransferase/archaeal aspartate aminotransferase                                              |
| 166078200                                    | 0.00011                              | COG1429              | K06050               | Cvib_0320                  | cobalamin biosynthesis protein CobN and related Mg-chelatases : hydrogenobyric acid a,c-diamide cobaltochelataase |
| 166185488                                    | 0.00010                              | COG0069              | K00284               | Cvib_0558                  | glutamate synthase domain 2                                                                                       |
| <b>14 m - KEGG and NR annotated proteins</b> |                                      |                      |                      |                            |                                                                                                                   |
| <b>Gene ID</b>                               | <b>normalised spectral abundance</b> | <b>NR identifier</b> | <b>KO identifier</b> | <b>KEGG / NR locus tag</b> | <b>KEGG/NR description</b>                                                                                        |
| 166154667                                    | 0.12890                              |                      | K08947               | Cvib_0329                  | chlorosome envelope protein C                                                                                     |
| 166116826                                    | 0.07870                              |                      | K08944               | Cvib_1325                  | bacteriochlorophyll A protein                                                                                     |
| 166103043                                    | 0.07473                              |                      |                      | Cpha266_0714               | hypothetical protein                                                                                              |
| 166154665                                    | 0.04995                              |                      | K08945               | Cvib_0330                  | bacteriochlorophyll C binding protein                                                                             |
| 166084321                                    | 0.01855                              |                      | K08951               | Cvib_1234                  | chlorosome envelope protein H                                                                                     |
| 166197596                                    | 0.01757                              |                      |                      | Cvib_0837                  | hypothetical protein                                                                                              |
| 166078646                                    | 0.01703                              |                      | K06142               | Cvib_1549                  | outer membrane chaperone Skp (OmpH)                                                                               |
| 166183346                                    | 0.01613                              |                      |                      | CKO_01864                  | hypothetical protein                                                                                              |
| 166103041                                    | 0.01438                              |                      |                      | Cpha266_0714               | hypothetical protein                                                                                              |
| 166128026                                    | 0.01374                              |                      | K08943               | Cvib_1159                  | photosystem P840 reaction center protein PscD; K08943 photosystem P840 reaction center protein PscD               |
| 166178625                                    | 0.01011                              |                      |                      | Plut_1996                  | CBS                                                                                                               |
| 166169946                                    | 0.00965                              |                      |                      | Psyr_2789                  | hypothetical protein                                                                                              |
| 166128030                                    | 0.00924                              |                      | K08943               | Cvib_1159                  | photosystem P840 reaction center protein PscD                                                                     |
| 166105997                                    | 0.00871                              | ZP_02034709          |                      | BACCAP_00296               | hypothetical protein [Bacteroides capillosus ATCC 29799]                                                          |
| 166112572                                    | 0.00846                              |                      |                      | Daci_1946                  | putative phage major head protein                                                                                 |
| 166160856                                    | 0.00694                              | ZP_03762235          |                      | CLOSTASPAR_06273           | hypothetical protein [Clostridium asparagiforme DSM 15981]                                                        |



|                        |         |  |        |               |                                                                                                             |
|------------------------|---------|--|--------|---------------|-------------------------------------------------------------------------------------------------------------|
| 166112574 <sub>d</sub> | 0.00672 |  |        | Daci_1946     | putative phage major head protein                                                                           |
| 166114838              | 0.00665 |  |        | Cvib_0125     | hypothetical protein                                                                                        |
| 166191606              | 0.00636 |  | K08940 | Cvib_1619     | photosystem P840 reaction center, large subunit;<br>K08940 photosystem P840 reaction center large subunit   |
| 166147050              | 0.00612 |  |        | Plut_1061     | citrate lyase, subunit 1                                                                                    |
| 166145430 <sub>e</sub> | 0.00533 |  |        | Haur_0657     | hypothetical protein                                                                                        |
| 166076418              | 0.00499 |  |        | Daci_1946     | putative phage major head protein                                                                           |
| 166198192 <sub>e</sub> | 0.00493 |  |        | Haur_0657     | hypothetical protein                                                                                        |
| 166177839              | 0.00469 |  |        | Bcep1808_1173 | hypothetical protein                                                                                        |
| 166150012              | 0.00390 |  | K08946 | Cvib_0367     | chlorosome envelope protein B;                                                                              |
| 166199138              | 0.00360 |  | K08942 | Cvib_1418     | photosystem P840 reaction center cytochrome c-551                                                           |
| 166145106              | 0.00354 |  | K02926 | Cvib_0247     | rplD; 50S ribosomal protein L4                                                                              |
| 166115656              | 0.00353 |  |        | Cag_0645      | hypothetical protein                                                                                        |
| 166171962              | 0.00347 |  |        | BC1894        | phage protein                                                                                               |
| 166191394              | 0.00334 |  |        | Cvib_0413     | hypothetical protein                                                                                        |
| 166075542              | 0.00331 |  |        | Cvib_1747     | O-methyltransferase, family 2                                                                               |
| 166195894              | 0.00312 |  |        | CKL_1862      | hypothetical protein                                                                                        |
| 166194857              | 0.00290 |  | K08941 | Cvib_1618     | 4Fe-4S ferredoxin, iron-sulfur binding domain protein; photosystem P840 reaction center iron-sulfur protein |
| 166111558              | 0.00220 |  |        | Cvib_1311     | hypothetical protein                                                                                        |
| 166177105              | 0.00197 |  |        | Cvib_0536     | TPR repeat-containing protein                                                                               |
| 166147988 <sub>d</sub> | 0.00160 |  |        | Daci_1946     | putative phage major head protein                                                                           |
| 166143915              | 0.00156 |  |        | GDI3673       | hypothetical protein                                                                                        |
| 166114744              | 0.00144 |  |        | Cvib_0488     | mammalian cell entry related domain protein                                                                 |
| 166136528              | 0.00134 |  | K05807 | Cvib_1734     | putative lipoprotein                                                                                        |
| 166189288              | 0.00132 |  | K08946 | Cvib_1647     | chlorosome envelope protein B                                                                               |
| 166153135              | 0.00118 |  |        | Cvib_1720     | hypothetical protein                                                                                        |
| 166115588              | 0.00099 |  |        | Aave_2895     | hypothetical protein                                                                                        |

|                                           |         |  |        |                |                                         |
|-------------------------------------------|---------|--|--------|----------------|-----------------------------------------|
| 166126712                                 | 0.00099 |  |        | Cphamn1_2160   | CRISPR-associated protein, CSE2 family  |
| 166127542                                 | 0.00096 |  |        | Cphamn1_0811   | hypothetical protein                    |
| 166085087                                 | 0.00091 |  |        | Swit_4452      | hypothetical protein                    |
| 166129356                                 | 0.00081 |  |        | Cvib_0992      | phosphate uptake regulator, PhoU        |
| 166195535                                 | 0.00080 |  |        | Cthe_1719      | phage major capsid protein, HK97 family |
| 166080497                                 | 0.00077 |  |        | NEQ258         | hypothetical protein                    |
| 166126708                                 | 0.00075 |  |        | CT1975         | hypothetical protein                    |
| 166148084                                 | 0.00075 |  |        | Cvib_0912      | hypothetical protein                    |
| 166093483                                 | 0.00074 |  | K01255 | Cvib_0947      | leucyl aminopeptidase                   |
| 166170746                                 | 0.00073 |  | K00850 | Cvib_1390      | 6-phosphofructokinase                   |
| 166140451                                 | 0.00071 |  |        | amb4267        | hypothetical protein                    |
| 166097432                                 | 0.00047 |  |        | GbCGDNIH1_1574 | hypothetical protein                    |
| 166135078                                 | 0.00039 |  |        | Cvib_1499      | alpha amylase, catalytic region         |
| 166091036                                 | 0.00024 |  |        | Cvib_0951      | hypothetical protein                    |
| <b>14 m - Proteins with no annotation</b> |         |  |        |                |                                         |
| 166113938                                 | 0.28150 |  |        |                |                                         |
| 166170056 <sub>f</sub>                    | 0.23381 |  |        |                |                                         |
| 166104559                                 | 0.21346 |  |        |                |                                         |
| 166166078                                 | 0.11573 |  |        |                |                                         |
| 166119911 <sub>g</sub>                    | 0.10078 |  |        |                |                                         |
| 166141831                                 | 0.09127 |  |        |                |                                         |
| 166155401                                 | 0.06411 |  |        |                |                                         |
| 166178565 <sub>f</sub>                    | 0.05428 |  |        |                |                                         |
| 166161827                                 | 0.05400 |  |        |                |                                         |
| 166123502                                 | 0.04548 |  |        |                |                                         |
| 166117935                                 | 0.04149 |  |        |                |                                         |
| 166175637                                 | 0.03938 |  |        |                |                                         |
| 166162109                                 | 0.03622 |  |        |                |                                         |
| 166120729                                 | 0.02777 |  |        |                |                                         |
| 166089615                                 | 0.02167 |  |        |                |                                         |

|                        |         |  |  |  |  |
|------------------------|---------|--|--|--|--|
| 166089117 <sub>h</sub> | 0.02020 |  |  |  |  |
| 166122468 <sub>f</sub> | 0.01992 |  |  |  |  |
| 166196000              | 0.01976 |  |  |  |  |
| 166181749 <sub>k</sub> | 0.01745 |  |  |  |  |
| 166122470 <sub>g</sub> | 0.01725 |  |  |  |  |
| 166177993              | 0.01674 |  |  |  |  |
| 166183514 <sub>i</sub> | 0.01619 |  |  |  |  |
| 166106257              | 0.01486 |  |  |  |  |
| 166168914              | 0.01399 |  |  |  |  |
| 166098369              | 0.01350 |  |  |  |  |
| 166184074              | 0.01201 |  |  |  |  |
| 166118161              | 0.01166 |  |  |  |  |
| 166098372              | 0.01130 |  |  |  |  |
| 166152065              | 0.01097 |  |  |  |  |
| 166142782              | 0.01080 |  |  |  |  |
| 166094970              | 0.01010 |  |  |  |  |
| 166198840              | 0.00950 |  |  |  |  |
| 166086220              | 0.00949 |  |  |  |  |
| 166147768              | 0.00898 |  |  |  |  |
| 166083420              | 0.00834 |  |  |  |  |
| 166197698              | 0.00829 |  |  |  |  |
| 166128790              | 0.00815 |  |  |  |  |
| 166198884              | 0.00771 |  |  |  |  |
| 166185832              | 0.00744 |  |  |  |  |
| 166115262 <sub>j</sub> | 0.00733 |  |  |  |  |
| 166178177              | 0.00673 |  |  |  |  |
| 166178731              | 0.00648 |  |  |  |  |
| 166198482              | 0.00636 |  |  |  |  |
| 166133494              | 0.00557 |  |  |  |  |

|                        |         |  |  |  |  |
|------------------------|---------|--|--|--|--|
| 166115313              | 0.00555 |  |  |  |  |
| 166130570              | 0.00540 |  |  |  |  |
| 166112498              | 0.00516 |  |  |  |  |
| 166160740              | 0.00453 |  |  |  |  |
| 166184588              | 0.00451 |  |  |  |  |
| 166073347              | 0.00441 |  |  |  |  |
| 166078332              | 0.00433 |  |  |  |  |
| 166189276 <sub>i</sub> | 0.00432 |  |  |  |  |
| 166098374              | 0.00416 |  |  |  |  |
| 166165646              | 0.00377 |  |  |  |  |
| 166141123              | 0.00348 |  |  |  |  |
| 166133904              | 0.00341 |  |  |  |  |
| 166197188              | 0.00341 |  |  |  |  |
| 166098366              | 0.00332 |  |  |  |  |
| 166161640              | 0.00304 |  |  |  |  |
| 166150071              | 0.00276 |  |  |  |  |
| 166185272              | 0.00270 |  |  |  |  |
| 166173254 <sub>k</sub> | 0.00243 |  |  |  |  |
| 166142790              | 0.00238 |  |  |  |  |
| 166115308              | 0.00236 |  |  |  |  |
| 166166040              | 0.00235 |  |  |  |  |
| 166194855              | 0.00231 |  |  |  |  |
| 166181319              | 0.00213 |  |  |  |  |
| 166115336              | 0.00206 |  |  |  |  |
| 166082335              | 0.00195 |  |  |  |  |
| 166166084              | 0.00187 |  |  |  |  |
| 166097710              | 0.00163 |  |  |  |  |
| 166195563              | 0.00154 |  |  |  |  |
| 166184076              | 0.00149 |  |  |  |  |
| 166118309              | 0.00144 |  |  |  |  |

|                        |         |  |  |  |  |
|------------------------|---------|--|--|--|--|
| 166161638              | 0.00126 |  |  |  |  |
| 166115340 <sub>j</sub> | 0.00118 |  |  |  |  |
| 166160259              | 0.00108 |  |  |  |  |
| 166199068              | 0.00102 |  |  |  |  |
| 166077062              | 0.00085 |  |  |  |  |
| 166116936              | 0.00077 |  |  |  |  |
| 166095512              | 0.00076 |  |  |  |  |
| 166186728              | 0.00071 |  |  |  |  |
| 166110378 <sub>g</sub> | 0.00062 |  |  |  |  |
| 166155981 <sub>h</sub> | 0.00056 |  |  |  |  |
| 166132092              | 0.00056 |  |  |  |  |
| 166176653              | 0.00051 |  |  |  |  |
| 166102418              | 0.00048 |  |  |  |  |
| 166176585              | 0.00040 |  |  |  |  |
| 166128640              | 0.00035 |  |  |  |  |
| 166135852              | 0.00023 |  |  |  |  |

| <i>18 m - COG annotated proteins</i> |                                      |                       |                      |                       |                                                                                      |
|--------------------------------------|--------------------------------------|-----------------------|----------------------|-----------------------|--------------------------------------------------------------------------------------|
| <b>Gene ID</b>                       | <b>normalised spectral abundance</b> | <b>COG identifier</b> | <b>KO identifier</b> | <b>KEGG locus tag</b> | <b>COG description : KEGG description</b>                                            |
| 186212528 <sub>a</sub>               | 0.05178                              | COG1378               |                      | NEQ098                | predicted transcriptional regulators : hypothetical protein                          |
| 186260184 <sub>a</sub>               | 0.01990                              | COG1378               |                      | NEQ098                | predicted transcriptional regulators : hypothetical protein                          |
| 186323634                            | 0.00815                              | COG1629               |                      |                       | outer membrane receptor proteins, mostly Fe transport                                |
| 186330135                            | 0.00354                              | COG2165               |                      |                       | general secretory pathway proteins G and H and related periplasmic/secreted proteins |
| 186203427                            | 0.00268                              | COG0459               | K04077               | Cvib_0586             | chaperonin GroEL (HSP60 family)                                                      |

| 186325396                                    | 0.00029                       | COG0330       | K04088        | MXAN_3171           | membrane protease subunits, stomatin/prohibitin homologs : HflK                                                     |
|----------------------------------------------|-------------------------------|---------------|---------------|---------------------|---------------------------------------------------------------------------------------------------------------------|
| 186302986                                    | 0.00014                       | COG1629       | K02014        | CT1953              | outer membrane receptor proteins, mostly Fe transport : ferric siderophore receptor, putative, TonB receptor family |
| <b>18 m - KEGG and NR annotated proteins</b> |                               |               |               |                     |                                                                                                                     |
| Gene ID                                      | normalised spectral abundance | NR identifier | KO identifier | KEGG / NR locus tag | KEGG / NR description                                                                                               |
| 186250193                                    | 0.03535                       |               |               | SAK_0748            | prophage LambdaSa04, major capsid protein, HK97 family                                                              |
| 186108954                                    | 0.01496                       | ZP_02186589   |               | BAL199_17233        | hypothetical protein [alpha proteobacterium BAL199]                                                                 |
| 186340319                                    | 0.01172                       | YP_002433801  |               | Dalk_4655           | hypothetical protein [Desulfatibacillum alkenivorans AK-01]                                                         |
| 186120387                                    | 0.01077                       | ZP_02034709   |               | BACCAP_00296        | hypothetical protein [Bacteroides capillosus ATCC 29799]                                                            |
| 186267822                                    | 0.00917                       |               |               | amb4267             | hypothetical protein                                                                                                |
| 186322918                                    | 0.00767                       | ZP_02186589   |               | BAL199_17233        | hypothetical protein [alpha proteobacterium BAL199]                                                                 |
| 186104395                                    | 0.00674                       |               | K08944        | Cvib_1325           | bacteriochlorophyll A protein                                                                                       |
| 186171273                                    | 0.00587                       | ZP_03013728   |               | BACINT_01287        | hypothetical protein [Bacteroides intestinalis DSM 17393]                                                           |
| 186216762                                    | 0.00511                       | YP_001648266  |               |                     | hypothetical protein OsV5_190f [Ostreococcus virus OsV5]                                                            |
| 186188521                                    | 0.00474                       | AAU84208      |               | GZ37D1_55           | hypothetical protein [uncultured archaeon GZfos37D1]                                                                |
| 186193139                                    | 0.00263                       |               |               | Cthe_1719           | phage major capsid protein, HK97 family                                                                             |
| 186096477                                    | 0.00240                       |               |               | Cthe_1719           | phage major capsid protein, HK97 family                                                                             |
| 186213938                                    | 0.00211                       |               |               | Nwi_1542            | phage major capsid protein, HK97                                                                                    |
| 186288435                                    | 0.00189                       |               |               | Bcep1808_1173       | hypothetical protein                                                                                                |
| 186186444                                    | 0.00140                       | YP_002765714  |               | RER_22670           | hypothetical protein [Rhodococcus erythropolis PR4]                                                                 |
| 186201365                                    | 0.00119                       | ABW90952      |               |                     | gp23 major capsid protein [uncultured Myoviridae]                                                                   |

|                                           |         |          |  |           |                                                          |
|-------------------------------------------|---------|----------|--|-----------|----------------------------------------------------------|
| 186179269                                 | 0.00109 |          |  | HSM_0907  | hypothetical protein                                     |
| 186355884                                 | 0.00077 |          |  | Aave_2365 | hypothetical protein                                     |
| 186166939                                 | 0.00060 | EEH89810 |  |           | conserved hypothetical protein [Acidaminococcus sp. D21] |
| 186255081                                 | 0.00050 |          |  | BCE_0400  | phage major capsid protein, HK97 family                  |
| <b>18 m - Proteins with no annotation</b> |         |          |  |           |                                                          |
| 186096775                                 | 0.00241 |          |  |           |                                                          |
| 186097423                                 | 0.00916 |          |  |           |                                                          |
| 186098091                                 | 0.00174 |          |  |           |                                                          |
| 186111007                                 | 0.00078 |          |  |           |                                                          |
| 186111572                                 | 0.00059 |          |  |           |                                                          |
| 186115457                                 | 0.00104 |          |  |           |                                                          |
| 186115570*                                | 0.00011 |          |  |           |                                                          |
| 186115576                                 | 0.00019 |          |  |           |                                                          |
| 186123594                                 | 0.00212 |          |  |           |                                                          |
| 186125293                                 | 0.00370 |          |  |           |                                                          |
| 186127924                                 | 0.00058 |          |  |           |                                                          |
| 186131984                                 | 0.00104 |          |  |           |                                                          |
| 186132934                                 | 0.00114 |          |  |           |                                                          |
| 186132940                                 | 0.00646 |          |  |           |                                                          |
| 186133174                                 | 0.02253 |          |  |           |                                                          |
| 186133182                                 | 0.00132 |          |  |           |                                                          |
| 186133258                                 | 0.00558 |          |  |           |                                                          |
| 186133464                                 | 0.04461 |          |  |           |                                                          |
| 186133598 <sub>b</sub>                    | 0.00897 |          |  |           |                                                          |
| 186133600 <sub>c</sub>                    | 0.02301 |          |  |           |                                                          |
| 186133668                                 | 0.00039 |          |  |           |                                                          |
| 186133988                                 | 0.00027 |          |  |           |                                                          |
| 186135915                                 | 0.00096 |          |  |           |                                                          |
| 186144849                                 | 0.00090 |          |  |           |                                                          |

|                        |         |  |  |  |  |
|------------------------|---------|--|--|--|--|
| 186146871              | 0.00261 |  |  |  |  |
| 186150520              | 0.03110 |  |  |  |  |
| 186150522              | 0.01653 |  |  |  |  |
| 186152236              | 0.00251 |  |  |  |  |
| 186157988              | 0.00347 |  |  |  |  |
| 186166888              | 0.00138 |  |  |  |  |
| 186172010              | 0.00060 |  |  |  |  |
| 186174298              | 0.00457 |  |  |  |  |
| 186180639 <sub>b</sub> | 0.01514 |  |  |  |  |
| 186180725 <sub>b</sub> | 0.00639 |  |  |  |  |
| 186185958              | 0.00054 |  |  |  |  |
| 186187134              | 0.00088 |  |  |  |  |
| 186188427              | 0.00024 |  |  |  |  |
| 186188638              | 0.00083 |  |  |  |  |
| 186195344              | 0.00123 |  |  |  |  |
| 186196955              | 0.01096 |  |  |  |  |
| 186204438              | 0.00232 |  |  |  |  |
| 186211626              | 0.00145 |  |  |  |  |
| 186213126 <sub>d</sub> | 0.00737 |  |  |  |  |
| 186218287              | 0.00057 |  |  |  |  |
| 186221108 <sub>c</sub> | 0.00454 |  |  |  |  |
| 186221116 <sub>b</sub> | 0.00898 |  |  |  |  |
| 186221121              | 0.00041 |  |  |  |  |
| 186225633 <sub>d</sub> | 0.03121 |  |  |  |  |
| 186226973              | 0.00110 |  |  |  |  |
| 186234910              | 0.00076 |  |  |  |  |
| 186235104              | 0.00646 |  |  |  |  |
| 186239503              | 0.00082 |  |  |  |  |
| 186243868 <sub>c</sub> | 0.00678 |  |  |  |  |



|                         |         |  |  |  |  |
|-------------------------|---------|--|--|--|--|
| 186243873* <sub>b</sub> | 0.00555 |  |  |  |  |
| 186247349               | 0.01576 |  |  |  |  |
| 186251752               | 0.00149 |  |  |  |  |
| 186255283               | 0.00020 |  |  |  |  |
| 186263169               | 0.00052 |  |  |  |  |
| 186289901               | 0.00120 |  |  |  |  |
| 186296333               | 0.00288 |  |  |  |  |
| 186296791               | 0.00187 |  |  |  |  |
| 186303307               | 0.00035 |  |  |  |  |
| 186305449               | 0.00032 |  |  |  |  |
| 186308018               | 0.00041 |  |  |  |  |
| 186308756               | 0.01295 |  |  |  |  |
| 186321445               | 0.00459 |  |  |  |  |
| 186321482 <sub>c</sub>  | 0.04544 |  |  |  |  |
| 186331727               | 0.00234 |  |  |  |  |
| 186334026               | 0.00196 |  |  |  |  |
| 186335225               | 0.00205 |  |  |  |  |
| 186335471               | 0.00241 |  |  |  |  |
| 186344860               | 0.00118 |  |  |  |  |
| 186346285               | 0.01518 |  |  |  |  |
| 186348107               | 0.00077 |  |  |  |  |

| <i>23 m - COG annotated proteins</i> |                                      |                       |                      |                       |                                                                                |
|--------------------------------------|--------------------------------------|-----------------------|----------------------|-----------------------|--------------------------------------------------------------------------------|
| <b>Gene ID</b>                       | <b>normalised spectral abundance</b> | <b>COG identifier</b> | <b>KO identifier</b> | <b>KEGG locus tag</b> | <b>COG description : KEGG description</b>                                      |
| 184741277                            | 0.017726037                          | COG0776               |                      | SYN_02859             | bacterial nucleoid DNA-binding protein : DNA-binding protein HU                |
| 184609007                            | 0.016332251                          | COG1450               |                      | Oter_2851             | general secretory pathway protein D : type II and III secretion system protein |

| 184630330                                    | 0.012087941                                  | COG1837              | K06960                   | CLL_A1247                      | predicted RNA-binding protein (KH domain) :<br>hypothetical protein                            |
|----------------------------------------------|----------------------------------------------|----------------------|--------------------------|--------------------------------|------------------------------------------------------------------------------------------------|
| 184814744                                    | 0.007732722                                  | COG3409              |                          |                                | putative peptidoglycan-binding domain-containing<br>protein                                    |
| 184723188                                    | 0.006645902                                  | COG1653              |                          | Noca_3914                      | sugar-binding periplasmic proteins/domains :<br>extracellular solute-binding protein, family 1 |
| 184729342                                    | 0.005151336                                  | COG0459              | K04077                   | Oter_2054                      | chaperonin GroEL (HSP60 family)                                                                |
| 184751721                                    | 0.002038819                                  | COG0776              | K03530                   | azo0315                        | bacterial nucleoid DNA-binding protein : hupB                                                  |
| 184834728                                    | 0.001993522                                  | COG0683              |                          | SYN_00789                      | ABC-type branched-chain amino acid transport<br>systems, periplasmic component                 |
| 184819943                                    | 0.001917474                                  | COG0776              | K03530                   | Plut_1957                      | bacterial nucleoid DNA-binding protein : histone-like<br>DNA-binding protein; HU-beta          |
| <b>23 m - KEGG and NR annotated proteins</b> |                                              |                      |                          |                                |                                                                                                |
| <b>Gene ID</b>                               | <b>normalised<br/>spectral<br/>abundance</b> | <b>NR identifier</b> | <b>KO<br/>identifier</b> | <b>KEGG / NR locus<br/>tag</b> | <b>KEGG / NR description</b>                                                                   |
| 184829089                                    | 0.047540673                                  |                      |                          | Smed_1892                      | hypothetical protein                                                                           |
| 184693861 <sub>a</sub>                       | 0.021620642                                  | A7U6E7               |                          |                                | putative major capsid protein [Chrysochromulina<br>ericina virus]                              |
| 184663677 <sub>a</sub>                       | 0.021221744                                  | A7U6E7               |                          |                                | putative major capsid protein [Chrysochromulina<br>ericina virus]                              |
| 184759346                                    | 0.020715407                                  | YP_001648266         |                          | OsV5_190f                      | hypothetical protein [Ostreococcus virus OsV5]                                                 |
| 184796349                                    | 0.019224766                                  | ZP_03706494          |                          | CLOSTMETH_01228                | hypothetical protein [Clostridium methylpentosum<br>DSM 5476]                                  |
| 184674523 <sub>a</sub>                       | 0.01878926                                   | A7U6E7               |                          |                                | putative major capsid protein [Chrysochromulina<br>ericina virus]                              |
| 184727907                                    | 0.012780957                                  | ZP_03013728          |                          | BACINT_01287                   | hypothetical protein [Bacteroides intestinalis DSM<br>17393]                                   |
| 184858354                                    | 0.012445286                                  |                      |                          | Bcep1808_1173                  | hypothetical protein                                                                           |
| 184615458 <sub>b</sub>                       | 0.00783673                                   | YP_002299293         |                          | RC1_3116                       | hypothetical protein [Rhodospirillum centenum SW]                                              |

|                        |             |             |        |                  |                                                                      |
|------------------------|-------------|-------------|--------|------------------|----------------------------------------------------------------------|
| 184717784 <sub>a</sub> | 0.007606148 | A7U6F0      |        |                  | putative major capsid protein [Phaeocystis pouchetii virus]          |
| 184783470 <sub>b</sub> | 0.00670957  |             |        | amb4267          | hypothetical protein                                                 |
| 184677323*             | 0.006347478 |             |        | plu3036          | hypothetical protein                                                 |
| 184765239*             | 0.005953867 | AAU84208    |        | GZ37D1_55        | hypothetical protein [uncultured archaeon GZfos37D1]                 |
| 184728060*             | 0.004522581 |             |        | amb4267          | hypothetical protein                                                 |
| 184610116              | 0.004189109 |             |        | Bd3266           | cell wall surface anchor family protein                              |
| 184609428              | 0.004101986 | ZP_02421392 |        | EUBSIR_00216     | hypothetical protein [Eubacterium siraeum DSM 15702]                 |
| 184762189 <sub>a</sub> | 0.003388765 | A7U6E7      |        |                  | putative major capsid protein [Chrysochromulina ericina virus]       |
| 184616650*             | 0.003326858 |             | K08945 | Cvib_0330        | bacteriochlorophyll C binding protein; chlorosome envelope protein A |
| 184654290              | 0.003293628 |             |        | Plut_0689        | gas vesicle synthesis protein GvpA                                   |
| 184683542              | 0.003248441 |             |        | Daci_1946        | putative phage major head protein                                    |
| 184717084              | 0.002738548 | AAU84208    |        |                  | hypothetical protein [uncultured archaeon GZfos37D1]                 |
| 184761703              | 0.002499009 |             |        | Fjoh_3203        | Ig domain protein, group 2 domain protein                            |
| 184619854              | 0.002486002 | ACO64625    |        |                  | predicted protein [Micromonas sp. RCC299]                            |
| 184806079              | 0.002155187 |             |        | BTH_I0914        | hypothetical protein                                                 |
| 184598462              | 0.002025957 |             |        | Cthe_1719        | phage major capsid protein, HK97 family                              |
| 184636514              | 0.001569903 |             |        | PTH_2189         | hypothetical protein                                                 |
| 184699280              | 0.001564149 |             |        | HSM_0907         | hypothetical protein                                                 |
| 184785344              | 0.001502137 |             |        | nfa430           | putative phage head                                                  |
| 184622093              | 0.001315815 |             | K08946 | Cvib_1647        | chlorosome envelope protein B                                        |
| 184698829              | 0.00124255  |             | K08947 | Cvib_0329        | chlorosome envelope protein C                                        |
| 184699260              | 0.001048672 |             | K08946 | Cvib_0367        | chlorosome envelope protein B                                        |
| 184602186              | 0.000904386 |             |        | NT01CX_0836      | phage capsid family protein, putative                                |
| 184619542              | 0.000843609 | ZP_03544057 |        | CtesDRAFT_PD3290 | hypothetical protein [Comamonas testosteroni KF-1]                   |

|                                           |             |  |        |           |                                     |
|-------------------------------------------|-------------|--|--------|-----------|-------------------------------------|
| 184693284                                 | 0.000537906 |  | K06142 | Cvib_1549 | outer membrane chaperone Skp (OmpH) |
| 184853817                                 | 0.000476227 |  |        | Cvib_1511 | hypothetical protein                |
| <b>23 m - Proteins with no annotation</b> |             |  |        |           |                                     |
| 184639659                                 | 0.043948442 |  |        |           |                                     |
| 184736526 <sub>c</sub>                    | 0.041039357 |  |        |           |                                     |
| 184780301                                 | 0.034503992 |  |        |           |                                     |
| 184816235                                 | 0.032095179 |  |        |           |                                     |
| 184703327                                 | 0.028114494 |  |        |           |                                     |
| 184757685                                 | 0.022912986 |  |        |           |                                     |
| 184749374                                 | 0.022013987 |  |        |           |                                     |
| 184768326                                 | 0.021859704 |  |        |           |                                     |
| 184855542                                 | 0.021374309 |  |        |           |                                     |
| 184647188                                 | 0.021260105 |  |        |           |                                     |
| 184857022 <sub>d</sub>                    | 0.019565025 |  |        |           |                                     |
| 184844109 <sub>e</sub>                    | 0.019406682 |  |        |           |                                     |
| 184673540                                 | 0.016879013 |  |        |           |                                     |
| 184673891                                 | 0.015992274 |  |        |           |                                     |
| 184752115                                 | 0.014966957 |  |        |           |                                     |
| 184830016                                 | 0.014369697 |  |        |           |                                     |
| 184689526                                 | 0.014288459 |  |        |           |                                     |
| 184830014 <sub>c</sub>                    | 0.013541019 |  |        |           |                                     |
| 184736969                                 | 0.012498216 |  |        |           |                                     |
| 184794003                                 | 0.012175049 |  |        |           |                                     |
| 184716841* <sub>h</sub>                   | 0.011673087 |  |        |           |                                     |
| 184614058 <sub>e</sub>                    | 0.011632278 |  |        |           |                                     |
| 184843043                                 | 0.011452762 |  |        |           |                                     |
| 184606136                                 | 0.010996161 |  |        |           |                                     |
| 184701852                                 | 0.009831345 |  |        |           |                                     |
| 184689528 <sub>d</sub>                    | 0.009574146 |  |        |           |                                     |

|                         |             |  |  |  |  |
|-------------------------|-------------|--|--|--|--|
| 184818291               | 0.009186212 |  |  |  |  |
| 184717128               | 0.009020845 |  |  |  |  |
| 184634342               | 0.00885126  |  |  |  |  |
| 184632228 <sub>f</sub>  | 0.008173806 |  |  |  |  |
| 184609952*              | 0.008108204 |  |  |  |  |
| 184743077 <sub>h</sub>  | 0.007954013 |  |  |  |  |
| 184744668 <sub>f</sub>  | 0.007008787 |  |  |  |  |
| 184693008               | 0.006893361 |  |  |  |  |
| 184699860               | 0.00671353  |  |  |  |  |
| 184644432*              | 0.006647    |  |  |  |  |
| 184624307               | 0.006630331 |  |  |  |  |
| 184717134 <sub>h</sub>  | 0.00629088  |  |  |  |  |
| 184687320*              | 0.006087825 |  |  |  |  |
| 184609995 <sub>f</sub>  | 0.005980399 |  |  |  |  |
| 184606128               | 0.00593924  |  |  |  |  |
| 184798514               | 0.005508034 |  |  |  |  |
| 184820885               | 0.005452628 |  |  |  |  |
| 184774274               | 0.005257476 |  |  |  |  |
| 184634936 <sub>d</sub>  | 0.005138151 |  |  |  |  |
| 184807615               | 0.004891909 |  |  |  |  |
| 184717137 <sub>f</sub>  | 0.004760532 |  |  |  |  |
| 184634670               | 0.004374106 |  |  |  |  |
| 184699106 <sub>g</sub>  | 0.004352547 |  |  |  |  |
| 184694334               | 0.004323657 |  |  |  |  |
| 184701357 <sub>g</sub>  | 0.004288858 |  |  |  |  |
| 184668292 <sub>f</sub>  | 0.00420732  |  |  |  |  |
| 184616142               | 0.004153614 |  |  |  |  |
| 184705566* <sub>i</sub> | 0.004036009 |  |  |  |  |
| 184656354               | 0.003894939 |  |  |  |  |

|                        |             |  |  |  |  |
|------------------------|-------------|--|--|--|--|
| 184699180              | 0.003299837 |  |  |  |  |
| 184792136              | 0.003269076 |  |  |  |  |
| 184803016              | 0.0031682   |  |  |  |  |
| 184676233              | 0.003135831 |  |  |  |  |
| 184634894              | 0.002503929 |  |  |  |  |
| 184655451              | 0.002407637 |  |  |  |  |
| 184694448 <sub>i</sub> | 0.002080588 |  |  |  |  |
| 184616145              | 0.001982117 |  |  |  |  |
| 184693324              | 0.001959088 |  |  |  |  |
| 184708522              | 0.001890434 |  |  |  |  |
| 184651766              | 0.001881649 |  |  |  |  |
| 184654540              | 0.00153123  |  |  |  |  |
| 184705454 <sub>f</sub> | 0.001429528 |  |  |  |  |
| 184705654              | 0.001336639 |  |  |  |  |
| 184805593              | 0.001324748 |  |  |  |  |
| 184716621              | 0.001323209 |  |  |  |  |
| 184743075 <sub>f</sub> | 0.001221543 |  |  |  |  |
| 184814882              | 0.001166233 |  |  |  |  |
| 184792312              | 0.001093715 |  |  |  |  |
| 184829092              | 0.000840101 |  |  |  |  |
| 184716837 <sub>f</sub> | 0.000762877 |  |  |  |  |
| 184796632              | 0.000411936 |  |  |  |  |
| 184845751              | 0.000200619 |  |  |  |  |
| 184730970*             | 0.000186184 |  |  |  |  |
| 184613774*             | 0.000170922 |  |  |  |  |
